# Supplementary material for: Rh-Catalyzed C–H alkylation enabling modular synthesis of CF3-substituted benzannulated macrocyclic inhibitors of B cell responses
Source: Royal Society of Chemistry journal article supplement (doi:10.1039/d1ob00296a), 2021-01-01
Supplement: d1ob00296a1.pdf [file d1ob00296a1.pdf]

## **Rh-catalyzed C-H Alkylation Enabling Modular Synthesis of CF<sub>3</sub>-substituted Benzannulated Macrocyclic Inhibitors of B cell responses**

Tao Sun,<sup>[a]</sup> Shijun He,<sup>[b,c]</sup> Zhongliang Xu,<sup>[b]</sup> Jianping Zuo,<sup>[b,c]</sup> Yang Yu,<sup>\*[a]</sup> and Weibo Yang<sup>\*[b,c,d]</sup>

[a] Center for Supramolecular Chemistry and Catalysis and Department of Chemistry, Shanghai University, 99 Shang-Da Road, Shanghai 200444, China

[b] Chinese Academy of Sciences Key Laboratory of Receptor Research, Shanghai Institute of Materia Medica (SIMM), Chinese Academy of Sciences, Shanghai, China

[c] University of Chinese Academy of Sciences, Beijing 100049, China

[d] School of Pharmaceutical Science and Technology, Hangzhou Institute for Advanced Study, University of Chinese Academy of Sciences, Hangzhou 310024, China.

## Contents:

Page 3: General comments

Page 4: General procedure for the synthesis of  $\beta$ -trifluoromethyl- $\alpha,\beta$ -enones

Page 4: General procedure for C-H activation

Page 4: Reaction in gram scale of **3aa**

Page 5: General procedure for the synthesis of construction of functional CF<sub>3</sub>-supported benzannulated macrolactams

Page 7: Plausible reaction mechanism

Page 7: Biological assay

Page 10: **Table S1.** Inhibitory activity on Con A-induced T and LPS-induced B cell proliferation.

Page 12: X-ray molecular structure and Crystallographic Data

Page 18: Characterization Data of Starting Materials

Page 22: Characterization Data of Desired Products

Page 92: References

## General comments:

NMR spectra were recorded at room temperature on the following spectrometers: Bruker Avance III 400 Spectrometer (400 MHz) and Bruker Avance III 500 (Cryo) Spectrometer (500 MHz). Chemical shifts are given in ppm and coupling constants in Hz.  $^1\text{H}$  spectra were calibrated in relation to the reference measurement of TMS (0.00 ppm).  $^{13}\text{C}$  spectra were calibrated in relation to deuterated solvents. The following abbreviations were used for  $^1\text{H}$  NMR spectra to indicate the signal multiplicity: s (singlet), d (doublet), t (triplet), q (quartet) and m (multiplet) as well as combinations of them. For HRMS data, the ESI-positive method was applied on the Agilent G6520 Q-TOF. Chemicals were purchased from commercial suppliers. Unless stated otherwise, all the substrates and solvents were purified and dried according to standard methods prior to use. All the compounds as stock solution were dissolved with 100% dimethyl sulfoxide (DMSO, Sinopharm, China) and diluted with RPMI 1640 medium (Gibco, Grand Island, NY, USA) containing 10% fetal bovine serum (FBS) (Hyclone, South Logan, UT, USA). Thiazolyl Blue Tetrazolium Bromide (MTT) were obtained from Sigma-Aldrich (St.Louis.MO.USA); Concanavalin A (ConA) and lipopolysaccharide (LPS, Escherichia coli O55:B5) were purchased from Sigma (St. Louis, MO, USA), [ $^3\text{H}$ ] thymidine was purchased from Perkin-Elmer (Waltham, MA, USA).

## General procedure for the synthesis of $\beta$ -trifluoromethyl- $\alpha,\beta$ -enones

$\beta$ -trifluoromethyl- $\alpha,\beta$ -enones was synthesized according to literature procedure<sup>1</sup>. For example, pyrrolidine (1.8 mL, 21 mmol), trifluoroacetaldehyde hemiacetal (3.9 mL, 30 mmol) and the corresponding acetophenone (30 mmol) were dissolved in toluene. The mixture was heated at 120 °C until starting material was completely reacted (TLC). Then, the solvent was removed under reduced pressure and the resulting product was chromatographed on silica gel eluting with petroleum ether-EtOAc to afford the desired  $\beta$ -trifluoromethyl- $\alpha,\beta$ -enones **2a-l**.

## General procedure for C-H activation

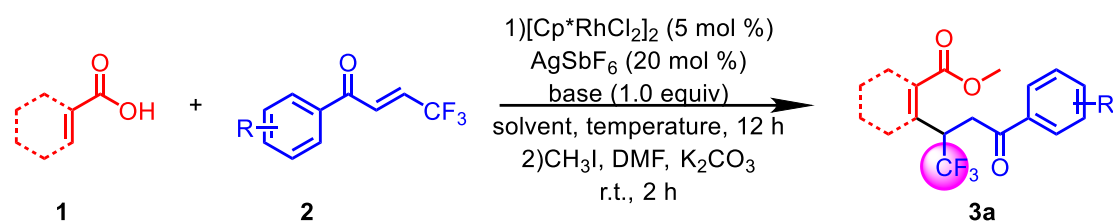

To the solution of the **1** (0.1 mmol, 1.0 equiv) in  $\text{CH}_3\text{CN}$  (0.6 mL), **2** (0.15 mmol, 1.5 equiv),  $[\text{Cp}^*\text{RhCl}_2]_2$  (5 mol %),  $\text{AgSbF}_6$  (20 mol %),  $\text{Cs}_2\text{CO}_3$  (0.5 equiv) was added. The solution was stirred at 60 °C for 12 hours. The reaction progress was monitored by TLC. When the starting material disappeared, the solvent was removed under reduced pressure,  $\text{CH}_3\text{I}$  (3.0 equiv),  $\text{K}_2\text{CO}_3$  (1.0 equiv) and DMF were added. The solution was stirred at room temperature for 2 hours. The reaction was quenched with water, and extracted with EtOAc. The combined organic layers were dried over anhydrous  $\text{Na}_2\text{SO}_4$ , filtered and concentrated. The residue was purified by flash chromatography silica gel afford the corresponding **3a**.

## Reaction in gram scale of 3aa

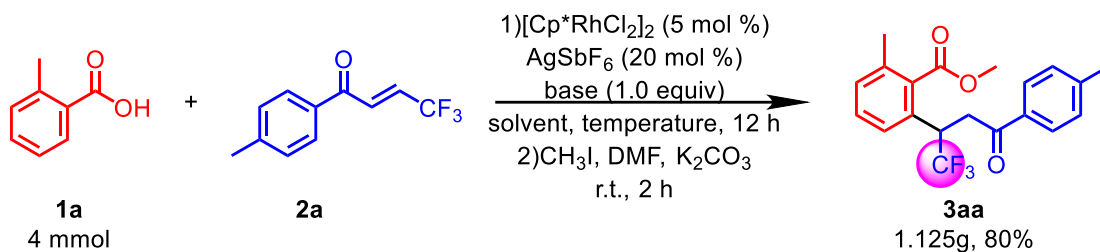

To the solution of the **1a** (4 mmol, 1.0 equiv) in  $CH_3CN$  (24 mL), **2a** (6 mmol, 1.5 equiv),  $[Cp^*RhCl_2]_2$  (5 mol %),  $AgSbF_6$  (20 mol %),  $Cs_2CO_3$  (0.5 equiv) was added. The solution was stirred at 60 °C for 12 hours. The reaction progress was monitored by TLC. When the starting material disappeared, the solvent was removed under reduced pressure,  $CH_3I$  (3.0 equiv),  $K_2CO_3$  (1.0 equiv) and DMF were added. The solution was stirred at room temperature for 2 hours. The reaction was quenched with water, and extracted with EtOAc. The combined organic layers were dried over anhydrous  $Na_2SO_4$ , filtered and concentrated. The residue was purified by flash chromatography silica gel afford the 1.125 g (yield = 80%) **3aa**.

## General procedure for the synthesis of construction of functional $CF_3$ -supported benzannulated macrolactams

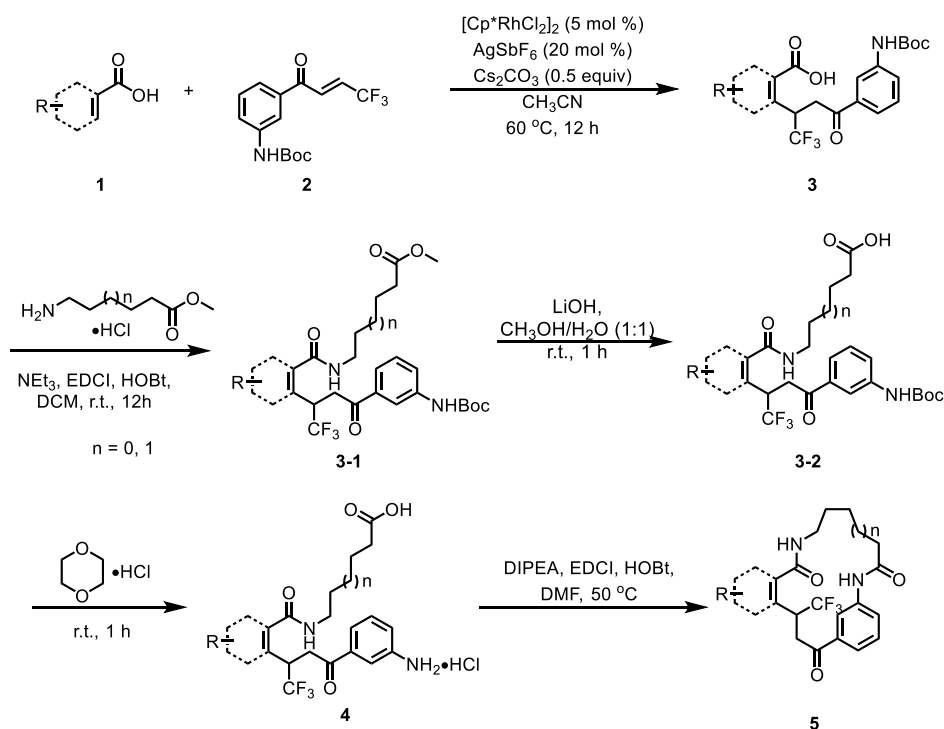

Reaction conditions: 1) **1** (0.1 mmol), **2** (0.15 mmol), [Cp\*RhCl<sub>2</sub>]<sub>2</sub> (5 mol %), AgSbF<sub>6</sub> (20 mol %), Cs<sub>2</sub>CO<sub>3</sub> (0.5 equiv), CH<sub>3</sub>CN (0.6 mL) at 60 °C under air for 12 h; 2) **3** (0.3 mmol), amino acid esters (0.45 mmol), EDCI (1.2 equiv), HOBT (1.5 equiv), NEt<sub>3</sub> (4.5 equiv), DMF (3 mL) at r.t. under air for 12 h; 3) CH<sub>3</sub>OH/THF/H<sub>2</sub>O (1 mL:1 mL:1 mL), LiOH (10 equiv); 4) hydrogen chloride-1,4-dioxane; 5) EDCI (1.2 equiv), HOBT (1.5 equiv), NEt<sub>3</sub> (4.5 equiv), DMF (60 mL) at 50 °C under air for 12 h.

To the solution of the **1** (0.1 mmol, 1.0 equiv) in CH<sub>3</sub>CN (0.6 mL), **2** (0.15 mmol, 1.5 equiv), [Cp\*RhCl<sub>2</sub>]<sub>2</sub> (5 mol %), AgSbF<sub>6</sub> (20 mol %), Cs<sub>2</sub>CO<sub>3</sub> (0.5 equiv) was added. The solution was stirred at 60 °C for 12 hours. The reaction progress was monitored by TLC or HPLC/MS (some reactions are difficult to be monitored by TLC, so MS was used instead of TLC). When the starting material disappeared, the reaction was quenched with water, and extracted with EtOAc. The combined organic layers were dried over anhydrous Na<sub>2</sub>SO<sub>4</sub>, filtered and concentrated. The residue was purified by flash chromatography silica gel afford the corresponding **3**.

**3** (0.3 mmol, 1.0 equiv), amino acid (0.45 mmol, 1.5 equiv), EDCI (0.36 mmol, 1.2 equiv), HOBT (0.45 mmol, 1.5 equiv), NEt<sub>3</sub> (1.35 mmol, 4.5 equiv) were dissolved in DMF (3 mL). The mixture was stirred at r.t. under air for 12 h. The reaction progress was monitored by TLC, when the starting material disappeared, the reaction was quenched with water, and extracted with EtOAc. The combined organic layers were washed with water and brine solution in turns, dried over Na<sub>2</sub>SO<sub>4</sub>. After being filtered, the organic phase was concentrated and purified by flash chromatography silica gel afford the desired product **3-1**.

MeOH (0.7 mL) and THF (0.7 mL) was added to give a solution of **3-1**, then LiOH (10 equiv) in H<sub>2</sub>O (0.7 mL) was added. The mixture was stirred at ambient temperature for 1 h. After removed solvent in vacuum, DCM was added and adjust pH = 3~4 by HCl (1 M). Hereafter, the resulting solution was concentrated under reduced pressure to afford crude product **3-2** without further purification.

The product **3-2** was dissolved in hydrogen chloride-1,4-dioxane (3 mL), after stirred at ambient temperature for 1 h, the reaction was monitored by HPLC/MS,

when the starting material disappeared, the resulting solution was concentrated under reduced pressure to afford product **4** without further purification.

The resulting product **4** was dissolved in DMF (60 mL), then EDCI (1.2 equiv) and HOBt (1.5 equiv), NEt<sub>3</sub> (4.5 equiv) was added. After stirred overnight at 50 °C, the reaction progress was monitored by HPLC/MS, when the starting material disappeared, the reaction was quenched with water, and extracted with EtOAc. The combined organic layers were washed with water and brine solution in turns, dried over Na<sub>2</sub>SO<sub>4</sub>. After being filtered, the organic phase was concentrated and purified by flash chromatography silica gel afford the desired product **5**.

## Plausible reaction mechanism

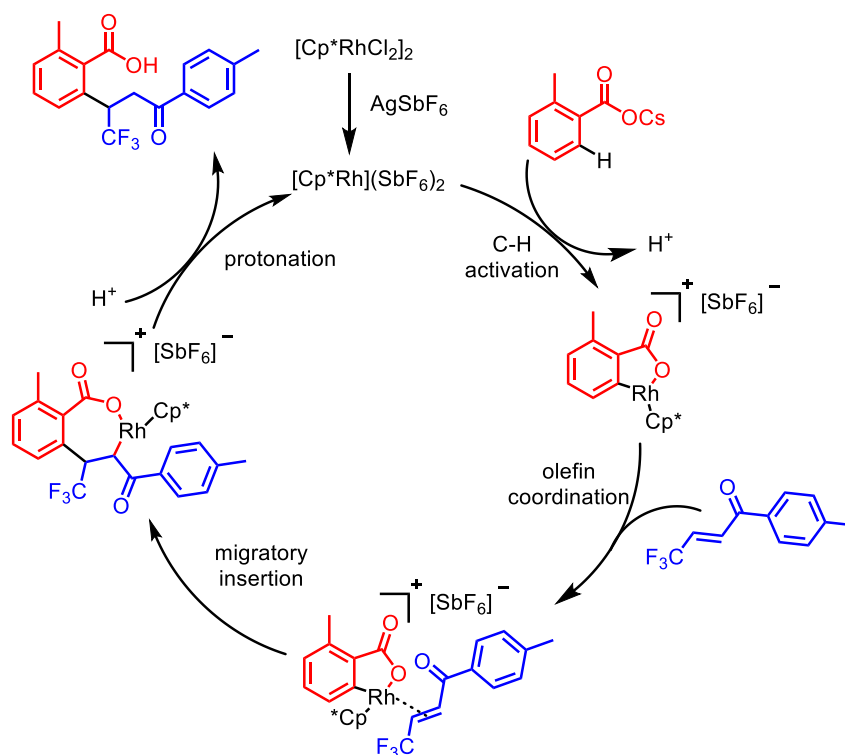

## Biological assay

### Animals

Inbred 6 to 8-week-old female BALB/c mice were purchased from Shanghai Jiesijie Experimental Animal Co., Ltd. (Certificate No. 2018-0004, China). The mice were housed under specific pathogen-free conditions with a controlled environment (12

hours of light/12 hours of dark cycle, 22±1 °C, 55±5% relative humidity). All mice were fed standard laboratory chow and water ad libitum and allowed to acclimatize in our facility for one week before any experiments started. All experiments were carried out according to the National Institutes of Health Guide for Care and Use of Laboratory Animals and were approved by the Bioethics Committee of the Shanghai Institute of Materia Medica (IACUC Protocol #2020-03-ZJP-120).

### **Splenocytes preparation**

Mice were sacrificed and their spleens were isolated aseptically. The spleens were ground up, and a single cell suspension was prepared after cell debris and clumps were removed. Erythrocytes were depleted with ammonium chloride buffer solution. Cells were washed and suspended in RPMI 1640 media containing 10% FBS, penicillin (100 U/mL), and streptomycin (100 µg/mL). Cells were counted by trypan blue exclusion.

### **Cell viability assay**

Splenocytes ( $8 \times 10^5$  /well) were seeded in the 96-well plates in triplicate with 1640 media containing 10% FBS, penicillin (100 U/mL), and streptomycin (100 µg/mL) in presence or absence of indicated concentrations of compounds, then the cells were cultured in a humidified, 37°C, 5% CO<sub>2</sub>-containing incubator for 48 hours. MTT solution was added to each well at a final concentration of 0.5mg/mL, and incubated for 4 hours before the end of culture. The quantity of formazan (presumably directly proportional to the number of viable cells) is measured at 570 nm with a microplate reader (Molecular Devices, Sunnyvale, CA, USA) and the cell viability was calculated.

### **Splenocytes proliferation assay**

Splenocytes ( $5 \times 10^5$ /well) were cultured in 96-well plates in triplicate with 1640 media containing 10% FBS, penicillin (100 U/mL), and streptomycin (100 µg/mL) in the presence or absence of indicated concentrations of compounds and stimulated



with 1 µg/mL of Con A or 10 µg/mL of LPS, respectively. Cells were maintained in a humidified, 37 °C, 5% CO<sub>2</sub>-containing incubator for 48 hours and pulsed with 0.5 µCi/well of [<sup>3</sup>H] thymidine 8 h in advance of the end of culture. Cells were harvested onto glass fiber filters after freeze and thaw. The incorporated radioactivity was counted using a Beta Scintillation Counter (PerkinElmer Life Sciences, Boston, MA).

### **B cell purification and in vitro stimulation**

After mononuclear cell suspension preparation, mouse splenic polyclonal CD19<sup>+</sup> B cells were isolated using PE-conjugated anti-CD19 Ab (BD Pharmingen, San Diego, CA, USA), anti-PE MicroBeads (Miltenyi Biotec GmbH, Bergisch Gladbach, Germany) and positively selected by a magnetic cell-sorting protocol (Miltenyi Biotec GmbH, Bergisch Gladbach, Germany). The purity of the resultant cell population was determined by flow cytometry analysis and was consistently 98%. Purified B cells were then cultured with medium alone or with the TLR4 ligand LPS (10 µg/ml) or anti-mouse IgM (10 µg/mL) plus anti-mouse CD40 (2.5 µg/mL). After incubation, for activation assays, cells were analyzed on flow cytometry at 24 h; For antibody secretion assays, cells were cultured for 6 days and the supernatants were collected for further determination.

### **Flow cytometry analysis**

Cells were washed with phosphatebuffered saline and then were blocked with anti-mouse CD16/CD32 Ab (eBioscience) and stained with PerCp-Cy5.5-conjugated anti-mouse CD69 and BV421-conjugated anti-mouse MHC-II. All immunofluorescent mAbs used in this research were obtained from BD Biosciences (Franklin Lakes, NJ, USA). The data were analyzed using FlowJo software (Tree Star, Ashland, OR, USA).

### **Detection of antibodies**

Supernatants were analyzed using a Luminex multiplex assay based suspension bead array (SBA) by a ProcartaPlex mouse antibody isotyping panel 7plex assay kit (EPX070-20815-901 (Invitrogen). Assay plates were read by Luminex 200

Instruments (Luminex, Austin, TX). The concentrations were calculated by the xPONENT software (LUMINEX, Austin, TX, USA). Heat maps were generated using GraphPad Prism 8.0 software.

### Statistical analysis

The data from this research study were analyzed using GraphPad Prism 8.0 software. Statistical analysis was performed using oneway ANOVA, and data are presented as the mean  $\pm$  SD.  $P < 0.05$  was considered statistically significant.

**Table S1. Inhibitory activity on Con A-induced T and LPS-induced B cell proliferation.**

| Compound    | Cytotoxicity<br>CC <sub>50</sub> ( $\mu$ M) | Con A stimulation<br>IC <sub>50</sub> ( $\mu$ M) | LPS stimulation<br>IC <sub>50</sub> ( $\mu$ M) |
|-------------|---------------------------------------------|--------------------------------------------------|------------------------------------------------|
| <b>5a</b>   | >200                                        | 42.35                                            | 5.50                                           |
| <b>5b</b>   | >200                                        | 51.44                                            | 12.95                                          |
| <b>5c</b>   | >200                                        | 29.23                                            | 3.90                                           |
| <b>5f</b>   | >200                                        | 97.9                                             | 2.24                                           |
| <b>5h</b>   | 183.9                                       | 35.75                                            | 4.82                                           |
| <b>CsA*</b> | 8.38                                        | 0.05                                             | 0.32                                           |

\* CsA, cyclosporin A, positive control, with much higher cytotoxicity

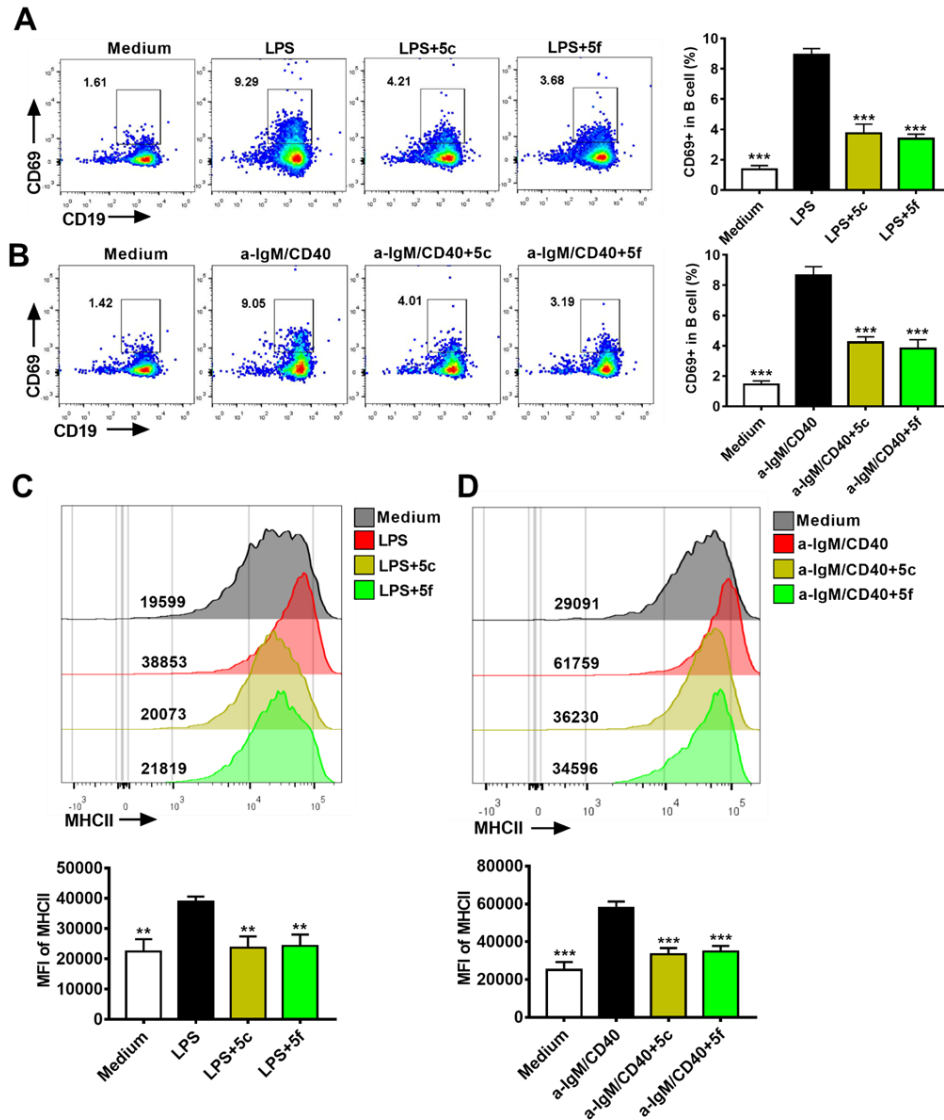

Figure S1. Compounds 5c and 5f impeded the activation and the upregulation of antigen-presenting molecule of LPS and anti-IgM/CD40-primed CD19+ B cells. Primary murine CD19+ B cells were cultured with LPS or anti-mouse IgM and purified hamster anti-mouse CD40 Ab in the absence or presence of compounds 5  $\mu$ M in 96-well plates for 24 hours to determine B cell activation. Cells were collected and determined the expression of CD69 and MHC-II, and data were shown as the representative dot plots (A and B, left panel) or histograms displaying mean fluorescence intensity (MFI) (C and D, upper panel) and statistics analysis derived from 2 independent experiments with similar results (A and B, right panel for CD69; C and D, lower panel for MHC-II). Numbers inserted in C and D showing the MFI

value of MHCII molecule. Data were shown as mean  $\pm$  SD, \*\*  $P < 0.01$ , \*\*\* $P < 0.001$  versus indicated stimuli-conditioned cells.

## X-ray molecular structure and Crystallographic Data

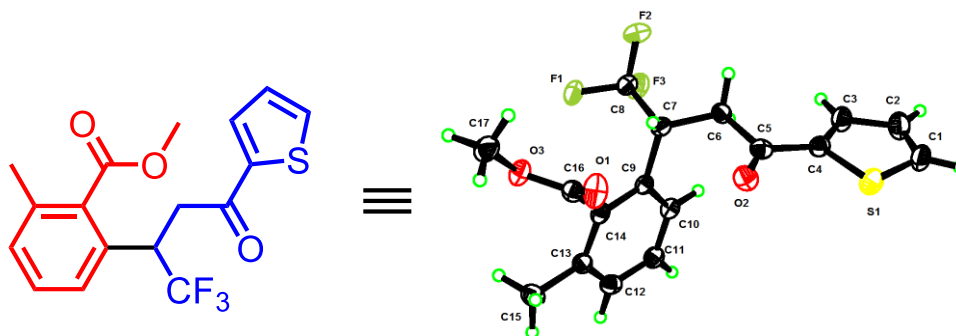

| <b>Table S2. Crystal data and structure refinement for 3ai</b> |                                                                 |
|----------------------------------------------------------------|-----------------------------------------------------------------|
| Identification code                                            | mo_22020163_0m                                                  |
| Empirical formula                                              | C <sub>17</sub> H <sub>15</sub> F <sub>3</sub> O <sub>3</sub> S |
| Formula weight                                                 | 356.35                                                          |
| Temperature/K                                                  | 170.0                                                           |
| Crystal system                                                 | triclinic                                                       |
| Space group                                                    | P-1                                                             |
| a/Å                                                            | 9.9842(4)                                                       |
| b/Å                                                            | 10.3171(3)                                                      |
| c/Å                                                            | 17.4171(7)                                                      |
| $\alpha^\circ$                                                 | 76.4580(10)                                                     |
| $\beta^\circ$                                                  | 89.8730(10)                                                     |
| $\gamma^\circ$                                                 | 70.4810(10)                                                     |
| Volume/Å <sup>3</sup>                                          | 1638.32(11)                                                     |
| Z                                                              | 4                                                               |
| $\rho_{\text{calc}}/\text{cm}^3$                               | 1.445                                                           |
| $\mu/\text{mm}^{-1}$                                           | 0.241                                                           |
| F(000)                                                         | 736.0                                                           |
| Crystal size/mm <sup>3</sup>                                   | 0.16 $\times$ 0.09 $\times$ 0.04                                |

|                                                  |                                                               |
|--------------------------------------------------|---------------------------------------------------------------|
| Radiation                                        | MoK $\alpha$ ( $\lambda = 0.71073$ )                          |
| 2 $\Theta$ range for data collection/ $^{\circ}$ | 4.324 to 52.846                                               |
| Index ranges                                     | $-12 \leq h \leq 12, -12 \leq k \leq 12, -21 \leq l \leq 21$  |
| Reflections collected                            | 18884                                                         |
| Independent reflections                          | 6673 [ $R_{\text{int}} = 0.0465, R_{\text{sigma}} = 0.0586$ ] |
| Data/restraints/parameters                       | 6673/0/437                                                    |
| Goodness-of-fit on $F^2$                         | 1.049                                                         |
| Final R indexes [ $I \geq 2\sigma(I)$ ]          | $R_1 = 0.0508, wR_2 = 0.1388$                                 |
| Final R indexes [all data]                       | $R_1 = 0.0899, wR_2 = 0.1778$                                 |
| Largest diff. peak/hole / $e \text{ \AA}^{-3}$   | 0.22/-0.32                                                    |

**Table S3. Fractional Atomic Coordinates ( $\times 10^4$ ) and Equivalent Isotropic Displacement Parameters ( $\text{\AA}^2 \times 10^3$ ) for mo\_22020163\_0m.  $U_{\text{eq}}$  is defined as 1/3 of the trace of the orthogonalised UIJ tensor.**

| Atom | x          | y          | z          | U(eq)   |
|------|------------|------------|------------|---------|
| S2   | 8527.3(8)  | 9832.8(8)  | 693.6(5)   | 42.9(2) |
| S1   | -721.1(8)  | 6287.9(9)  | 8366.1(5)  | 45.4(2) |
| F6   | 5790.4(18) | 5997.8(17) | 3661.4(10) | 44.5(4) |
| F3   | 4840.6(18) | 8342.5(17) | 6866.7(10) | 46.5(5) |
| F4   | 5884.6(18) | 6973.3(19) | 4611.5(10) | 46.8(5) |
| F5   | 4362.1(16) | 8109.4(18) | 3610.6(10) | 46.6(5) |
| F1   | 6487.7(17) | 6344.6(19) | 6921.6(10) | 50.8(5) |
| F2   | 4625(2)    | 7025(2)    | 6115.4(10) | 53.9(5) |
| O3   | 7962(2)    | 3561.5(19) | 7997.5(12) | 38.2(5) |
| O6   | 7963(2)    | 9562(2)    | 2381.6(12) | 38.5(5) |
| O2   | 2394(2)    | 5086.9(19) | 8224.0(12) | 39.3(5) |
| O1   | 6079(2)    | 2877(2)    | 8260.9(14) | 48.4(6) |
| O4   | 7727(3)    | 8582(2)    | 4984.8(13) | 47.6(6) |
| O5   | 8881(3)    | 9763(2)    | 4159.3(13) | 52.6(6) |
| C9   | 4967(3)    | 6096(3)    | 8302.2(15) | 25.7(6) |
| C14  | 6166(3)    | 4915(3)    | 8657.9(16) | 27.8(6) |
| C20  | 9169(3)    | 7358(3)    | 4148.3(15) | 28.7(6) |
| C16  | 6702(3)    | 3685(3)    | 8283.6(16) | 30.1(6) |
| C10  | 4400(3)    | 7140(3)    | 8710.4(16) | 29.7(6) |

|     |          |         |            |          |
|-----|----------|---------|------------|----------|
| C11 | 5010(3)  | 7020(3) | 9447.2(17) | 32.8(6)  |
| C21 | 8315(3)  | 6934(3) | 3694.6(16) | 28.3(6)  |
| C12 | 6224(3)  | 5880(3) | 9780.7(17) | 33.3(6)  |
| C7  | 4329(3)  | 6261(3) | 7472.8(15) | 28.4(6)  |
| C25 | 10604(3) | 6527(3) | 4377.5(16) | 34.4(6)  |
| C30 | 7356(3)  | 8954(3) | 2061.2(16) | 28.3(6)  |
| C13 | 6829(3)  | 4818(3) | 9384.9(16) | 30.0(6)  |
| C5  | 1866(3)  | 6326(3) | 7852.4(16) | 29.7(6)  |
| C27 | 6775(3)  | 7856(3) | 3407.4(16) | 29.3(6)  |
| C29 | 6480(3)  | 8140(3) | 2506.0(15) | 30.6(6)  |
| C6  | 2725(3)  | 7066(3) | 7325.1(16) | 29.4(6)  |
| C31 | 7445(3)  | 9016(3) | 1213.9(17) | 33.4(6)  |
| C28 | 5716(3)  | 7230(3) | 3822.1(16) | 34.2(6)  |
| C19 | 8594(3)  | 8712(3) | 4406.4(17) | 35.1(7)  |
| C4  | 360(3)   | 7134(3) | 7864.5(16) | 31.3(6)  |
| C22 | 8917(3)  | 5667(3) | 3471.3(17) | 36.0(7)  |
| C8  | 5069(3)  | 6989(3) | 6849.0(17) | 37.8(7)  |
| C24 | 11149(3) | 5258(3) | 4155.1(17) | 38.9(7)  |
| C23 | 10329(3) | 4829(3) | 3703.1(18) | 39.5(7)  |
| C3  | -399(3)  | 8526(3) | 7504.2(19) | 39.6(7)  |
| C15 | 8142(3)  | 3579(3) | 9764.8(18) | 39.1(7)  |
| C17 | 8556(3)  | 2405(3) | 7627.6(19) | 44.5(8)  |
| C2  | -1869(3) | 8895(4) | 7644(2)    | 49.0(8)  |
| C26 | 11544(3) | 6995(4) | 4847(2)    | 51.7(9)  |
| C1  | -2162(3) | 7777(4) | 8097(2)    | 46.4(8)  |
| C32 | 6742(4)  | 8550(4) | 731(2)     | 63.2(11) |
| C34 | 8045(4)  | 9543(4) | -155(2)    | 56.3(9)  |
| C18 | 7168(5)  | 9780(4) | 5333(2)    | 69.5(12) |
| C33 | 7080(5)  | 8865(5) | -64(2)     | 79.6(14) |

**Table S4. Anisotropic Displacement Parameters ( $\text{\AA}^2 \times 10^3$ ) for mo\_22020163\_0m.**

The Anisotropic displacement factor exponent takes the form:  $-2 \pi$

$$^2[h^2a^*2U_{11}+2hka^*b^*U_{12}+\dots].$$

| Atom | U <sub>11</sub> | U <sub>22</sub> | U <sub>33</sub> | U <sub>23</sub> | U <sub>13</sub> | U <sub>12</sub> |
|------|-----------------|-----------------|-----------------|-----------------|-----------------|-----------------|
| S2   | 46.8(5)         | 46.0(5)         | 39.9(5)         | -3.4(3)         | 7.4(4)          | -25.9(4)        |
| S1   | 43.6(5)         | 51.0(5)         | 46.9(5)         | -5.0(4)         | 10.0(4)         | -27.9(4)        |
| F6   | 52.4(11)        | 42.1(10)        | 47.5(11)        | -13.1(8)        | 12.6(9)         | -25.9(8)        |
| F3   | 47.2(10)        | 39.2(10)        | 52.1(12)        | -4.2(8)         | 16.2(9)         | -18.7(8)        |
| F4   | 45.7(10)        | 64.7(12)        | 28.8(10)        | -8.6(8)         | 8.4(8)          | -19.6(9)        |
| F5   | 29.7(9)         | 57.4(11)        | 44.8(11)        | -8.0(8)         | 4.6(8)          | -7.9(8)         |

|     |          |          |          |           |          |           |
|-----|----------|----------|----------|-----------|----------|-----------|
| F1  | 30.3(9)  | 64.6(12) | 44.1(11) | -4.1(9)   | 13.7(8)  | -5.5(8)   |
| F2  | 56.5(11) | 73.4(13) | 27.3(10) | -8.5(9)   | 8.1(9)   | -19.2(10) |
| O3  | 34.8(11) | 35.3(11) | 45.2(13) | -13.0(9)  | 13.7(9)  | -11.1(9)  |
| O6  | 47.6(12) | 34.4(10) | 37.6(12) | -9.8(9)   | -1.4(9)  | -18.8(9)  |
| O2  | 41.0(11) | 30.2(10) | 43.8(12) | 0.0(9)    | -0.8(10) | -14.8(9)  |
| O1  | 40.5(12) | 37.2(11) | 77.5(17) | -25.2(11) | 13.9(11) | -18.9(10) |
| O4  | 71.4(15) | 35.1(11) | 43.9(13) | -19.0(9)  | 21.1(11) | -21.9(11) |
| O5  | 81.7(17) | 41.1(12) | 47.8(14) | -11.0(10) | 8.5(12)  | -37.6(12) |
| C9  | 25.3(13) | 27.5(13) | 26.4(14) | -5.3(11)  | 6.0(11)  | -12.5(11) |
| C14 | 26.5(13) | 27.2(13) | 31.6(15) | -6.3(11)  | 7.9(11)  | -12.1(11) |
| C20 | 34.9(14) | 28.5(13) | 23.8(14) | -1.9(11)  | 4.3(12)  | -15.5(11) |
| C16 | 30.5(14) | 24.4(13) | 32.2(15) | -4.2(11)  | 2.1(12)  | -7.4(11)  |
| C10 | 29.8(14) | 29.2(13) | 32.1(16) | -9.5(11)  | 7.2(12)  | -11.6(11) |
| C11 | 33.7(15) | 33.5(14) | 35.5(16) | -11.6(12) | 7.4(13)  | -15.2(12) |
| C21 | 30.9(14) | 29.1(13) | 26.0(14) | -8.3(11)  | 7.6(11)  | -10.7(11) |
| C12 | 37.8(15) | 38.0(15) | 29.1(15) | -5.0(12)  | 2.7(12)  | -21.6(13) |
| C7  | 30.9(14) | 28.8(13) | 25.4(14) | -7.6(11)  | 4.7(11)  | -9.6(11)  |
| C25 | 34.7(15) | 40.7(16) | 28.7(16) | -2.7(12)  | 5.5(12)  | -17.9(13) |
| C30 | 31.0(14) | 19.6(12) | 29.6(15) | -3.8(10)  | -1.2(12) | -4.2(11)  |
| C13 | 28.1(13) | 30.6(14) | 30.4(15) | -0.4(11)  | 3.1(12)  | -13.9(11) |
| C5  | 36.7(15) | 30.1(14) | 27.4(14) | -8.3(11)  | -0.7(12) | -17.0(12) |
| C27 | 31.0(14) | 27.9(13) | 29.0(15) | -8.1(11)  | 2.9(12)  | -9.5(11)  |
| C29 | 30.8(14) | 34.5(14) | 25.9(15) | -5.8(11)  | 0.3(12)  | -11.9(12) |
| C6  | 27.3(13) | 29.3(13) | 29.6(15) | -4.1(11)  | -0.8(12) | -9.3(11)  |
| C31 | 38.4(15) | 27.4(13) | 35.7(16) | -5.4(11)  | 6.7(13)  | -14.6(12) |
| C28 | 32.6(15) | 40.3(16) | 24.0(15) | -8.2(12)  | 1.5(12)  | -5.2(12)  |
| C19 | 45.8(17) | 36.3(16) | 26.4(15) | -7.6(12)  | -1.9(13) | -18.0(13) |
| C4  | 33.4(15) | 36.1(15) | 29.6(15) | -7.5(12)  | 4.3(12)  | -19.0(12) |
| C22 | 38.0(16) | 36.0(15) | 36.5(17) | -14.2(13) | 4.6(13)  | -12.3(13) |
| C8  | 32.3(15) | 44.2(17) | 30.2(16) | -5.2(13)  | 6.1(13)  | -7.3(13)  |
| C24 | 28.5(14) | 44.5(17) | 35.4(17) | -0.3(13)  | 3.6(13)  | -8.3(13)  |
| C23 | 38.7(16) | 33.0(15) | 40.2(18) | -8.9(13)  | 8.8(14)  | -4.2(13)  |
| C3  | 31.3(15) | 38.6(16) | 47.0(19) | -4.3(13)  | 5.6(14)  | -13.9(13) |
| C15 | 38.6(16) | 36.2(15) | 38.2(17) | -0.6(13)  | -3.3(13) | -13.2(13) |
| C17 | 47.9(18) | 35.8(16) | 41.8(19) | -12.4(13) | 12.0(15) | -2.2(14)  |
| C2  | 33.5(16) | 50.3(19) | 58(2)    | -7.8(16)  | 3.7(15)  | -12.2(14) |
| C26 | 47.3(19) | 56(2)    | 53(2)    | -1.4(16)  | -9.8(16) | -26.4(16) |
| C1  | 32.2(16) | 68(2)    | 48(2)    | -19.8(17) | 12.0(14) | -25.2(15) |
| C32 | 104(3)   | 85(3)    | 39(2)    | -23.0(18) | 24(2)    | -76(3)    |
| C34 | 79(3)    | 67(2)    | 36.7(19) | -10.3(16) | 20.3(18) | -44(2)    |
| C18 | 113(3)   | 43.4(19) | 58(2)    | -28.7(18) | 26(2)    | -23(2)    |
| C33 | 134(4)   | 119(4)   | 39(2)    | -33(2)    | 28(2)    | -102(3)   |

| Atom | Atom | Length/Å |  | Atom | Atom | Length/Å |
|------|------|----------|--|------|------|----------|
| S2   | C31  | 1.717(3) |  | C20  | C19  | 1.497(4) |
| S2   | C34  | 1.677(4) |  | C10  | C11  | 1.383(4) |
| S1   | C4   | 1.720(3) |  | C11  | C12  | 1.386(4) |
| S1   | C1   | 1.685(3) |  | C21  | C27  | 1.525(4) |
| F6   | C28  | 1.343(3) |  | C21  | C22  | 1.391(4) |
| F3   | C8   | 1.346(3) |  | C12  | C13  | 1.396(4) |
| F4   | C28  | 1.338(3) |  | C7   | C6   | 1.527(4) |
| F5   | C28  | 1.346(3) |  | C7   | C8   | 1.509(4) |
| F1   | C8   | 1.340(3) |  | C25  | C24  | 1.386(4) |
| F2   | C8   | 1.341(3) |  | C25  | C26  | 1.508(4) |
| O3   | C16  | 1.329(3) |  | C30  | C29  | 1.502(4) |
| O3   | C17  | 1.441(3) |  | C30  | C31  | 1.466(4) |
| O6   | C30  | 1.222(3) |  | C13  | C15  | 1.510(4) |
| O2   | C5   | 1.223(3) |  | C5   | C6   | 1.506(4) |
| O1   | C16  | 1.202(3) |  | C5   | C4   | 1.458(4) |
| O4   | C19  | 1.339(4) |  | C27  | C29  | 1.538(4) |
| O4   | C18  | 1.447(4) |  | C27  | C28  | 1.513(4) |
| O5   | C19  | 1.196(3) |  | C31  | C32  | 1.359(4) |
| C9   | C14  | 1.406(4) |  | C4   | C3   | 1.372(4) |
| C9   | C10  | 1.391(4) |  | C22  | C23  | 1.386(4) |
| C9   | C7   | 1.529(4) |  | C24  | C23  | 1.377(4) |
| C14  | C16  | 1.502(4) |  | C3   | C2   | 1.424(4) |
| C14  | C13  | 1.397(4) |  | C2   | C1   | 1.355(5) |
| C20  | C21  | 1.398(4) |  | C32  | C33  | 1.414(5) |
| C20  | C25  | 1.403(4) |  | C34  | C33  | 1.357(5) |

| Atom | Atom | Atom | Angle/°   |  | Atom | Atom | Atom | Angle/°  |
|------|------|------|-----------|--|------|------|------|----------|
| C34  | S2   | C31  | 91.83(15) |  | C4   | C5   | C6   | 116.8(2) |
| C1   | S1   | C4   | 91.50(14) |  | C21  | C27  | C29  | 112.4(2) |
| C16  | O3   | C17  | 116.3(2)  |  | C28  | C27  | C21  | 112.5(2) |
| C19  | O4   | C18  | 116.5(2)  |  | C28  | C27  | C29  | 109.1(2) |
| C14  | C9   | C7   | 120.9(2)  |  | C30  | C29  | C27  | 111.4(2) |
| C10  | C9   | C14  | 118.5(2)  |  | C5   | C6   | C7   | 112.9(2) |
| C10  | C9   | C7   | 120.5(2)  |  | C30  | C31  | S2   | 119.2(2) |
| C9   | C14  | C16  | 120.1(2)  |  | C32  | C31  | S2   | 111.0(2) |
| C13  | C14  | C9   | 121.2(2)  |  | C32  | C31  | C30  | 129.8(3) |
| C13  | C14  | C16  | 118.6(2)  |  | F6   | C28  | F5   | 106.1(2) |
| C21  | C20  | C25  | 121.1(2)  |  | F6   | C28  | C27  | 113.3(2) |
| C21  | C20  | C19  | 121.5(2)  |  | F4   | C28  | F6   | 106.4(2) |



|     |     |     |          |  |     |     |     |          |
|-----|-----|-----|----------|--|-----|-----|-----|----------|
| C25 | C20 | C19 | 117.4(2) |  | F4  | C28 | F5  | 105.9(2) |
| O3  | C16 | C14 | 112.7(2) |  | F4  | C28 | C27 | 112.9(2) |
| O1  | C16 | O3  | 123.5(3) |  | F5  | C28 | C27 | 111.8(2) |
| O1  | C16 | C14 | 123.8(2) |  | O4  | C19 | C20 | 110.4(2) |
| C11 | C10 | C9  | 120.6(2) |  | O5  | C19 | O4  | 123.4(3) |
| C10 | C11 | C12 | 120.6(3) |  | O5  | C19 | C20 | 126.2(3) |
| C20 | C21 | C27 | 121.8(2) |  | C5  | C4  | S1  | 119.0(2) |
| C22 | C21 | C20 | 118.7(2) |  | C3  | C4  | S1  | 111.3(2) |
| C22 | C21 | C27 | 119.5(2) |  | C3  | C4  | C5  | 129.7(2) |
| C11 | C12 | C13 | 120.4(3) |  | C23 | C22 | C21 | 120.7(3) |
| C6  | C7  | C9  | 114.8(2) |  | F3  | C8  | C7  | 112.7(2) |
| C8  | C7  | C9  | 110.6(2) |  | F1  | C8  | F3  | 106.1(2) |
| C8  | C7  | C6  | 108.5(2) |  | F1  | C8  | F2  | 106.2(2) |
| C20 | C25 | C26 | 121.5(3) |  | F1  | C8  | C7  | 113.0(2) |
| C24 | C25 | C20 | 118.2(3) |  | F2  | C8  | F3  | 106.5(2) |
| C24 | C25 | C26 | 120.3(3) |  | F2  | C8  | C7  | 111.8(2) |
| O6  | C30 | C29 | 122.1(2) |  | C23 | C24 | C25 | 121.5(3) |
| O6  | C30 | C31 | 120.5(2) |  | C24 | C23 | C22 | 119.8(3) |
| C31 | C30 | C29 | 117.4(2) |  | C4  | C3  | C2  | 112.0(3) |
| C14 | C13 | C15 | 122.0(2) |  | C1  | C2  | C3  | 111.6(3) |
| C12 | C13 | C14 | 118.6(2) |  | C2  | C1  | S1  | 113.5(2) |
| C12 | C13 | C15 | 119.4(3) |  | C31 | C32 | C33 | 112.5(3) |
| O2  | C5  | C6  | 121.4(2) |  | C33 | C34 | S2  | 112.8(3) |
| O2  | C5  | C4  | 121.7(2) |  | C34 | C33 | C32 | 111.8(3) |

**Table S7. Hydrogen Atom Coordinates ( $\text{\AA} \times 10^4$ ) and Isotropic Displacement Parameters ( $\text{\AA}^2 \times 10^3$ ) for mo\_22020163\_0m.**

| Atom | x        | y       | z        | U(eq) |
|------|----------|---------|----------|-------|
| H10  | 3585.85  | 7942.94 | 8480.81  | 36    |
| H11  | 4593.22  | 7724.68 | 9727.17  | 39    |
| H12  | 6647.43  | 5820.21 | 10281.54 | 40    |
| H7   | 4504.91  | 5287.16 | 7398.57  | 34    |
| H27  | 6600.62  | 8793.02 | 3533.86  | 35    |
| H29A | 6703.91  | 7224.12 | 2358.72  | 37    |
| H29B | 5454.97  | 8685.12 | 2354.15  | 37    |
| H6A  | 2521.38  | 8024.48 | 7413.76  | 35    |
| H6B  | 2423.45  | 7182.54 | 6764.72  | 35    |
| H22  | 8354.76  | 5371.93 | 3156.34  | 43    |
| H24  | 12111.57 | 4670.23 | 4318.31  | 47    |
| H23  | 10728.33 | 3961.55 | 3550.63  | 47    |
| H3   | 8.77     | 9167.51 | 7197.74  | 48    |

|      |          |          |          |     |
|------|----------|----------|----------|-----|
| H15A | 7990.07  | 2689.37  | 9760.66  | 59  |
| H15B | 8324.67  | 3602.71  | 10312.94 | 59  |
| H15C | 8962.2   | 3638.76  | 9467.45  | 59  |
| H17A | 7888.72  | 2490.31  | 7191.57  | 67  |
| H17B | 8723.02  | 1501.85  | 8019.22  | 67  |
| H17C | 9461.3   | 2436.29  | 7420.42  | 67  |
| H2   | -2560.22 | 9811.85  | 7444.17  | 59  |
| H26A | 11851.94 | 7712.31  | 4492.28  | 78  |
| H26B | 12382.51 | 6176.01  | 5096.68  | 78  |
| H26C | 11009.81 | 7401.27  | 5257.45  | 78  |
| H1   | -3089.15 | 7827.94  | 8247.96  | 56  |
| H32  | 6095.65  | 8067.11  | 908.68   | 76  |
| H34  | 8408.46  | 9823.73  | -646.87  | 68  |
| H18A | 6562.92  | 10604.71 | 4930.08  | 104 |
| H18B | 7960.18  | 10001.52 | 5534.44  | 104 |
| H18C | 6603     | 9544.43  | 5770.28  | 104 |
| H33  | 6679.62  | 8629.65  | -484.46  | 95  |

## Characterization Data of Starting Materials

*Note:* All starting materials have been prepared according to the previously published procedure.<sup>1</sup>

### *(E)*-4,4,4-trifluoro-1-(*p*-tolyl)but-2-en-1-one (2a).<sup>1</sup>

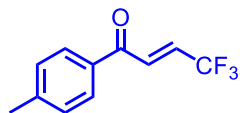

According to the general procedure, the product was isolated with 65%, 4.21 g.

<sup>1</sup>H NMR (400 MHz, CDCl<sub>3</sub>) δ 7.93-7.81 (m, 2 H), 7.53 (dq, *J* = 15.5, 2.0 Hz, 1 H), 7.36-7.29 (m, 2 H), 6.80 (dq, *J* = 15.5, 6.7 Hz, 1 H), 2.45 (s, 3 H).

### *(E)*-4,4,4-trifluoro-1-(*o*-tolyl)but-2-en-1-one (2b).<sup>1</sup>

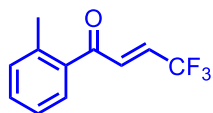

According to the general procedure, the product was isolated with 33%, 142 mg.

$^1\text{H NMR}$  (400 MHz,  $\text{CDCl}_3$ )  $\delta$  7.57 (dd,  $J = 8.0, 1.5$  Hz, 1 H), 7.45 (td,  $J = 7.5, 1.4$  Hz, 1 H), 7.31 (t,  $J = 7.1$  Hz, 2 H), 7.25 (dq,  $J = 15.8, 2.0$  Hz, 1 H), 6.63 (dq,  $J = 15.8, 6.6$  Hz, 1 H), 2.50 (s, 3 H).

**(E)-4,4,4-trifluoro-1-(3-methoxyphenyl)but-2-en-1-one (2c).**<sup>2</sup>

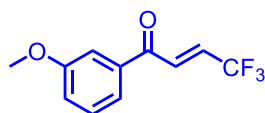

According to the general procedure, the product was isolated with 49%, 226 mg.

$^1\text{H NMR}$  (400 MHz,  $\text{CDCl}_3$ )  $\delta$  7.57-7.48 (m, 3 H), 7.43 (t,  $J = 7.9$  Hz, 1 H), 7.21-7.17 (m, 1 H), 6.82 (dq,  $J = 15.5, 6.6$  Hz, 1 H), 3.88 (s, 3 H).

**(E)-4,4,4-trifluoro-1-(4-methoxyphenyl)but-2-en-1-one (2d).**<sup>1</sup>

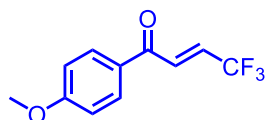

According to the general procedure, the product was isolated with 39%, 360 mg.

$^1\text{H NMR}$  (400 MHz,  $\text{CDCl}_3$ )  $\delta$  8.02-7.95 (m, 2 H), 7.53 (dq,  $J = 15.5, 2.0$  Hz, 1 H), 7.03-6.97 (m, 2 H), 6.80 (dq,  $J = 15.5, 6.7$  Hz, 1 H), 3.90 (s, 3 H).

**(E)-4,4,4-trifluoro-1-(naphthalen-2-yl)but-2-en-1-one (2e).**<sup>1</sup>

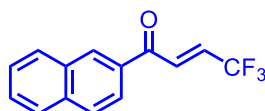

According to the general procedure, the product was isolated with 64%, 322 mg.

<sup>1</sup>H NMR (400 MHz, CDCl<sub>3</sub>) δ 8.50-8.46 (m, 1 H), 8.05 (dd, *J* = 8.7, 1.8 Hz, 1 H), 8.03-8.00 (m, 1 H), 7.96 (d, *J* = 8.7 Hz, 1 H), 7.91 (d, *J* = 8.1 Hz, 1 H), 7.72 (dq, *J* = 15.5, 2.1 Hz, 1 H), 7.66 (ddd, *J* = 8.3, 7.0, 1.4 Hz, 1 H), 7.60 (ddd, *J* = 8.2, 6.9, 1.4 Hz, 1 H), 6.89 (dq, *J* = 15.5, 6.6 Hz, 1 H).

**(*E*)-4,4,4-trifluoro-1-(4-fluorophenyl)but-2-en-1-one (2f).**<sup>3</sup>

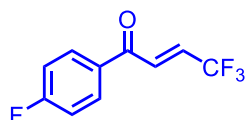

According to the general procedure, the product was isolated with 50%, 219 mg.

<sup>1</sup>H NMR (500 MHz, CDCl<sub>3</sub>) δ 8.06-7.99 (m, 2 H), 7.51 (dq, *J* = 15.5, 2.0 Hz, 1 H), 7.24-7.17 (m, 2 H), 6.83 (dq, *J* = 15.5, 6.6 Hz, 1 H).

**(*E*)-1-(3-bromophenyl)-4,4,4-trifluorobut-2-en-1-one (2g).**<sup>3</sup>

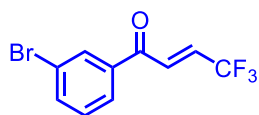

According to the general procedure, the product was isolated with 42%, 235 mg.

<sup>1</sup>H NMR (500 MHz, CDCl<sub>3</sub>) δ 8.11 (t, *J* = 1.8 Hz, 1 H), 7.89 (ddd, *J* = 7.8, 1.7, 1.1 Hz, 1 H), 7.77 (ddd, *J* = 8.0, 2.0, 1.0 Hz, 1 H), 7.48 (dq, *J* = 15.5, 2.0 Hz, 1 H), 7.42 (t, *J* = 7.9 Hz, 1 H), 6.84 (dq, *J* = 15.5, 6.6 Hz, 1 H).

**(*E*)-4,4,4-trifluoro-1-(furan-2-yl)but-2-en-1-one (2h).**<sup>3</sup>

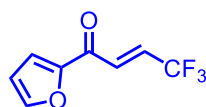

According to the general procedure, the product was isolated with 41%, 156 mg.

$^1\text{H NMR}$  (400 MHz,  $\text{CDCl}_3$ )  $\delta$  7.71 (dd,  $J = 1.7, 0.7$  Hz, 1 H), 7.44 (q,  $J = 15.6, 2.0$  Hz, 1 H), 7.39-7.37 (m, 1 H), 6.90 (dq,  $J = 15.6, 6.7$  Hz, 1 H), 6.64 (dd,  $J = 3.7, 1.7$  Hz, 1 H).

**(*E*)-4,4,4-trifluoro-1-(thiophen-2-yl)but-2-en-1-one (2i).**<sup>1</sup>

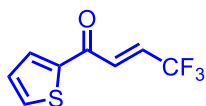

According to the general procedure, the product was isolated with 39%, 160 mg.

$^1\text{H NMR}$  (400 MHz,  $\text{CDCl}_3$ )  $\delta$  7.84 (dd,  $J = 3.9, 1.1$  Hz, 1 H), 7.79 (dd,  $J = 4.9, 1.1$  Hz, 1 H), 7.40 (dq,  $J = 15.5, 2.0$  Hz, 1 H), 7.22 (dd,  $J = 5.0, 3.9$  Hz, 1 H), 6.87 (dq,  $J = 15.5, 6.7$  Hz, 1 H).

**(*E*)-1-(cyclohex-1-en-1-yl)-4,4,4-trifluorobut-2-en-1-one (2j).**

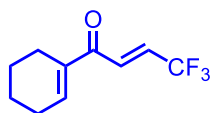

According to the general procedure, the product was isolated with 46%, 190 mg.

$^1\text{H NMR}$  (400 MHz,  $\text{CDCl}_3$ )  $\delta$  7.29 (dq,  $J = 15.9, 2.2$  Hz, 1 H), 7.02 (td,  $J = 3.9, 1.9$  Hz, 1 H), 6.61 (dq,  $J = 15.5, 6.7$  Hz, 1 H), 2.32 (dtp,  $J = 10.5, 4.4, 2.3$  Hz, 4 H), 1.66 (dtdd,  $J = 11.2, 7.0, 4.9, 2.8$  Hz, 4 H);  $^{13}\text{C NMR}$  (126 MHz,  $\text{CDCl}_3$ )  $\delta$  188.40, 144.00, 139.89, 130.59 (q,  $J = 5.7$  Hz), 128.34 (q,  $J = 34.7$  Hz), 122.76 (q,  $J = 268.56$  Hz), 26.45, 23.07, 21.65, 21.38; **HRMS** [ESI] Calcd for  $[\text{M}+\text{H}]^+$   $\text{C}_{10}\text{H}_{12}\text{F}_3\text{O}$ : 205.0835, Found: 205.0839.

**tert-butyl (*E*)-(3-(4,4,4-trifluorobut-2-enoyl)phenyl)carbamate (2k).**

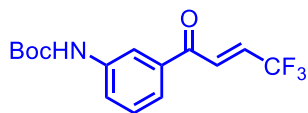

According to the general procedure, the product was isolated with 43%, 2.05 g.

**<sup>1</sup>H NMR** (500 MHz, CDCl<sub>3</sub>) δ 7.94 (t, *J* = 2.0 Hz, 1 H), 7.74 (d, *J* = 8.1 Hz, 1 H), 7.61 (dt, *J* = 7.7, 1.3 Hz, 1 H), 7.50 (dq, *J* = 15.5, 2.0 Hz, 1 H), 7.44 (t, *J* = 7.9 Hz, 1 H), 6.81 (dq, *J* = 15.7, 6.7 Hz, 1 H), 6.77 (s, 1 H), 1.53 (s, 9 H); **<sup>13</sup>C NMR** (126 MHz, CDCl<sub>3</sub>) δ 187.79, 152.62, 139.45, 136.88, 130.99 (q, *J* = 5.5 Hz), 130.42 (q, *J* = 35.2 Hz), 129.68, 124.04, 123.30, 122.55 (d, *J* = 268.53 Hz), 118.34, 81.23, 28.30; **HRMS** [ESI] Calcd for [M+H]<sup>+</sup> C<sub>15</sub>H<sub>17</sub>F<sub>3</sub>NO<sub>3</sub>: 316.1155, Found: 316.1158.

**tert-butyl (*E*)-(4'-(4,4,4-trifluorobut-2-enoyl)-[1,1'-biphenyl]-3-yl)carbamate (2l).**

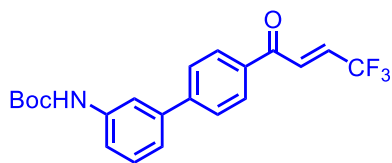

According to the general procedure, the product was isolated with 40%, 790 mg.

**<sup>1</sup>H NMR** (500 MHz, CDCl<sub>3</sub>) δ 8.08-7.98 (m, 2 H), 7.78 (t, *J* = 2.0 Hz, 1 H), 7.76-7.72 (m, 2 H), 7.57 (dq, *J* = 15.6, 2.0 Hz, 1 H), 7.39 (t, *J* = 7.8 Hz, 1 H), 7.31 (ddt, *J* = 12.4, 7.6, 1.3 Hz, 2 H), 6.85 (dq, *J* = 15.5, 6.6 Hz, 1 H), 6.63 (s, 1 H), 1.54 (s, 9 H); **<sup>13</sup>C NMR** (126 MHz, CDCl<sub>3</sub>) δ 187.49, 152.72, 146.64, 140.43, 139.14, 134.97, 131.04 (q, *J* = 5.6 Hz), 130.23 (q, *J* = 35.3 Hz), 129.63, 129.40, 127.71, 122.60 (q, *J* = 268.55 Hz), 121.98, 118.54, 117.33, 80.84, 28.35; **HRMS** [ESI] Calcd for [M+H]<sup>+</sup> C<sub>21</sub>H<sub>21</sub>F<sub>3</sub>NO<sub>3</sub>: 392.1468, Found: 392.1470.

## Characterization Data of Desired Products

**Methyl-2-methyl-6-(1,1,1-trifluoro-4-oxo-4-(*p*-tolyl)butan-2-yl)benzoate (3aa).**

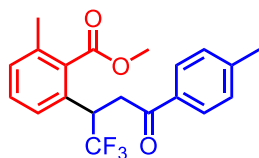

According to the general procedure, the product was isolated with 82%, 28.7 mg.

**<sup>1</sup>H NMR** (400 MHz, CDCl<sub>3</sub>) δ 7.83-7.81 (m, 2 H, ), 7.29-7.28 (m, 2 H, ), 7.24 (d, *J* = 8.0 Hz, 1H), 7.16 (dd, *J* = 5.8, 2.7 Hz, 1 H), 4.52 (qdd, *J* = 9.3, 7.8, 5.0 Hz, 1 H), 3.98 (s, 3 H), 3.63 (dd, *J* = 17.7, 5.1 Hz, 1 H), 3.56 (dd, *J* = 17.7, 7.9 Hz, 1 H), 2.39 (s, 3 H), 2.35 (s, 3 H); **<sup>13</sup>C NMR** (126 MHz, CDCl<sub>3</sub>) δ 194.40, 169.34, 144.38, 136.02, 135.39, 133.70, 132.41, 130.26, 129.72, 129.35, 128.25, 126.78 (q, *J* = 278.31 Hz), 124.84, 52.24, 41.09 (q, *J* = 27.8 Hz), 38.97, 21.65, 20.26; **HRMS** [ESI] Calcd for [M+H]<sup>+</sup> C<sub>20</sub>H<sub>20</sub>F<sub>3</sub>O<sub>3</sub>: 365.1359, Found: 365.1356.

**Methyl-5-methyl-2-(1,1,1-trifluoro-4-oxo-4-(*p*-tolyl)butan-2-yl) benzoate (3ba).**

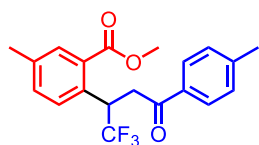

According to the general procedure, the product was isolated with 77%, 28.0 mg.

**<sup>1</sup>H NMR** (400 MHz, CDCl<sub>3</sub>) δ 7.84 (d, *J* = 1.9 Hz, 1 H), 7.82 (d, *J* = 1.7 Hz, 1 H), 7.76 (d, *J* = 2.0 Hz, 1 H), 7.40 (d, *J* = 8.1 Hz, 1 H), 7.31–7.28 (m, 1 H), 7.26 (d, *J* = 8.0 Hz, 2 H), 5.66 (pd, *J* = 9.6, 4.7 Hz, 1 H), 3.98 (s, 3 H), 3.69 (dd, *J* = 17.7, 9.3 Hz, 1 H), 3.62 (dd, *J* = 17.7, 4.7 Hz, 1 H), 2.42 (s, 3 H), 2.36 (s, 3 H); **<sup>13</sup>C NMR** (100 MHz, CDCl<sub>3</sub>) δ 194.85, 167.98, 144.29, 137.73, 133.83, 132.73, 132.73, 131.71, 131.47, 129.32, 127.10 (q, *J* = 278.02 Hz), 128.17, 127.83, 52.34, 38.69 (q, *J* = 27.8 Hz), 38.67, 21.64, 20.90; **HRMS** [ESI] Calcd for [M+H]<sup>+</sup> C<sub>20</sub>H<sub>20</sub>F<sub>3</sub>O<sub>3</sub>: 365.1359, Found: 365.1359.

**Methyl-2-methoxy-6-(1,1,1-trifluoro-4-oxo-4-(*p*-tolyl)butan-2-yl)benzoate (3ca).**

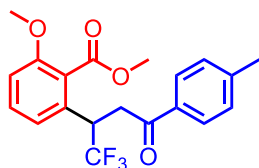

According to the general procedure, the product was isolated with 74%, 28.0 mg.

**<sup>1</sup>H NMR** (400 MHz, CDCl<sub>3</sub>) δ 7.88–7.77 (m, 2 H), 7.35 (t, *J* = 8.2 Hz, 1 H), 7.26 (d, *J* = 2.8 Hz, 2 H), 7.05 (dt, *J* = 8.1, 1.2 Hz, 1 H), 6.89 (dd, *J* = 8.4, 0.8 Hz, 1 H), 4.48–4.33 (m, 1 H), 3.97 (s, 3 H), 3.82 (s, 3 H), 3.61 (dd, *J* = 17.6, 5.2 Hz, 1 H), 3.54 (dd, *J* = 17.5, 7.8 Hz, 1 H), 2.40 (s, 3 H); **<sup>13</sup>C NMR** (126 MHz, CDCl<sub>3</sub>) δ 194.23, 167.65, 156.75, 144.37, 133.70, 130.86, 129.36, 128.26, 126.63 (q, *J* = 278.51 Hz), 125.45, 119.46, 119.45, 110.98, 55.96, 52.52, 41.19 (q, *J* = 27.8 Hz), 38.78, 21.66; **HRMS** [ESI] Calcd for [M+H]<sup>+</sup> C<sub>20</sub>H<sub>20</sub>F<sub>3</sub>O<sub>4</sub>: 381.1308, Found: 381.1312.

**Methyl-3-(1,1,1-trifluoro-4-oxo-4-(*p*-tolyl)butan-2-yl)-[1,1'-biphenyl]-2-carboxylate (3da).**

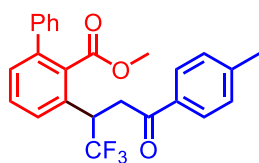

According to the general procedure, the product was isolated with 58%, 24.5 mg.

**<sup>1</sup>H NMR** (400 MHz, CDCl<sub>3</sub>) δ 7.87–7.79 (m, 2 H), 7.50–7.43 (m, 2 H), 7.41–7.32 (m, 6 H), 7.28–7.22 (m, 2 H), 4.78–4.64 (m, 1H), 3.68 (dd, *J* = 17.7, 5.2 Hz, 1 H), 3.62 (dd, *J* = 17.9, 8.0 Hz, 1 H), 3.57 (s, 3 H), 2.40 (s, 3 H); **<sup>13</sup>C NMR** (100 MHz, CDCl<sub>3</sub>) δ 194.33, 169.27, 144.39, 141.29, 140.75, 134.72, 133.71, 133.04, 129.82, 129.37, 128.30, 128.27, 127.54, 126.78 (q, *J* = 278.65 Hz), 126.40, 52.13, 40.74 (q, *J* = 27.8 Hz), 39.01, 21.67; **HRMS** [ESI] Calcd for [M+H]<sup>+</sup> C<sub>25</sub>H<sub>22</sub>F<sub>3</sub>O<sub>3</sub>: 427.1516, Found: 427.1527.



**Methyl-2-(1,1,1-trifluoro-4-oxo-4-(*p*-tolyl)butan-2-yl)-1-naphthoate (3ea).**

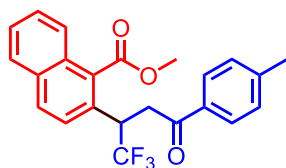

According to the general procedure, the product was isolated with 75%, 35.0 mg.

**<sup>1</sup>H NMR** (400 MHz, CDCl<sub>3</sub>) δ 7.91 (d, *J* = 9.0 Hz, 1 H), 7.90–7.86 (m, 1 H), 7.83 (td, *J* = 6.6, 1.7 Hz, 3 H), 7.60–7.56 (m, 1 H), 7.55–7.48 (m, 2 H), 7.23 (d, *J* = 8.0 Hz, 2 H), 4.77 (qdd, *J* = 9.3, 7.8, 4.9 Hz, 1 H), 4.12 (s, 3 H), 3.73 (dd, *J* = 17.6, 5.0 Hz, 1 H), 3.64 (dd, *J* = 17.6, 7.8 Hz, 1 H), 2.39 (s, 3 H); **<sup>13</sup>C NMR** (100 MHz, CDCl<sub>3</sub>) δ 194.28, 169.00, 144.47, 133.65, 133.09, 132.73, 130.61, 130.06, 129.98, 129.39, 128.26, 128.00, 127.50, 126.91, 126.83 (q, *J* = 278.59 Hz), 125.66, 123.90, 52.64, 41.61 (q, *J* = 27.6 Hz), 38.68, 21.65; **<sup>19</sup>F NMR** (476 MHz, CDCl<sub>3</sub>) δ -68.31 (CF<sub>3</sub>); **HRMS** [ESI] Calcd for [M+H]<sup>+</sup> C<sub>23</sub>H<sub>20</sub>F<sub>3</sub>O<sub>3</sub>: 401.1359, Found: 401.1370.

**Methyl-2-(phenylamino)-6-(1,1,1-trifluoro-4-oxo-4-(*p*-tolyl)butan-2-yl)benzoate (3fa).**

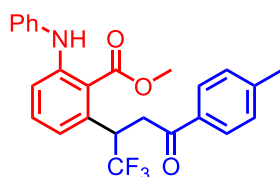

According to the general procedure, the product was isolated with 64%, 28.0 mg.

**<sup>1</sup>H NMR** (400 MHz, CDCl<sub>3</sub>) δ 7.87–7.77 (m, 2 H), 7.67 (s, 1 H), 7.31–7.25 (m, 3 H), 7.24–7.18 (m, 3 H), 7.12–7.04 (m, 2 H), 7.02–6.97 (m, 1 H), 6.94 (dt, *J* = 7.4, 1.3 Hz, 1 H), 5.1–4.82 (m, 1 H), 4.00 (s, 3 H), 3.71–3.53 (m, 2 H), 2.40 (s, 3 H); **<sup>13</sup>C NMR** (100 MHz, CDCl<sub>3</sub>) δ 194.82, 168.75, 144.45, 141.53, 135.68, 133.75, 131.42, 129.38, 128.24, 127.04 (q, *J* = 278.98 Hz), 122.53, 120.62, 120.51, 118.77, 115.90, 52.44,

40.69 (q,  $J = 27.2$  Hz), 39.29, 21.67; **HRMS** [ESI] Calcd for  $[M+H]^+$   $C_{25}H_{23}F_3NO_3$ : 442.1625, Found: 442.1635.

**Methyl-2-acetyl-6-(1,1,1-trifluoro-4-oxo-4-(*p*-tolyl)butan-2-yl)benzoate (3ga).**

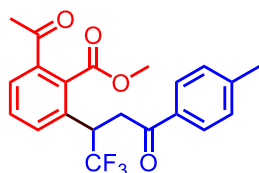

According to the general procedure, the product was isolated with 98%, 38.5 mg.

**$^1H$  NMR** (400 MHz,  $CDCl_3$ )  $\delta$  7.87–7.81 (m, 2 H), 7.76 (dd,  $J = 7.8, 1.1$  Hz, 1 H), 7.69 (dt,  $J = 8.0, 1.2$  Hz, 1 H), 7.53 (t,  $J = 7.9$  Hz, 1 H), 7.27 (d,  $J = 8.0$  Hz, 2 H), 4.63 (pd,  $J = 8.9, 5.0$  Hz, 1 H), 3.96 (s, 3 H), 3.70 (dd,  $J = 17.6, 5.0$  Hz, 1 H), 3.55 (dd,  $J = 17.5, 8.1$  Hz, 1 H), 2.59 (s, 3 H), 2.42 (s, 3 H);  **$^{13}C$  NMR** (100 MHz,  $CDCl_3$ )  $\delta$  198.44, 194.00, 168.79, 144.56, 137.55, 134.60, 133.86, 133.49, 131.33, 129.88, 129.41, 128.65, 128.25, 126.49 (q,  $J = 278.66$  Hz), 52.84, 40.63 (q,  $J = 27.9$  Hz), 38.85, 27.72, 21.66; **HRMS** [ESI] Calcd for  $[M+H]^+$   $C_{21}H_{20}F_3O_4$ : 393.1308, Found: 393.1314.

**Methyl-5-acetyl-2-(1,1,1-trifluoro-4-oxo-4-(*p*-tolyl)butan-2-yl)benzoate (3ha).**

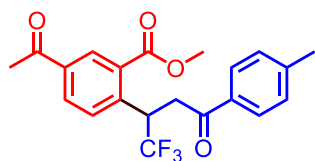

According to the general procedure, the product was isolated with 70%, 27.6 mg.

**$^1H$  NMR** (400 MHz,  $CDCl_3$ )  $\delta$  8.51 (d,  $J = 2.0$  Hz, 1 H), 8.03 (dd,  $J = 8.3, 2.0$  Hz, 1 H), 7.82–7.75 (m, 2 H), 7.62–7.52 (m, 1 H), 7.26–7.21 (m, 2 H), 5.76 (pd,  $J = 9.6, 4.4$  Hz, 1 H), 4.02 (s, 3 H), 3.74 (dd,  $J = 17.9, 9.8$  Hz, 1 H), 3.67 (dd,  $J = 18.0, 4.4$  Hz, 1 H), 2.61 (s, 3 H), 2.39 (s, 3 H);  **$^{13}C$  NMR** (100 MHz,  $CDCl_3$ )  $\delta$  196.66, 194.49, 167.07, 144.63, 140.84, 136.31, 133.52, 132.44, 131.23, 130.88, 129.41, 128.39,

128.15, 126.71 (q,  $J = 278.46$  Hz), 52.72, 39.12 (q,  $J = 27.7$  Hz), 38.57, 26.60, 21.66;

**HRMS** [ESI] Calcd for  $[M+H]^+$   $C_{21}H_{20}F_3O_4$ : 393.1308, Found: 393.1317.

**Methyl-2-benzoyl-6-(1,1,1-trifluoro-4-oxo-4-(*p*-tolyl)butan-2-yl)benzoate (3ia).**

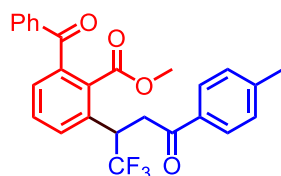

According to the general procedure, the product was isolated with 83%, 37.5 mg.

**$^1H$  NMR** (400 MHz,  $CDCl_3$ )  $\delta$  7.85–7.80 (m, 2 H), 7.79–7.74 (m, 2 H), 7.67 (dd,  $J = 7.8, 1.6$  Hz, 1 H), 7.61–7.56 (m, 1 H), 7.53 (t,  $J = 7.7$  Hz, 1 H), 7.46 (ddd,  $J = 7.6, 4.6, 3.3$  Hz, 3 H), 7.25 (d,  $J = 8.1$  Hz, 2 H), 5.15–5.00 (m, 1 H), 3.71–3.60 (m, 2 H), 3.58 (s, 3 H), 2.40 (s, 3 H);  **$^{13}C$  NMR** (100 MHz,  $CDCl_3$ )  $\delta$  196.06, 194.23, 167.41, 144.51, 140.06, 136.71, 134.73, 133.91, 133.61, 133.22, 130.31, 130.04, 129.78, 129.40, 128.86, 128.52, 128.22, 126.74 (q,  $J = 278.34$  Hz), 52.45, 39.88 (q,  $J = 27.8$  Hz), 38.89, 21.67; **HRMS** [ESI] Calcd for  $[M+H]^+$   $C_{26}H_{22}F_3O_4$ : 455.1465, Found: 455.1477.

**Methyl-2-(1,1,1-trifluoro-4-oxo-4-(*p*-tolyl)butan-2-yl)-6-(trifluoromethyl)benzoate (3ja).**

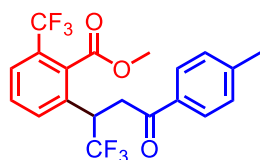

According to the general procedure, the product was isolated with 25%, 10.4 mg.

**$^1H$  NMR** (400 MHz,  $CDCl_3$ )  $\delta$  7.87–7.82 (m, 2 H), 7.71 (t,  $J = 7.8$  Hz, 2 H), 7.58 (t,  $J = 7.9$  Hz, 1 H), 7.28 (d,  $J = 7.9$  Hz, 2 H), 4.60 (pd,  $J = 8.9, 4.8$  Hz, 1 H), 4.03 (s, 3 H), 3.72 (dd,  $J = 17.7, 4.9$  Hz, 1 H), 3.57 (dd,  $J = 17.7, 8.0$  Hz, 1 H), 2.43 (s, 3 H);  **$^{13}C$**

**NMR** (126 MHz, CDCl<sub>3</sub>)  $\delta$  193.77, 167.02, 144.68, 133.95 (q,  $J = 2.2$  Hz), 133.45 (q,  $J = 2.2$  Hz), 133.37, 131.08, 130.06, 129.44, 128.67 (q,  $J = 32.1$  Hz), 128.22, 126.35 (q,  $J = 4.7$  Hz), 126.34 (q,  $J = 278.51$  Hz), 123.24 (q,  $J = 272.20$  Hz), 53.11, 40.75 (q,  $J = 27.8$  Hz), 38.81, 21.70; **HRMS** [ESI] Calcd for [M+H]<sup>+</sup> C<sub>20</sub>H<sub>17</sub>F<sub>6</sub>O<sub>3</sub>: 419.1076, Found: 419.1089.

**Methyl-2-(1,1,1-trifluoro-4-oxo-4-(*p*-tolyl)butan-2-yl)cyclohex-1-ene-1-carboxylate (3ka).**

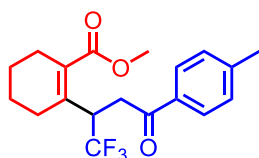

According to the general procedure, the product was isolated with 68%, 24.2 mg.

**<sup>1</sup>H NMR** (400 MHz, CDCl<sub>3</sub>)  $\delta$  7.88–7.74 (m, 2 H), 7.32–7.24 (m, 2 H), 5.07 (qdd,  $J = 10.1, 7.8, 5.9$  Hz, 1 H), 3.71 (s, 3 H), 3.37–3.26 (m, 2 H), 2.42 (s, 3 H), 2.33 (dh,  $J = 8.4, 2.6$  Hz, 2 H), 2.19 (m, 1 H), 2.12–2.03 (m, 1 H), 1.59 (m, 4 H); **<sup>13</sup>C NMR** (100 MHz, CDCl<sub>3</sub>)  $\delta$  195.20, 168.96, 144.32, 137.42, 133.83, 132.25, 129.40, 128.24, 126.80 (q,  $J = 278.4$  Hz), 51.63, 41.29 (q,  $J = 27.8$  Hz), 35.18, 27.37, 25.81, 21.82, 21.67, 21.64. ; **HRMS** [ESI] Calcd for [M+H]<sup>+</sup> C<sub>19</sub>H<sub>22</sub>F<sub>3</sub>O<sub>3</sub>: 355.1516, Found: 355.1522.

**Methyl-2-(1,1,1-trifluoro-4-oxo-4-(*p*-tolyl)butan-2-yl)cyclopent-1-ene-1-carboxylate (3la).**

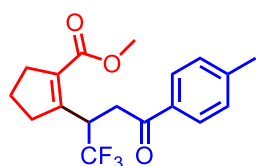

According to the general procedure, the product was isolated with 59%, 19.8 mg.

**<sup>1</sup>H NMR** (400 MHz, CDCl<sub>3</sub>)  $\delta$  7.90–7.83 (m, 2 H), 7.30 (d,  $J = 8.3$  Hz, 2 H), 5.26 (pd,

$J = 9.8, 4.3$  Hz, 1 H), 3.74 (s, 3 H), 3.41 (dd,  $J = 16.9, 4.4$  Hz, 1 H), 3.32 (dd,  $J = 16.9, 9.8$  Hz, 1 H), 2.66 (td,  $J = 7.6, 3.9$  Hz, 2 H), 2.63–2.54 (m, 1 H), 2.52–2.46 (m, 1 H), 2.44 (s, 3 H), 1.9–1.77 (m, 2 H);  $^{13}\text{C NMR}$  (126 MHz,  $\text{CDCl}_3$ )  $\delta$  195.07, 165.59, 148.07, 144.45, 134.39, 133.65, 129.44, 128.21, 126.47 (q,  $J = 280.7$  Hz), 51.38, 38.79 (q,  $J = 27.6$  Hz), 35.70, 34.28, 33.61, 21.69, 21.39; **HRMS** [ESI] Calcd for  $[\text{M}+\text{H}]^+$   $\text{C}_{18}\text{H}_{20}\text{F}_3\text{O}_3$ : 341.1359, Found: 341.1366.

**Methyl-(Z)-2-methyl-6-oxo-6-(*p*-tolyl)-4-(trifluoromethyl)hex-2-enoate (3ma).**

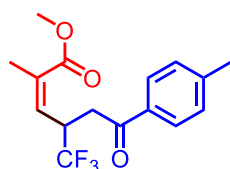

According to the general procedure, the product was isolated with 95%, 29.8 mg.

$^1\text{H NMR}$  (400 MHz,  $\text{CDCl}_3$ )  $\delta$  8.01–7.61 (m, 2 H), 7.26 (d,  $J = 8.0$  Hz, 2 H), 5.77 (dq,  $J = 10.0, 1.6$  Hz, 1 H), 4.84 (ddt,  $J = 13.5, 9.0, 4.6$  Hz, 1 H), 3.75 (s, 3 H), 3.40 (dd,  $J = 17.1, 4.6$  Hz, 1 H), 3.10 (dd,  $J = 17.1, 8.1$  Hz, 1 H), 2.41 (s, 3 H), 1.95 (d,  $J = 1.6$  Hz, 3 H);  $^{13}\text{C NMR}$  (100 MHz,  $\text{CDCl}_3$ )  $\delta$  194.83, 167.24, 144.34, 133.85, 133.39, 132.52, 132.50, 132.47, 129.38, 128.22, 126.70 (q,  $J = 278.07$  Hz), 51.76, 39.01 (q,  $J = 27.6$  Hz), 37.85, 21.63, 20.90;  $^{19}\text{F NMR}$  (471 MHz,  $\text{CDCl}_3$ )  $\delta$  -70.71 ( $\text{CF}_3$ ); **HRMS** [ESI] Calcd for  $[\text{M}+\text{H}]^+$   $\text{C}_{16}\text{H}_{18}\text{F}_3\text{O}_3$ : 315.1203, Found: 315.1209.

**Methyl-(Z)-6-oxo-2-phenyl-6-(*p*-tolyl)-4-(trifluoromethyl)hex-2-enoate (3na).**

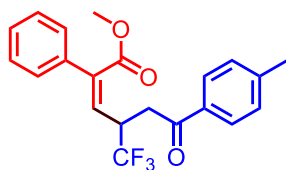

According to the general procedure, the product was isolated with 91%, 34.4 mg.

**<sup>1</sup>H NMR** (400 MHz, CDCl<sub>3</sub>) δ 7.88–7.82 (m, 2 H), 7.35–7.22 (m, 7 H), 6.02 (d, *J* = 10.3 Hz, 1 H), 4.63 (ddd, *J* = 8.4, 4.8, 1.9 Hz, 1 H), 3.81 (s, 3 H), 3.47 (dd, *J* = 17.1, 4.7 Hz, 1 H), 3.22 (dd, *J* = 17.1, 7.9 Hz, 1 H), 2.41 (s, 3 H); **<sup>13</sup>C NMR** (100 MHz, CDCl<sub>3</sub>) δ 194.58, 167.21, 144.48, 139.72, 136.96, 133.81, 131.16, 131.14, 129.45, 128.46, 128.36, 128.29, 127.66, 126.61 (q, *J* = 278.01 Hz), 52.21, 39.69 (q, *J* = 27.9 Hz), 37.84, 21.68; **<sup>19</sup>F NMR** (471 MHz, CDCl<sub>3</sub>) δ -70.40 (CF<sub>3</sub>); **HRMS** [ESI] Calcd for [M+H]<sup>+</sup> C<sub>21</sub>H<sub>20</sub>F<sub>3</sub>O<sub>3</sub>: 377.1359, Found: 377.1370.

**Methyl-5-(1,1,1-trifluoro-4-oxo-4-(*p*-tolyl)butan-2-yl)-3,4-dihydro-2H-pyran-6-carboxylate (3oa).**

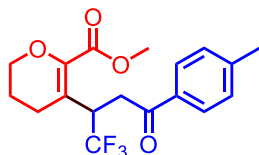

According to the general procedure, the product was isolated with 48%, 17.0 mg.

**<sup>1</sup>H NMR** (400 MHz, CDCl<sub>3</sub>) δ 7.92–7.83 (m, 2 H), 7.30 (d, *J* = 8.5 Hz, 2 H), 5.28 (ddt, *J* = 13.8, 9.8, 4.5 Hz, 1 H), 4.10 (dddd, *J* = 10.4, 6.9, 3.4, 1.0 Hz, 1 H), 4.00 (dddd, *J* = 10.8, 7.4, 3.4, 1.0 Hz, 1 H), 3.79 (s, 3 H), 3.35 (d, *J* = 1.6 Hz, 1 H), 3.34–3.28 (m, 1 H), 2.44 (s, 3 H), 2.25 (dt, *J* = 18.1, 6.3 Hz, 1 H), 2.15 (dt, *J* = 17.9, 6.5 Hz, 1 H), 1.90 (dq, *J* = 10.5, 3.3 Hz, 1 H), 1.83 (ddd, *J* = 13.8, 6.8, 3.3 Hz, 1 H); **<sup>13</sup>C NMR** (126 MHz, CDCl<sub>3</sub>) δ 195.28, 163.35, 144.42, 143.93, 133.71, 129.45, 128.23, 126.91 (q, *J* = 279.47 Hz), 114.51, 65.98, 52.29, 39.30 (q, *J* = 27.4 Hz), 34.84, 21.69, 21.44, 21.28; **HRMS** [ESI] Calcd for [M+H]<sup>+</sup> C<sub>18</sub>H<sub>20</sub>F<sub>3</sub>O<sub>4</sub>: 357.1308, Found: 357.1315.

**Methyl-1-methyl-3-(1,1,1-trifluoro-4-oxo-4-(*p*-tolyl)butan-2-yl)-1H-indole-2-carboxylate (3pa).**

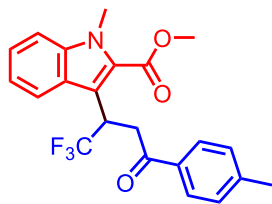

According to the general procedure, the product was isolated with 45%, 18.0 mg.

**<sup>1</sup>H NMR** (400 MHz, CDCl<sub>3</sub>) δ 7.93–7.86 (m, 1 H), 7.85–7.79 (m, 2 H), 7.47–7.33 (m, 2 H), 7.27–7.18 (m, 3 H), 5.74–5.56 (m, 1 H), 4.06 (s, 3 H), 4.00 (s, 3 H), 3.97–3.88 (m, 1 H), 3.80–3.72 (m, 1 H), 2.40 (s, 3 H); **<sup>13</sup>C NMR** (100 MHz, CDCl<sub>3</sub>) δ 195.20, 162.67, 144.21, 138.75, 133.79, 130.00, 129.29, 129.14, 128.13, 127.97, 127.49 (q, *J* = 278.33 Hz), 125.72, 124.92, 121.99, 120.77, 114.84, 110.72, 52.12, 37.45, 36.57 (q, *J* = 29.1 Hz), 32.31, 21.63.; **HRMS** [ESI] Calcd for [M+H]<sup>+</sup> C<sub>22</sub>H<sub>21</sub>F<sub>3</sub>NO<sub>3</sub>: 404.1468, Found: 404.1476.

**Methyl-2-methyl-6-(1,1,1-trifluoro-4-oxo-4-(*o*-tolyl)butan-2-yl)benzoate (3ab).**

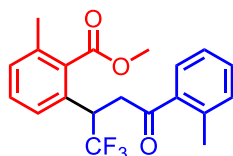

According to the general procedure, the product was isolated with 64%, 23.5 mg.

**<sup>1</sup>H NMR** (400 MHz, CDCl<sub>3</sub>) δ 7.56 (dd, *J* = 7.8, 1.4 Hz, 1 H), 7.37 (td, *J* = 7.5, 1.4 Hz, 1 H), 7.31 (d, *J* = 5.7 Hz, 2 H), 7.28–7.24 (m, 1 H), 7.22 (d, *J* = 8.0 Hz, 1 H), 7.20–7.16 (m, 1 H), 4.51 (qdd, *J* = 9.3, 7.5, 5.6 Hz, 1 H), 3.96 (s, 3 H), 3.57 (dd, *J* = 17.3, 5.6 Hz, 1 H), 3.43 (dd, *J* = 17.3, 7.5 Hz, 1 H), 2.35 (s, 3 H), 2.34 (s, 3 H).; **<sup>13</sup>C NMR** (126 MHz, CDCl<sub>3</sub>) δ 198.69, 169.28, 138.50, 137.07, 135.99, 135.24, 132.18, 132.17, 132.03, 131.61, 130.28, 129.77, 128.12, 127.77, 126.66 (q, *J* = 278.35 Hz), 125.69, 125.07, 52.29, 41.15 (q, *J* = 27.8 Hz), 40.82, 20.93, 20.25.; **HRMS** [ESI] Calcd for [M+H]<sup>+</sup> C<sub>20</sub>H<sub>20</sub>F<sub>3</sub>O<sub>3</sub>: 365.1359, Found: 365.1353.

**Methyl-2-methyl-6-(1,1,1-trifluoro-4-(3-methoxyphenyl)-4-oxobutan-2-yl)benzoate**

te (3ac).

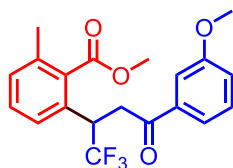

According to the general procedure, the product was isolated with 89%, 34.0 mg.

$^1\text{H NMR}$  (400 MHz,  $\text{CDCl}_3$ )  $\delta$  7.51 (dt,  $J = 7.7, 1.2$  Hz, 1 H), 7.44 (dd,  $J = 2.7, 1.6$  Hz, 1 H), 7.36 (t,  $J = 8.0$  Hz, 1 H), 7.29 (d,  $J = 4.7$  Hz, 2 H), 7.18 (q,  $J = 4.4$  Hz, 1 H), 7.11 (ddd,  $J = 8.3, 2.7, 0.9$  Hz, 1 H), 4.57–4.41 (m, 1 H), 3.98 (s, 3 H), 3.82 (s, 3 H), 3.68–3.54 (m, 2 H), 2.36 (s, 3 H).;  $^{13}\text{C NMR}$  (100 MHz,  $\text{CDCl}_3$ )  $\delta$  194.66, 169.33, 159.90, 137.48, 136.06, 135.39, 132.26, 130.32, 129.76, 129.66, 126.72 (q,  $J = 278.24$  Hz), 124.79, 120.67, 120.15, 112.28, 55.47, 52.26, 41.12 (q,  $J = 27.8$  Hz), 39.18, 20.27; **HRMS** [ESI] Calcd for  $[\text{M}+\text{H}]^+$   $\text{C}_{20}\text{H}_{20}\text{F}_3\text{O}_4$ : 381.1308, Found: 381.1318.

**Methyl-2-methyl-6-(1,1,1-trifluoro-4-(4-methoxyphenyl)-4-oxobutan-2-yl)benzoate (3ad).**

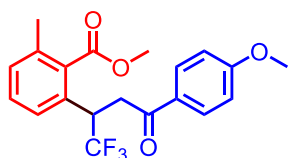

According to the general procedure, the product was isolated with 92%, 35.0 mg.

$^1\text{H NMR}$  (400 MHz,  $\text{CDCl}_3$ )  $\delta$  7.97–7.83 (m, 2 H), 7.33–7.28 (m, 2 H), 7.16 (dd,  $J = 5.7, 3.1$  Hz, 1 H), 6.95–6.85 (m, 2 H), 4.57–4.42 (m, 1 H), 3.98 (s, 3 H), 3.85 (s, 3 H), 3.64–3.57 (dd,  $J = 17.5, 5.7$  Hz, 1 H), 3.53 (dd,  $J = 17.5, 7.9$  Hz, 1 H), 2.35 (s, 3 H).;  $^{13}\text{C NMR}$  (100 MHz,  $\text{CDCl}_3$ )  $\delta$  193.32, 169.34, 163.78, 136.01, 135.39, 132.42, 130.43, 130.24, 129.70, 129.26, 126.80 (q,  $J = 278.22$  Hz), 124.84, 122.63, 113.82, 55.50, 52.24, 41.14 (q,  $J = 27.8$  Hz), 38.70, 20.25; **HRMS** [ESI] Calcd for  $[\text{M}+\text{H}]^+$   $\text{C}_{20}\text{H}_{20}\text{F}_3\text{O}_4$ : 381.1308, Found: 381.1312.



**Methyl-2-methyl-6-(1,1,1-trifluoro-4-(naphthalen-2-yl)-4-oxobutan-2-yl)benzoate**  
**(3ae).**

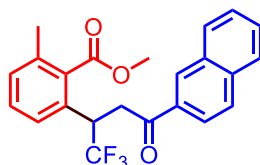

According to the general procedure, the product was isolated with 78%, 31.0 mg.

**<sup>1</sup>H NMR** (400 MHz, CDCl<sub>3</sub>) δ 8.49–8.40 (m, 1 H), 7.97 (ddd, *J* = 9.8, 8.4, 1.6 Hz, 2 H), 7.88–7.80 (m, 2 H), 7.57 (dddd, *J* = 19.3, 8.2, 6.9, 1.4 Hz, 2 H), 7.36 (d, *J* = 7.9 Hz, 1 H), 7.30 (t, *J* = 7.7 Hz, 1 H), 7.21–7.14 (m, 1 H), 4.58 (qdd, *J* = 9.3, 7.6, 5.2 Hz, 1 H), 3.98 (s, 3 H), 3.8–3.68 (m, 2 H), 2.36 (s, 3 H); **<sup>13</sup>C NMR** (100 MHz, CDCl<sub>3</sub>) δ 194.79, 169.37, 136.10, 135.74, 135.42, 133.48, 132.43, 132.36, 130.34, 129.87, 129.79, 129.60, 128.73, 128.59, 127.80, 126.95, 126.81 (q, *J* = 278.98 Hz), 124.87, 123.76, 52.28, 41.26 (q, *J* = 27.7 Hz), 39.23, 20.29; **HRMS** [ESI] Calcd for [M+H]<sup>+</sup> C<sub>23</sub>H<sub>20</sub>F<sub>3</sub>O<sub>3</sub>: 401.1359, Found: 401.1361.

**Methyl-2-methyl-6-(1,1,1-trifluoro-4-(4-fluorophenyl)-4-oxobutan-2-yl)benzoate**  
**(3af).**

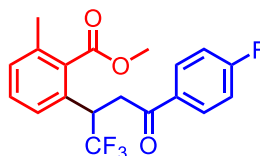

According to the general procedure, the product was isolated with 88%, 32.3 mg.

**<sup>1</sup>H NMR** (400 MHz, CDCl<sub>3</sub>) δ 8.00–7.91 (m, 2 H), 7.30 (d, *J* = 5.3 Hz, 2 H), 7.21–7.15 (m, 1 H), 7.14–7.08 (m, 2 H), 4.51 (qdd, *J* = 9.3, 7.8, 5.1 Hz, 1 H), 3.99 (s, 3 H), 3.62 (dd, *J* = 17.7, 5.1 Hz, 1 H), 3.56 (dd, *J* = 17.7, 7.8 Hz, 1 H), 2.35 (s, 3 H); **<sup>13</sup>C NMR** (100 MHz, CDCl<sub>3</sub>) δ 193.28, 169.31, 165.96 (d, *J* = 255.6 Hz), 136.12,

135.36, 132.58 (d,  $J = 3.1$  Hz), 132.21, 130.86, 130.76, 130.37, 129.78, 126.68 (q,  $J = 278.32$  Hz), 124.77, 115.95, 115.73, 52.28, 41.07 (q,  $J = 28.0$  Hz), 39.05, 20.28; **HRMS** [ESI] Calcd for  $[M+H]^+$   $C_{19}H_{17}F_3O_3$ : 369.1108, Found: 369.1109.

**Methyl-2-(4-(3-bromophenyl)-1,1,1-trifluoro-4-oxobutan-2-yl)-6-methylbenzoate (3ag).**

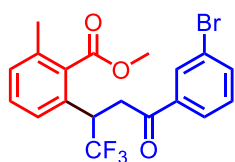

According to the general procedure, the product was isolated with 36%, 15.4 mg.

**$^1H$  NMR** (500 MHz,  $CDCl_3$ )  $\delta$  8.05 (t,  $J = 1.8$  Hz, 1 H), 7.85 (ddd,  $J = 7.8, 1.7, 1.1$  Hz, 1 H), 7.69 (ddd,  $J = 7.9, 2.0, 1.0$  Hz, 1 H), 7.34 (t,  $J = 7.9$  Hz, 1 H), 7.30 (d,  $J = 6.5$  Hz, 2 H), 7.21–7.16 (m, 1 H), 4.50 (qdd,  $J = 9.2, 7.9, 5.0$  Hz, 1 H), 3.99 (s, 3 H), 3.61 (dd,  $J = 17.8, 5.0$  Hz, 1 H), 3.55 (dd,  $J = 17.8, 7.9$  Hz, 1 H), 2.36 (s, 3 H);  **$^{13}C$  NMR** (126 MHz,  $CDCl_3$ )  $\delta$  193.59, 169.30, 137.79, 136.38, 136.17, 135.34, 132.09, 131.20, 130.42, 130.29, 129.82, 126.62, 126.61 (q,  $J = 278.21$  Hz), 124.75, 123.08, 77.28, 77.02, 76.77, 52.30, 40.98 (q,  $J = 27.9$  Hz), 39.29, 20.29; **HRMS** [ESI] Calcd for  $[M+H]^+$   $C_{19}H_{17}BrF_3O_3$ : 429.0308, Found: 429.0311.

**Methyl-2-methyl-6-(1,1,1-trifluoro-4-(furan-2-yl)-4-oxobutan-2-yl)benzoate (3ah).**

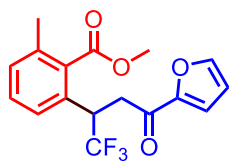

According to the general procedure, the product was isolated with 88%, 30.0 mg.

**<sup>1</sup>H NMR** (400 MHz, CDCl<sub>3</sub>) δ 7.57 (dd, *J* = 1.7, 0.8 Hz, 1 H), 7.34–7.27 (m, 2 H), 7.19 (dd, *J* = 3.7, 0.8 Hz, 1 H), 7.16 (dd, *J* = 2.3, 1.7 Hz, 1 H), 6.52 (dd, *J* = 3.6, 1.7 Hz, 1 H), 4.53–4.35 (m, 1 H), 3.98 (s, 3 H), 3.52 (dd, *J* = 17.4, 5.3 Hz, 1 H), 3.44 (dd, *J* = 17.3, 8.1 Hz, 1 H), 2.34 (s, 3 H); **<sup>13</sup>C NMR** (100 MHz, CDCl<sub>3</sub>) δ 184.15, 169.27, 152.16, 146.56, 136.02, 135.35, 131.98, 130.35, 129.74, 126.58 (q, *J* = 278.25 Hz), 117.46, 112.51, 52.29, 40.76 (q, *J* = 27.9 Hz), 38.90, 20.22; **HRMS** [ESI] Calcd for [M+H]<sup>+</sup> C<sub>17</sub>H<sub>16</sub>F<sub>3</sub>O<sub>4</sub>: 341.0995, Found: 341.1003.

**Methyl-2-methyl-6-(1,1,1-trifluoro-4-oxo-4-(thiophen-2-yl)butan-2-yl)benzoate (3ai).**

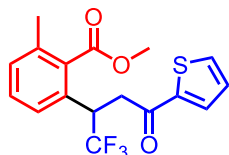

According to the general procedure, the product was isolated with 81%, 28.8 mg.

**<sup>1</sup>H NMR** (400 MHz, CDCl<sub>3</sub>) δ 7.73 (dd, *J* = 3.8, 1.2 Hz, 1 H), 7.64 (dd, *J* = 4.9, 1.1 Hz, 1 H), 7.33–7.29 (m, 2 H), 7.19–7.16 (m, 1 H), 7.12 (dd, *J* = 4.9, 3.8 Hz, 1 H), 4.46 (tdd, *J* = 9.2, 8.1, 5.0 Hz, 1 H), 3.97 (s, 3 H), 3.59 (dd, *J* = 17.2, 5.1 Hz, 1 H), 3.49 (dd, *J* = 17.1, 8.0 Hz, 1 H), 2.34 (s, 3 H); **<sup>13</sup>C NMR** (126 MHz, CDCl<sub>3</sub>) δ 187.70, 169.28, 143.21, 136.09, 135.33, 134.25, 132.19, 131.97 (q, *J* = 1.6 Hz), 130.39, 129.78, 128.17, 126.58 (q, *J* = 278.45 Hz), 124.82, 52.29, 41.23 (q, *J* = 28.0 Hz), 39.68 (q, *J* = 1.9 Hz), 20.24; **<sup>19</sup>F NMR** (471 MHz, CDCl<sub>3</sub>) δ -68.91; **HRMS** [ESI] Calcd for [M+H]<sup>+</sup> C<sub>17</sub>H<sub>16</sub>F<sub>3</sub>O<sub>3</sub>S: 357.0767, Found: 357.0771.

**Methyl-2-(4-(cyclohex-1-en-1-yl)-1,1,1-trifluoro-4-oxobutan-2-yl)-6-methylbenzoate (3aj).**

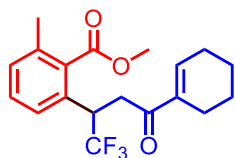

According to the general procedure, the product was isolated with 34%, 12.0 mg.

**<sup>1</sup>H NMR** (500 MHz, CDCl<sub>3</sub>) δ 7.33 (t, *J* = 7.7 Hz, 1 H), 7.27 (d, *J* = 8.1 Hz, 1 H), 7.19 (dt, *J* = 7.5, 1.0 Hz, 1 H), 6.92 (tt, *J* = 4.0, 1.7 Hz, 1 H), 4.39 (qdd, *J* = 9.4, 7.9, 5.1 Hz, 1 H), 4.02 (s, 3 H), 3.33 (dd, *J* = 17.2, 5.1 Hz, 1 H), 3.25 (dd, *J* = 17.2, 7.9 Hz, 1 H), 2.37 (s, 3 H), 2.29–2.23 (m, 2 H), 2.20 (dddd, *J* = 6.6, 4.9, 3.5, 1.9 Hz, 2 H), 1.66–1.56 (m, 4 H); **<sup>13</sup>C NMR** (126 MHz, CDCl<sub>3</sub>) δ 195.64, 169.33, 140.50, 139.01, 135.90, 135.35, 132.55, 130.13, 129.63, 126.78 (q, *J* = 278.31 Hz), 124.88, 123.45, 52.26, 41.20 (d, *J* = 27.8 Hz), 37.57, 26.08, 23.13, 21.78, 21.43, 20.22; **HRMS** [ESI] Calcd for [M+H]<sup>+</sup> C<sub>19</sub>H<sub>22</sub>F<sub>3</sub>O<sub>3</sub>: 355.1516, Found: 355.1523.

**Methyl-2-(4-(3-((tert-butoxycarbonyl)amino)phenyl)-1,1,1-trifluoro-4-oxobutan-2-yl)-6-methylbenzoate (3ak).**

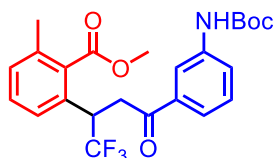

According to the general procedure, the product was isolated with 80%, 37.3 mg.

**<sup>1</sup>H NMR** (500 MHz, CDCl<sub>3</sub>) δ 7.86 (t, *J* = 2.0 Hz, 1 H), 7.69–7.61 (m, 1 H), 7.57 (ddd, *J* = 7.8, 1.7, 1.0 Hz, 1 H), 7.35 (t, *J* = 8.0 Hz, 1 H), 7.31–7.27 (m, 2 H), 7.20–7.12 (m, 1 H), 6.71 (s, 1 H), 4.58–4.42 (m, 1 H), 3.97 (s, 3 H), 3.63 (dd, *J* = 17.8, 5.0 Hz, 1 H), 3.56 (dd, *J* = 17.7, 7.8 Hz, 1 H), 2.34 (s, 3 H), 1.52 (s, 9 H); **<sup>13</sup>C NMR** (126 MHz, CDCl<sub>3</sub>) δ 194.59, 169.38, 152.64, 139.05, 136.82, 136.02, 135.33, 132.31, 130.29, 129.78, 129.35, 126.72 (q, *J* = 278.38 Hz), 124.89, 123.40, 122.59, 117.85, 81.01, 52.26, 41.07 (q, *J* = 27.8 Hz), 39.23, 28.29, 20.26; **HRMS** [ESI] Calcd for [M+H]<sup>+</sup> C<sub>24</sub>H<sub>27</sub>F<sub>3</sub>NO<sub>5</sub>:466.1836, Found: 466.1840.

**Methyl-2-(4-(3'-((tert-butoxycarbonyl)amino)-[1,1'-biphenyl]-4-yl)-1,1,1-trifluoro-4-oxobutan-2-yl)-6-methylbenzoate (3al).**

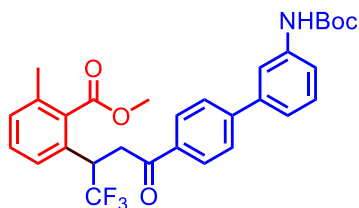

According to the general procedure, the product was isolated with 82%, 44.4 mg.

**<sup>1</sup>H NMR** (500 MHz, CDCl<sub>3</sub>) δ 8.03–7.96 (m, 2 H), 7.74–7.71 (m, 1 H), 7.69–7.61 (m, 2 H), 7.37 (t, *J* = 7.8 Hz, 1 H), 7.34–7.30 (m, 3 H), 7.28 (t, *J* = 1.5 Hz, 1 H), 7.20–7.16 (m, 1 H), 6.60 (s, 1 H), 4.61–4.48 (m, 1 H), 3.99 (s, 3 H), 3.67 (dd, *J* = 17.7, 5.0 Hz, 1 H), 3.61 (dd, *J* = 17.6, 8.0 Hz, 1 H), 2.36 (s, 3 H), 1.53 (s, 9 H); **<sup>13</sup>C NMR** (126 MHz, CDCl<sub>3</sub>) δ 94.41, 169.34, 152.70, 145.89, 140.61, 139.05, 136.07, 135.39, 134.94, 132.31, 130.32, 129.77, 129.55, 128.67, 127.38, 126.75 (q, *J* = 278.29 Hz), 124.83, 121.93, 118.34, 117.28, 80.78, 52.28, 41.14 (q, *J* = 27.7 Hz), 39.12; **HRMS** [ESI] Calcd for [M+H]<sup>+</sup> C<sub>30</sub>H<sub>31</sub>F<sub>3</sub>NO<sub>5</sub>: 542.2149, Found: 542.2160.

**Methyl-2-(4-(3-((tert-butoxycarbonyl)amino)phenyl)-1,1,1-trifluoro-4-oxobutan-2-yl)-6-methoxybenzoate (3ck).**

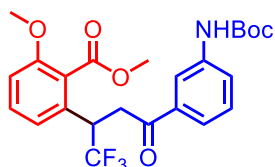

According to the general procedure, the product was isolated with 77%, 37.0 mg.

**<sup>1</sup>H NMR** (500 MHz, CDCl<sub>3</sub>) δ 7.87 (t, *J* = 2.0 Hz, 1 H), 7.72–7.68 (m, 1 H), 7.61 (dt, *J* = 7.8, 1.3 Hz, 1 H), 7.38 (q, *J* = 7.9 Hz, 2 H), 7.08 (d, *J* = 8.0 Hz, 1 H), 6.91 (dd, *J* =

8.4, 0.8 Hz, 1 H), 6.69 (s, 1 H), 4.48–4.38 (m, 1 H), 3.99 (s, 3 H), 3.84 (s, 3 H), 3.64 (dd,  $J = 17.6, 5.2$  Hz, 1 H), 3.57 (dd,  $J = 17.6, 7.7$  Hz, 1 H), 1.55 (s, 9 H);  $^{13}\text{C}$  NMR (126 MHz,  $\text{CDCl}_3$ )  $\delta$  194.42, 167.71, 156.75, 152.61, 139.03, 136.81, 133.57, 130.93, 129.38, 126.57 (q,  $J = 278.06$  Hz), 125.39, 123.38, 122.61, 119.50, 117.85, 111.03, 81.01, 55.97, 52.54, 41.19 (q,  $J = 28.2$  Hz), 39.06, 28.30; **HRMS** [ESI] Calcd for  $[\text{M}+\text{H}]^+$   $\text{C}_{24}\text{H}_{27}\text{F}_3\text{NO}_6$ : 482.1785, Found: 482.1796.

**Methyl-2-(4-(3-((tert-butoxycarbonyl)amino)phenyl)-1,1,1-trifluoro-4-oxobutan-2-yl)-1-naphthoate (3ek).**

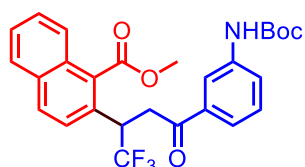

According to the general procedure, the product was isolated with 80%, 40.1 mg.

$^1\text{H}$  NMR (500 MHz,  $\text{CDCl}_3$ )  $\delta$  7.90 (d,  $J = 8.7$  Hz, 1H), 7.88–7.84 (m, 2 H), 7.83–7.79 (m, 1 H), 7.64 (d,  $J = 8.1$  Hz, 1 H), 7.59–7.55 (m, 2 H), 7.54–7.48 (m, 2 H), 7.34 (t,  $J = 7.9$  Hz, 1 H), 6.64 (s, 1 H), 4.78–4.69 (m, 1 H), 4.10 (s, 3 H), 3.72 (dd,  $J = 17.7, 5.0$  Hz, 1 H), 3.63 (dd,  $J = 17.6, 7.8$  Hz, 1 H), 1.51 (s, 9 H);  $^{13}\text{C}$  NMR (126 MHz,  $\text{CDCl}_3$ )  $\delta$  194.44, 169.02, 152.59, 139.05, 136.79, 133.05, 132.74, 130.66, 129.96, 129.39, 128.01, 127.51, 127.03 (q,  $J = 278.60$  Hz), 126.92, 125.64, 123.91, 123.41, 122.60, 117.81, 81.03, 52.65, 41.60 (q,  $J = 28.0$  Hz), 38.94, 28.30; **HRMS** [ESI] Calcd for  $[\text{M}+\text{H}]^+$   $\text{C}_{27}\text{H}_{27}\text{F}_3\text{NO}_5$ : 502.1836, Found: 502.1838.

**Methyl-2-(4-(3-((tert-butoxycarbonyl)amino)phenyl)-1,1,1-trifluoro-4-oxobutan-2-yl)-6-(phenylamino)benzoate (3fk).**

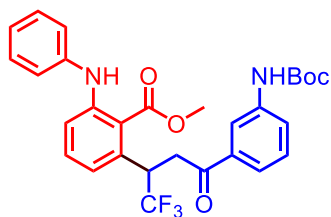

According to the general procedure, the product was isolated with 86%, 46.6 mg.

**<sup>1</sup>H NMR** (500 MHz, CDCl<sub>3</sub>) δ 7.88 (t, *J* = 2.0 Hz, 1 H), 7.66 (s, 1 H), 7.64 (d, *J* = 8.6 Hz, 1 H), 7.59 (dt, *J* = 8.0, 1.2 Hz, 1 H), 7.37 (t, *J* = 7.9 Hz, 1 H), 7.31–7.26 (m, 2 H), 7.25–7.23 (m, 1 H), 7.23–7.19 (m, 1 H), 7.13–7.08 (m, 2 H), 7.00 (tt, *J* = 7.4, 1.2 Hz, 1 H), 6.94 (d, *J* = 7.3 Hz, 1 H), 6.59 (s, 1 H), 4.99 (dq, *J* = 12.9, 9.4, 6.4 Hz, 1 H), 4.00 (s, 3 H), 3.65–3.61 (m, 1 H), 3.60–3.56 (m, 1 H), 1.53 (s, 9 H); **<sup>13</sup>C NMR** (126 MHz, CDCl<sub>3</sub>) δ 194.95, 168.73, 152.57, 144.48, 141.53, 139.02, 136.93, 135.58, 131.47, 129.39, 126.97 (q, *J* = 278.33 Hz), 123.39, 122.62, 122.55, 120.54, 118.82, 117.80, 115.94, 81.07, 52.45, 40.67 (q, *J* = 27.5 Hz), 39.55, 28.31; **HRMS** [ESI] Calcd for [M+H]<sup>+</sup> C<sub>29</sub>H<sub>30</sub>F<sub>3</sub>N<sub>2</sub>O<sub>5</sub>: 543.2101, Found: 543.2102.

**Methyl-5-(4-(3-((tert-butoxycarbonyl)amino)phenyl)-1,1,1-trifluoro-4-oxobutan-2-yl)-3,4-dihydro-2H-pyran-6-carboxylate (3ok).**

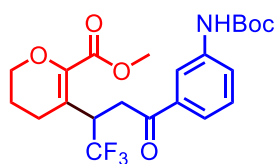

According to the general procedure, the product was isolated with 46%, 21.0 mg.

**<sup>1</sup>H NMR** (500 MHz, CDCl<sub>3</sub>) δ 7.88 (t, *J* = 2.0 Hz, 1 H), 7.73 (d, *J* = 8.0 Hz, 1 H), 7.63 (dt, *J* = 7.8, 1.2 Hz, 1 H), 7.43 (t, *J* = 7.9 Hz, 1 H), 6.63 (s, 1 H), 5.34–5.22 (m, 1 H), 4.13–4.08 (m, 1 H), 4.05–3.99 (m, 1 H), 3.81 (s, 3 H), 3.3–3.32 (m, 2 H), 2.26 (dt, *J* = 18.2, 6.4 Hz, 1 H), 2.16 (dt, *J* = 18.0, 6.5 Hz, 1 H), 1.92 (ddq, *J* = 13.5, 6.5, 3.4 Hz, 1 H), 1.85 (dq, *J* = 13.5, 6.7, 3.4 Hz, 1 H), 1.56 (s, 9 H); **<sup>13</sup>C NMR** (126 MHz, CDCl<sub>3</sub>) δ 195.38, 163.38, 152.55, 150.79, 139.07, 136.95, 129.48, 126.63 (q, *J* =

278.46 Hz), 123.36, 122.60, 117.75, 114.37, 81.04, 66.00, 52.30, 39.34 (q,  $J = 28.6$  Hz), 35.17, 28.31, 21.45, 21.31; **HRMS** [ESI] Calcd for  $[M+H]^+$   $C_{22}H_{27}F_3NO_6$ : 458.1785, Found: 458.1782.

**1<sup>3</sup>-methyl-2-(trifluoromethyl)-6,13-diaza-1(1,2),5(1,3)-dibenzenacyclotetradecaphane-4,7,14-trione (5a).**

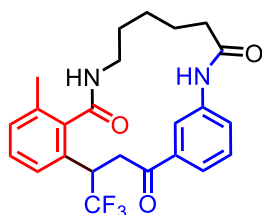

According to the general procedure, the product was obtained with 22.0 mg.

**<sup>1</sup>H NMR** (500 MHz, DMSO)  $\delta$  10.07 (s, 1 H), 8.39 (s, 1 H), 8.27 (s, 1 H), 7.49 (d,  $J = 5.5$  Hz, 1 H), 7.45 (d,  $J = 4.9$  Hz, 2 H), 7.41 (d,  $J = 8.0$  Hz, 1 H), 7.36 (t,  $J = 7.7$  Hz, 1 H), 7.24 (d,  $J = 7.4$  Hz, 1 H), 4.13–4.01 (m, 1 H), 3.52–3.36 (m, 2 H), 3.27–3.15 (m, 1 H), 2.87 (s, 1 H), 2.35 (s, 1 H), 2.32–2.25 (m, 1 H), 2.17 (s, 3 H), 1.77 (s, 2 H), 1.65 (s, 1 H), 1.45 (s, 3 H); **<sup>13</sup>C NMR** (126 MHz, DMSO)  $\delta$  196.41, 172.43, 167.48, 139.68, 139.29, 135.59, 134.34, 130.03, 129.52, 129.35, 128.48, 126.17 (q,  $J = 280.02$  Hz), 124.93, 124.74, 122.50, 120.72, 44.02 (q,  $J = 28.0$  Hz), 40.72, 36.85, 28.04, 25.96, 24.49, 19.06; **<sup>19</sup>F NMR** (471 MHz, DMSO)  $\delta$  -66.88; **HRMS** [ESI] Calcd for  $[M+H]^+$   $C_{24}H_{25}F_3N_2O_3$ : 447.1890, Found: 447.1900.

**1<sup>3</sup>-methoxy-2-(trifluoromethyl)-6,13-diaza-1(1,2),5(1,3)-dibenzenacyclotetradecaphane-4,7,14-trione (5b).**

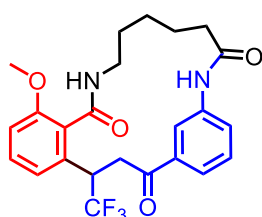



According to the general procedure, the product was obtained with 21.9 mg.

**<sup>1</sup>H NMR** (500 MHz, DMSO)  $\delta$  10.06 (s, 1 H), 8.35 (s, 1 H), 8.13 (t,  $J = 5.3$  Hz, 1 H), 7.53–7.37 (m, 4 H), 7.14 (d,  $J = 7.9$  Hz, 1 H), 7.06 (d,  $J = 8.3$  Hz, 1 H), 4.10 (q,  $J = 8.2$  Hz, 1 H), 3.73 (s, 3 H), 3.52–3.37 (m, 2 H), 3.20–3.09 (m, 1 H), 2.88 (td,  $J = 11.1, 10.4, 5.0$  Hz, 1H), 2.41–2.24 (m, 2 H), 1.76 (s, 2 H), 1.62 (s, 1 H), 1.43 (s, 3 H).; **<sup>13</sup>C NMR** (126 MHz, DMSO)  $\delta$  196.29, 172.32, 165.09, 155.71, 139.17, 135.53, 131.18, 129.71, 129.41, 129.24, 128.79, 126.05 (q,  $J = 280.56$  Hz), 124.68, 122.70, 122.43, 120.69, 119.41, 111.41, 55.59, 43.53 (q,  $J = 28.0$  Hz), 40.55, 36.75, 28.08, 27.97, 25.98, 24.43.; **<sup>19</sup>F NMR** (471 MHz, DMSO)  $\delta$  -66.70; **HRMS** [ESI] Calcd for  $[M+H]^+$  C<sub>24</sub>H<sub>26</sub>F<sub>3</sub>N<sub>2</sub>O<sub>4</sub>: 463.1839, Found: 463.1838.

**1<sup>3</sup>-(phenylamino)-2-(trifluoromethyl)-6,13-diaza-1(1,2),5(1,3)-dibenzenacyclotetradecephane-4,7,14-trione (5c).**

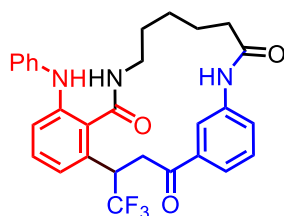

According to the general procedure, the product was obtained with 17.0 mg.

**<sup>1</sup>H NMR** (500 MHz, DMSO)  $\delta$  10.07 (s, 1 H), 8.35 (s, 1 H), 8.20 (t,  $J = 5.3$  Hz, 1 H), 7.52 (s, 1 H), 7.47 (d,  $J = 5.9$  Hz, 2 H), 7.33 (t,  $J = 8.0$  Hz, 1 H), 7.23–7.17 (m, 3 H), 7.14 (d,  $J = 7.8$  Hz, 1 H), 7.03 (s, 1 H), 7.00–6.97 (m, 2 H), 6.84 (tt,  $J = 7.2, 1.1$  Hz, 1 H), 4.14 (dt,  $J = 15.5, 7.8$  Hz, 1 H), 3.56–3.42 (m, 2 H), 3.17 (d,  $J = 5.2$  Hz, 1 H), 2.87 (ddd,  $J = 14.3, 9.9, 5.0$  Hz, 1 H), 2.41–2.32 (m, 1 H), 2.31–2.21 (m, 1 H), 1.75 (s, 2 H), 1.57 (s, 1 H), 1.41 (d,  $J = 9.0$  Hz, 3 H); **<sup>13</sup>C NMR** (126 MHz, DMSO)  $\delta$  197.15, 172.93, 166.62, 143.92, 141.12, 139.75, 136.25, 131.86, 131.39, 129.92, 129.81, 129.47, 126.05 (q,  $J = 280.56$  Hz), 125.30, 123.20, 121.20, 120.85, 120.71, 118.95, 118.49, 49.07, 44.19 (q,  $J = 28.03$  Hz), 41.25, 37.28, 28.27, 26.44, 24.87; **<sup>19</sup>F**

**NMR** (471 MHz, DMSO)  $\delta$  -66.52; **HRMS** [ESI] Calcd for  $[M+H]^+$   $C_{29}H_{28}F_3N_3O_3$ : 524.2156, Found: 524.2152.

**2-(trifluoromethyl)-6,13-diaza-1(2,1)-naphthalena-5(1,3)-benzenacyclotetradecapane-4,7,14-trione (5d).**

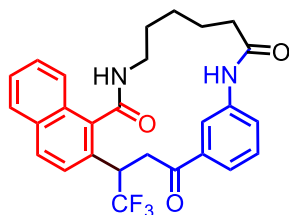

According to the general procedure, the product was obtained with 26.2 mg.

**$^1H$  NMR** (500 MHz, DMSO)  $\delta$  10.09 (s, 1 H), 8.82 (s, 1 H), 8.54 (s, 0.5 H), 8.01 (s, 2.5 H), 7.89–7.42 (m, 7 H), 4.27 (m, 1 H), 3.76 (m, 1 H), 3.44 (m, 1 H), 2.72 (s, 0.5 H), 2.42–2.04 (m, 2.5 H), 1.79 (m, 3 H), 1.48 (m, 2 H), 1.43–1.14 (m, 1 H);  **$^{13}C$  NMR** (126 MHz, DMSO)  $\delta$  205.47, 172.99, 167.34, 132.94, 129.59, 128.34, 127.42, 126.01, 125.57, 124.76, 122.48, 41.06, 37.61, 30.04, 26.72, 25.44;  **$^{19}F$  NMR** (471 MHz, DMSO)  $\delta$  -65.44, -67.45; **HRMS** [ESI] Calcd for  $[M+H]^+$   $C_{27}H_{25}F_3N_2O_3$ : 483.1890, Found: 483.1884.

**2-(trifluoromethyl)-13,14-dihydro-12H-6,13-diaza-1(5,6)-pyrana-5(1,3)-benzenacyclotetradecaphane-4,7,14-trione (5e).**

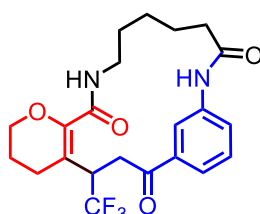

According to the general procedure, the product was obtained with 26.3 mg.

**$^1H$  NMR** (500 MHz, DMSO)  $\delta$  9.99 (s, 1 H), 8.08 (dd,  $J$  = 8.8, 4.1 Hz, 1 H), 7.92 (s,

1 H), 7.72 (d,  $J = 7.9$  Hz, 1 H), 7.51 (d,  $J = 7.8$  Hz, 1 H), 7.44 (t,  $J = 7.8$  Hz, 1 H), 6.13–5.96 (m, 1 H), 4.00 (dp,  $J = 8.2, 4.8$  Hz, 2 H), 3.43–3.35 (m, 1 H), 3.25 (dd,  $J = 13.5, 4.5$  Hz, 1 H), 3.04–2.96 (m, 1 H), 2.70 (dq,  $J = 14.1, 4.8$  Hz, 1 H), 2.32 (ddd,  $J = 18.3, 9.4, 4.6$  Hz, 2 H), 2.20 (ddd,  $J = 13.2, 8.9, 4.6$  Hz, 1 H), 2.06 (dt,  $J = 18.0, 6.4$  Hz, 1 H), 1.86–1.76 (m, 2 H), 1.65 (t,  $J = 7.4$  Hz, 1 H), 1.57 (dq,  $J = 13.3, 6.1, 5.5$  Hz, 1 H), 1.40 (dh,  $J = 13.2, 7.4$  Hz, 2 H), 1.31 (q,  $J = 7.4$  Hz, 2 H);  $^{13}\text{C}$  NMR (126 MHz, DMSO)  $\delta$  198.86, 171.98, 162.61, 143.86, 139.54, 136.18, 129.56, 127.45 (q,  $J = 280.63$  Hz), 124.57, 122.51, 121.72, 112.84, 66.00, 39.00, 38.33, 36.74, 29.77, 25.75, 25.35, 21.50, 21.13 ;  $^{19}\text{F}$  NMR (471 MHz, DMSO)  $\delta$  -65.13; HRMS [ESI] Calcd for  $[\text{M}+\text{H}]^+$   $\text{C}_{22}\text{H}_{25}\text{F}_3\text{N}_2\text{O}_4$ : 439.1839, Found:439.1840.

**(Z)-11-phenyl-13-(trifluoromethyl)-2,9-diaza-1(1,3)-benzenacyclopentadecaphan-11-ene-3,10,15-trione (5f).**

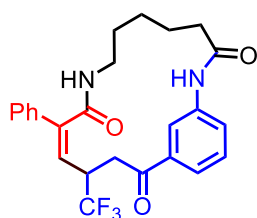

According to the general procedure, the product was obtained with 19.0 mg.

$^1\text{H}$  NMR (500 MHz, DMSO)  $\delta$  10.09 (s, 1 H), 8.13 (s, 1 H), 8.07 (t,  $J = 5.4$  Hz, 1 H), 7.55–7.46 (m, 3 H), 7.43–7.31 (m, 5 H), 5.89 (d,  $J = 10.1$  Hz, 1 H), 4.06–3.93 (m, 1 H), 3.44 (dd,  $J = 13.8, 6.2$  Hz, 1 H), 3.16 (dq,  $J = 13.4, 6.3, 5.6$  Hz, 1 H), 3.12–3.01 (m, 2 H), 2.42–2.33 (m, 1 H), 2.29 (q,  $J = 8.6, 8.1$  Hz, 1 H), 1.75 (s, 2 H), 1.58 (s, 2 H), 1.48–1.38 (m, 2 H);  $^{13}\text{C}$  NMR (126 MHz, DMSO)  $\delta$  197.41, 172.30, 166.34, 143.21, 138.90, 136.35, 129.44, 128.62, 128.52, 126.72, 126.19 (q,  $J = 279.14$  Hz), 125.94, 122.99, 122.47, 121.75, 42.30 (q,  $J = 30.02$  Hz), 36.56, 28.22, 26.09, 24.32;  $^{19}\text{F}$  NMR (471 MHz, DMSO)  $\delta$  -67.76; HRMS [ESI] Calcd for  $[\text{M}+\text{H}]^+$   $\text{C}_{25}\text{H}_{25}\text{F}_3\text{N}_2\text{O}_3$ : 459.1890, Found: 459.1886.

**1<sup>3</sup>-methyl-2-(trifluoromethyl)-6,14-diaza-1(1,2),5(1,3)-dibenzencyclopentadecapane-4,7,15-trione (5g).**

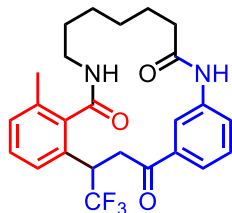

According to the general procedure, the product was obtained with 39.2 mg.

**<sup>1</sup>H NMR** (500 MHz, DMSO)  $\delta$  9.85 (s, 1 H), 8.54 (s, 1 H), 8.21 (s, 1 H), 7.97 (s, 1 H), 7.49 (d,  $J = 6.3$  Hz, 2 H), 7.43–7.36 (m, 2 H), 7.32–7.26 (m, 1 H), 3.98 (s, 1 H), 3.47 (dd,  $J = 13.8, 5.0$  Hz, 1 H), 3.42–3.34 (m, 1 H), 3.00 (d,  $J = 52.4$  Hz, 2 H), 2.53 (d,  $J = 12.8$  Hz, 1 H), 2.28 (s, 3 H), 2.21 (ddd,  $J = 13.1, 9.1, 3.7$  Hz, 1 H), 1.88 (s, 1 H), 1.66 (s, 2 H), 1.49–1.30 (m, 5 H).; **<sup>13</sup>C NMR** (126 MHz, DMSO)  $\delta$  197.48, 172.25, 168.31, 139.77, 139.60, 135.80, 134.77, 131.19, 130.62, 130.00, 129.31, 126.80 (q,  $J = 279.63$  Hz), 125.40, 124.41, 122.65, 120.91, 44.20 (q,  $J = 27.0$  Hz), 41.51, 37.52, 27.82, 25.66, 24.44, 24.36, 19.61; **<sup>19</sup>F NMR** (471 MHz, DMSO)  $\delta$  -66.40; **HRMS** [ESI] Calcd for  $[M+H]^+$  C<sub>25</sub>H<sub>27</sub>F<sub>3</sub>N<sub>2</sub>O<sub>3</sub>: 461.2047, Found: 461.2056.

**1<sup>3</sup>-methyl-2-(trifluoromethyl)-6,9,12-triaza-1(1,2),5(1,3)-dibenzencyclotridecapane-4,7,10,13-tetraone (5h).**

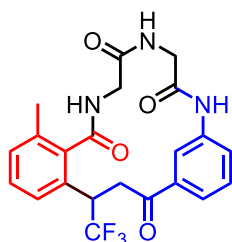

According to the general procedure, the product was obtained with 28.0 mg.

**<sup>1</sup>H NMR** (500 MHz, DMSO)  $\delta$  9.34 (s, 1 H), 9.28 (s, 1 H), 8.62 (s, 1 H), 8.32 (d,  $J = 7.5$  Hz, 1 H), 8.04 (s, 1 H), 7.60 (d,  $J = 7.6$  Hz, 1 H), 7.54 (d,  $J = 7.8$  Hz, 2 H), 7.46 (d,

$J = 9.3$  Hz, 2 H), 7.35 (d,  $J = 7.0$  Hz, 1 H), 4.23 (s, 1 H), 4.10 (d,  $J = 14.7$  Hz, 1 H), 3.89–3.74 (m, 2 H), 3.73–3.61 (m, 2 H), 2.88 (t,  $J = 13.5$  Hz, 1 H), 2.36 (s, 3 H);  **$^{13}\text{C}$  NMR** (126 MHz, DMSO)  $\delta$  196.04, 171.09, 170.64, 169.12, 139.17, 136.74, 136.53, 135.14, 133.16, 131.22, 130.51, 130.19, 127.07 (q,  $J = 279.53$  Hz), 125.03, 124.00, 122.35, 121.82, 46.21 (q,  $J = 27.2$  Hz), 45.18, 45.04, 44.32, 20.86;  **$^{19}\text{F}$  NMR** (471 MHz, DMSO)  $\delta$  -64.28; **HRMS** [ESI] Calcd for  $[\text{M}+\text{H}]^+$   $\text{C}_{22}\text{H}_{20}\text{F}_3\text{N}_3\text{O}_4$ : 448.1479, Found: 448.1491.

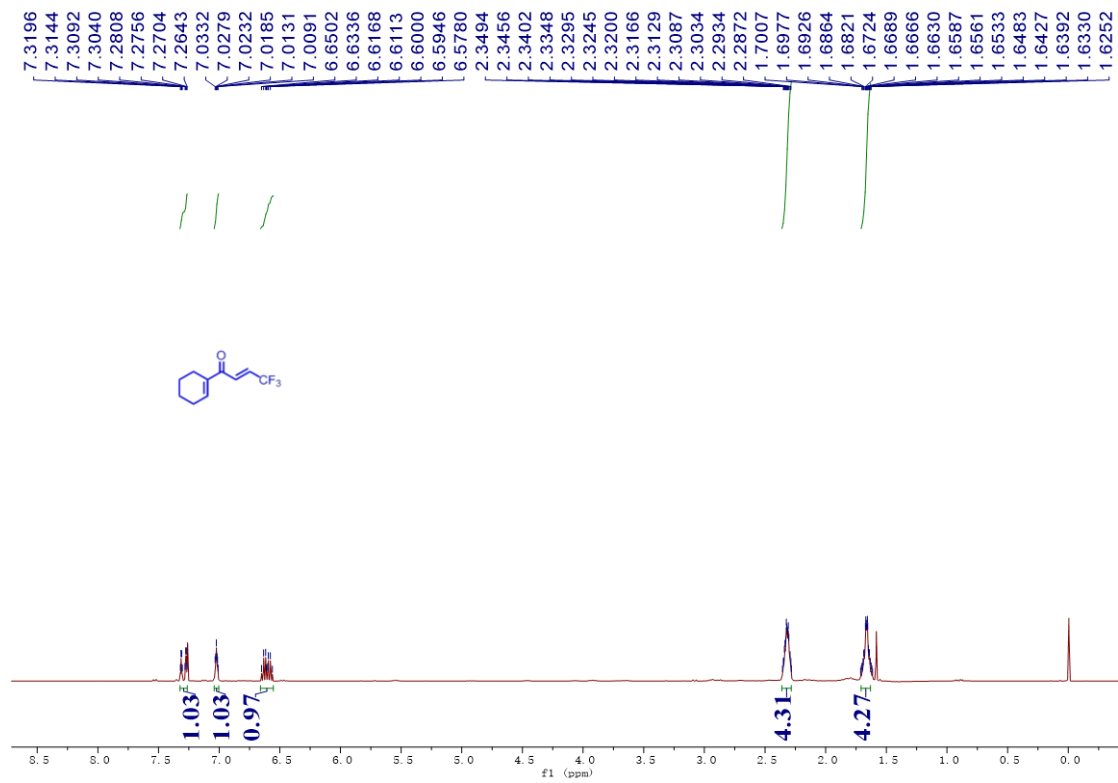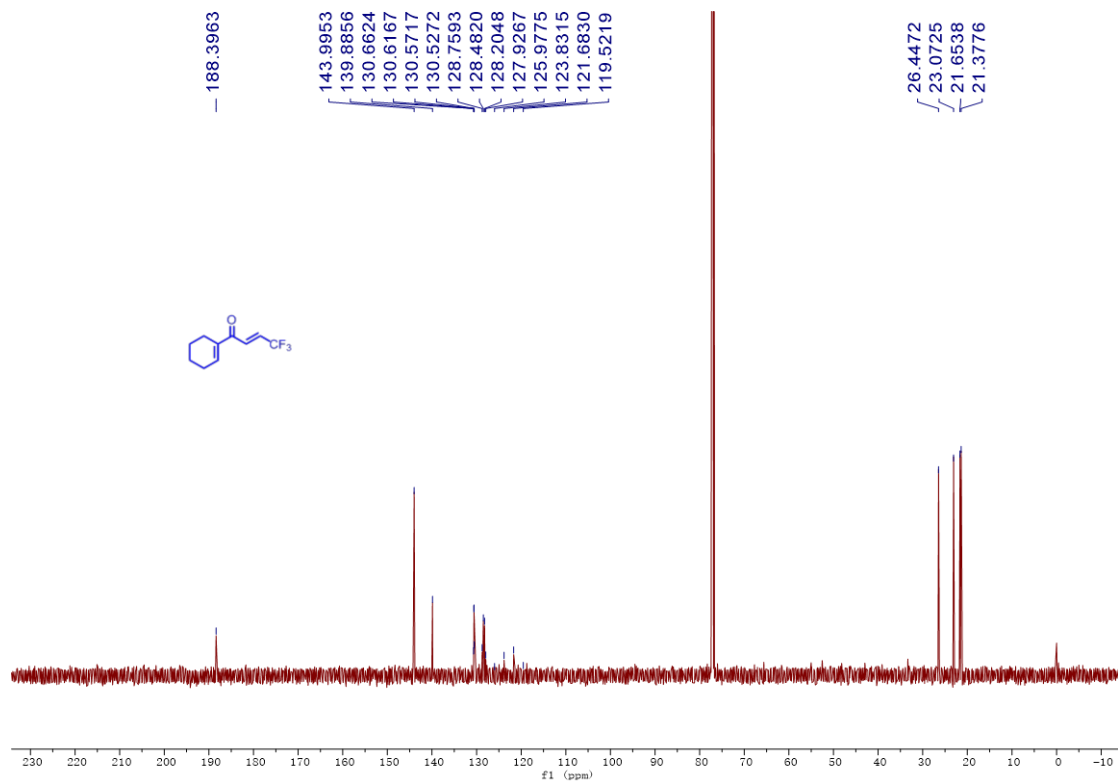

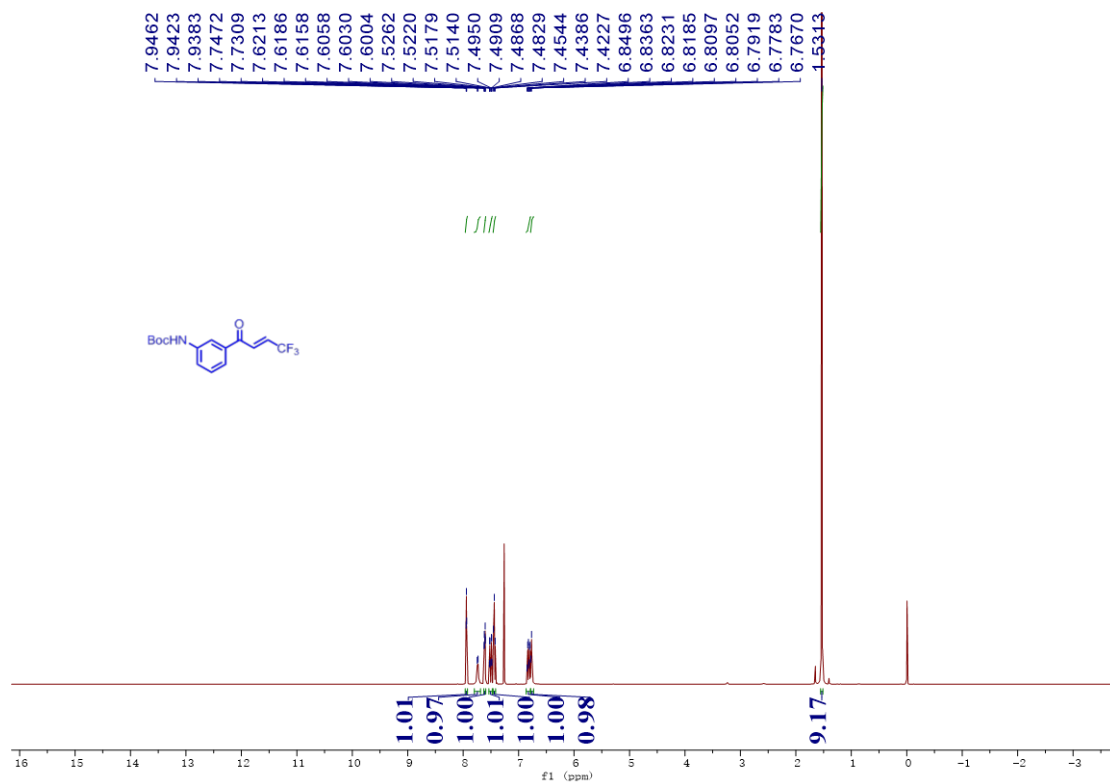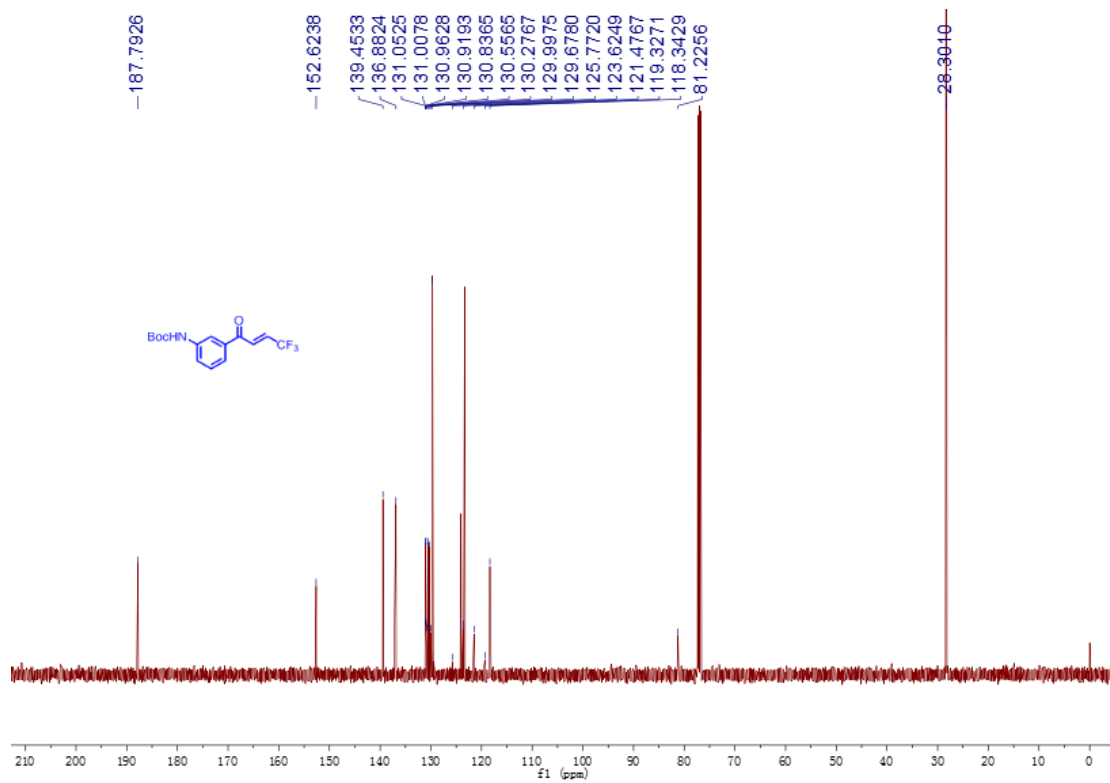

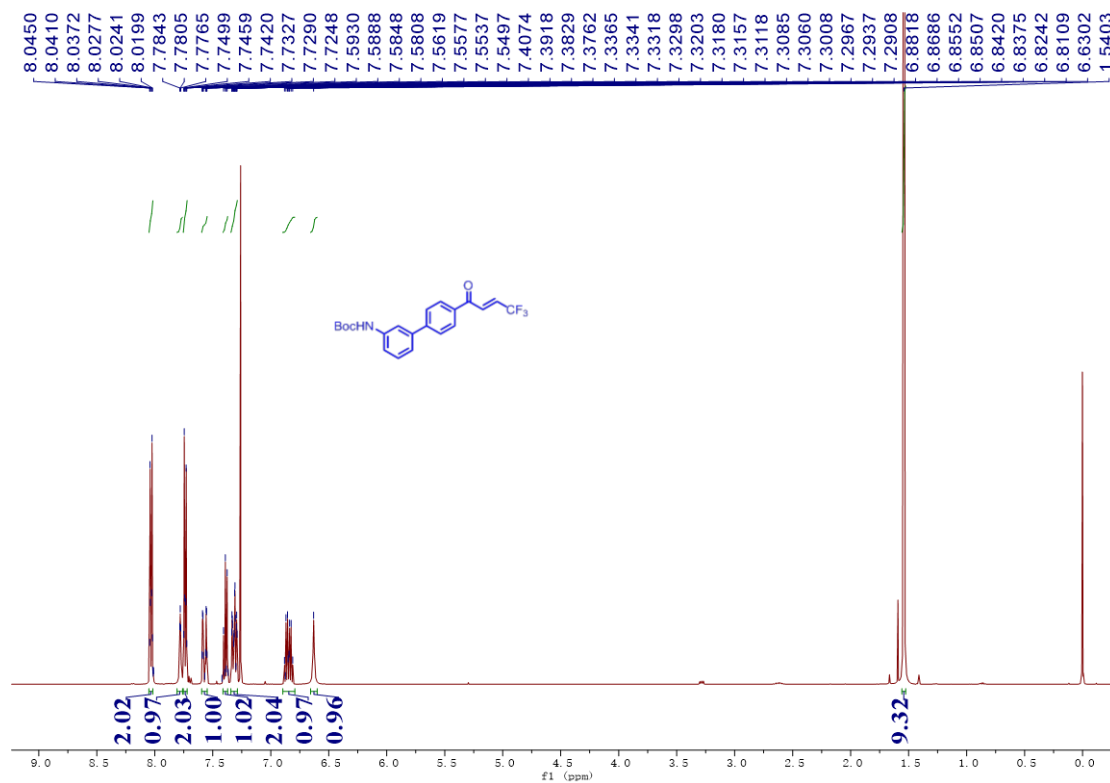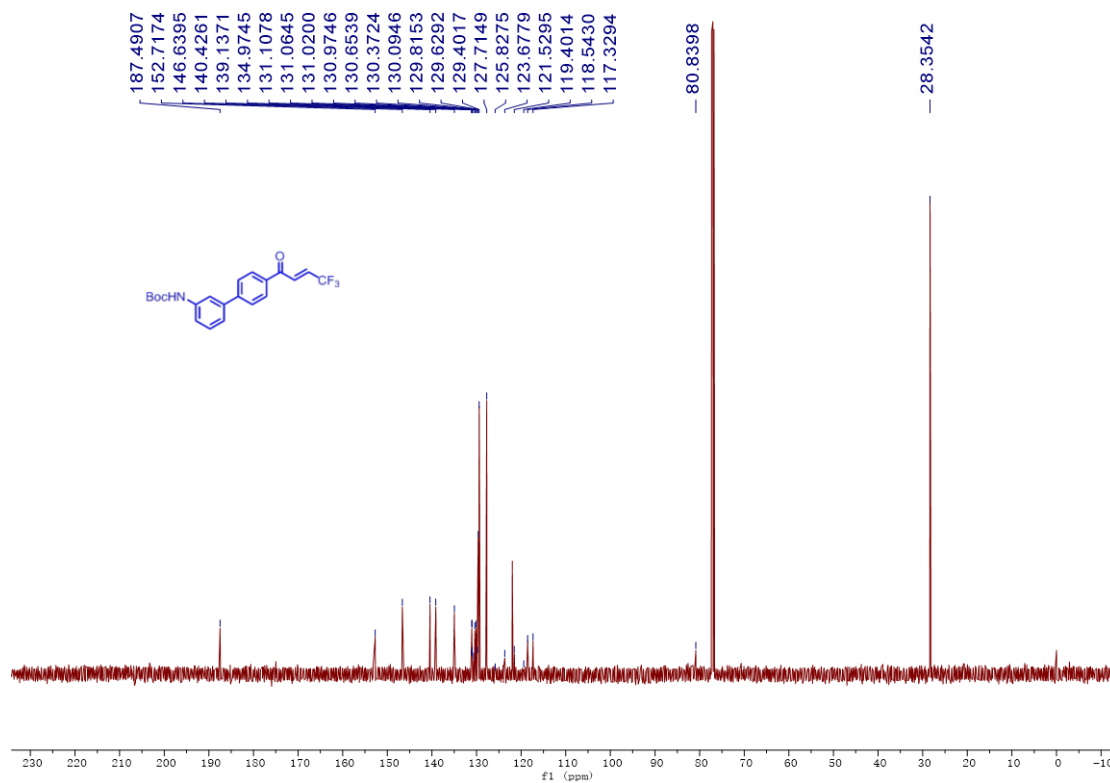



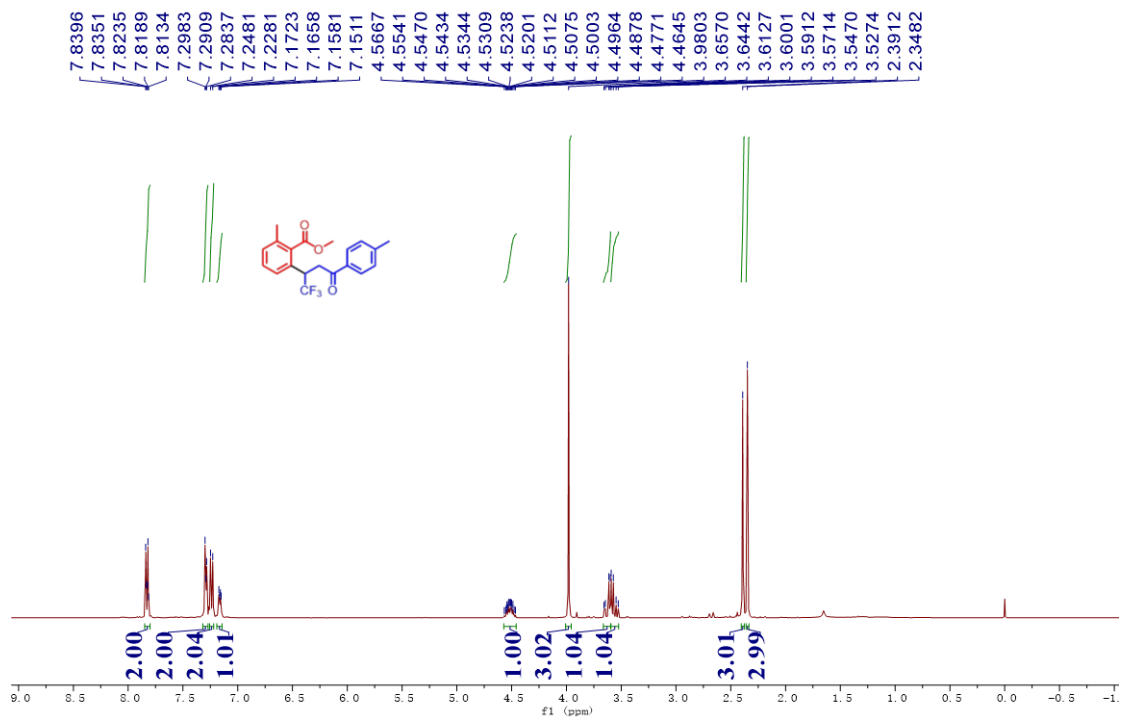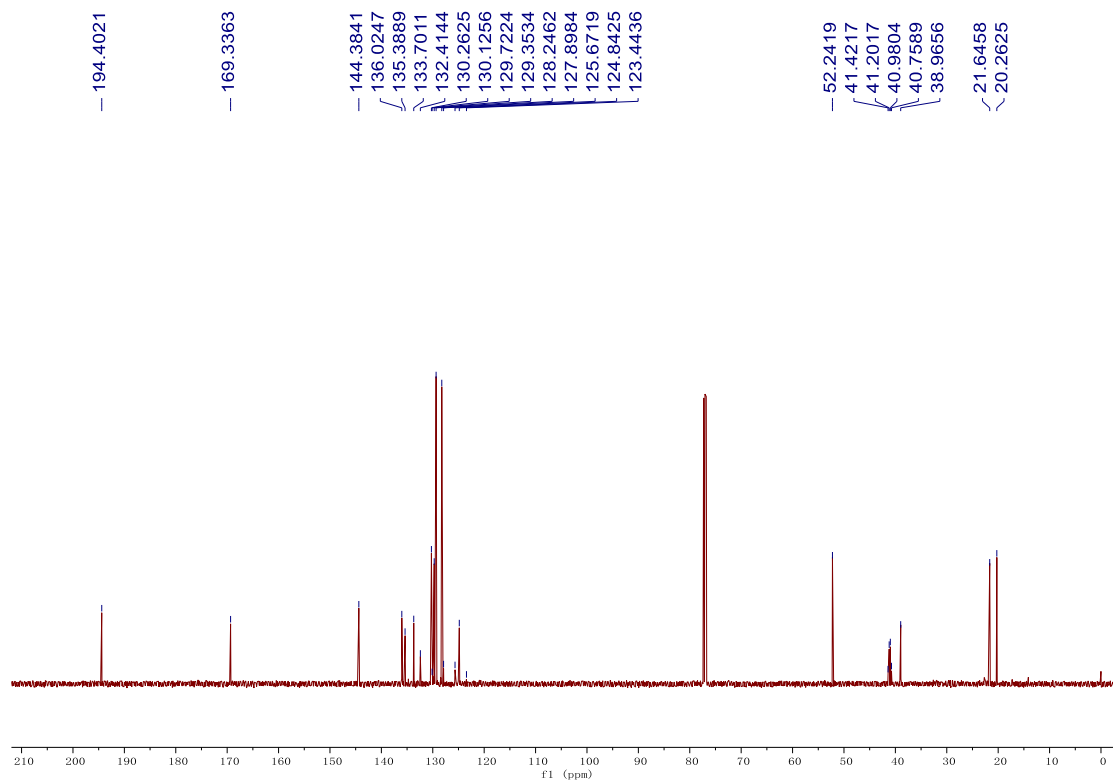

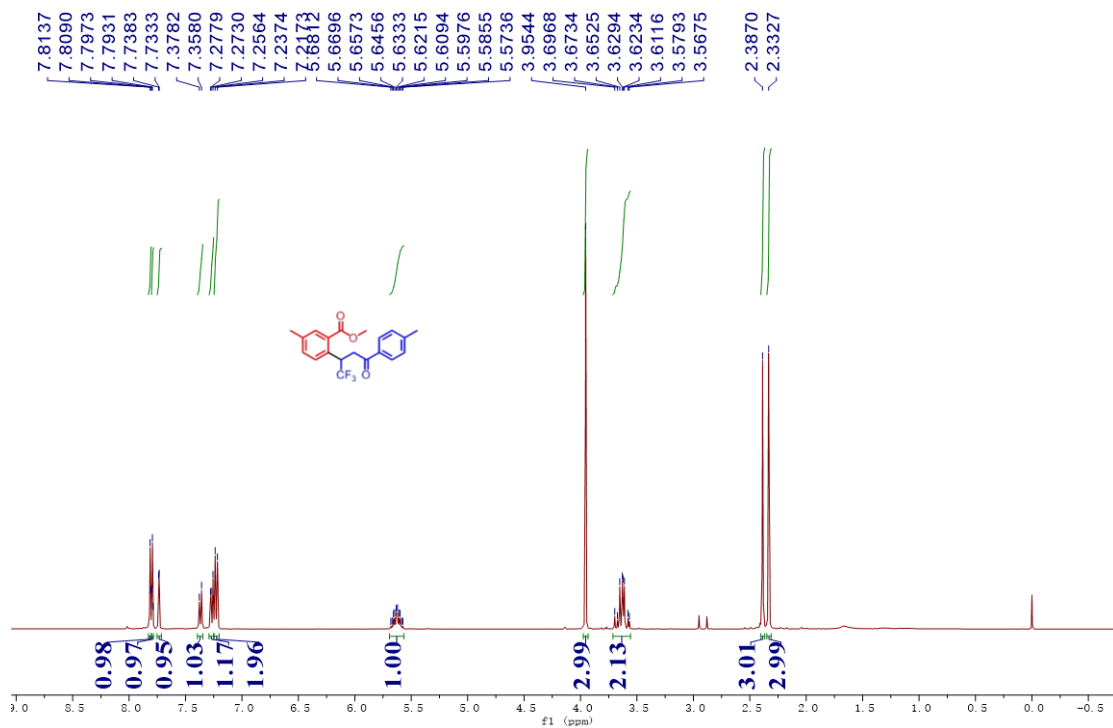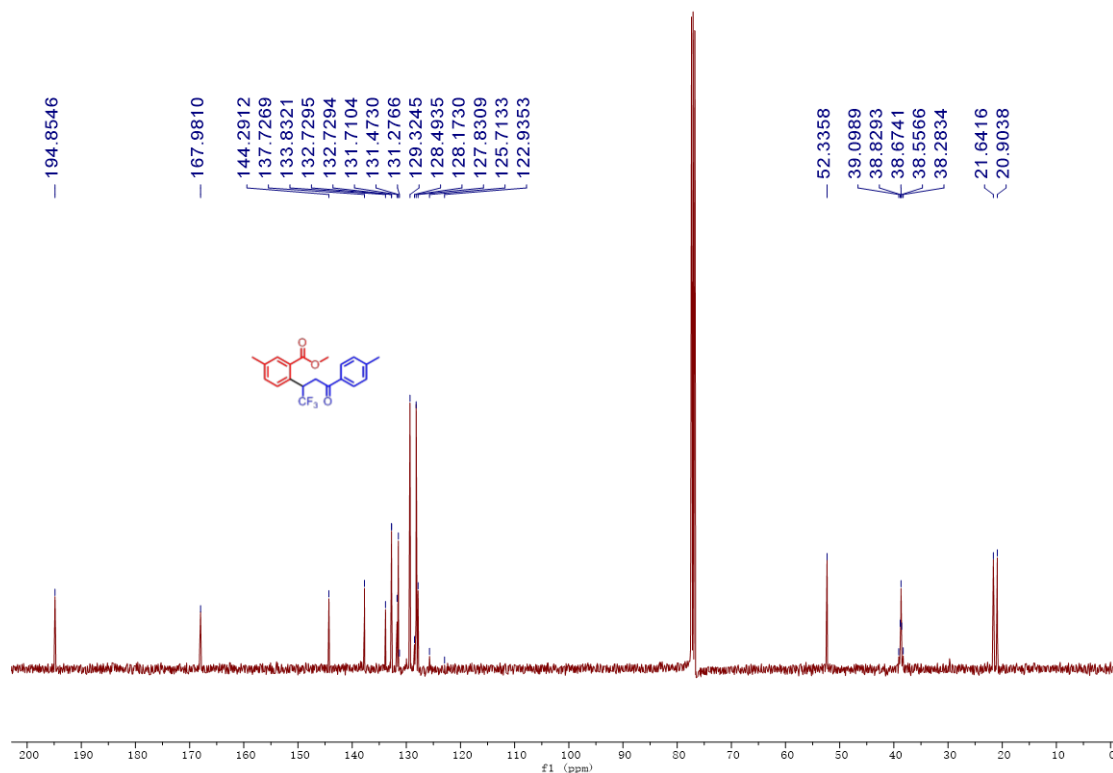

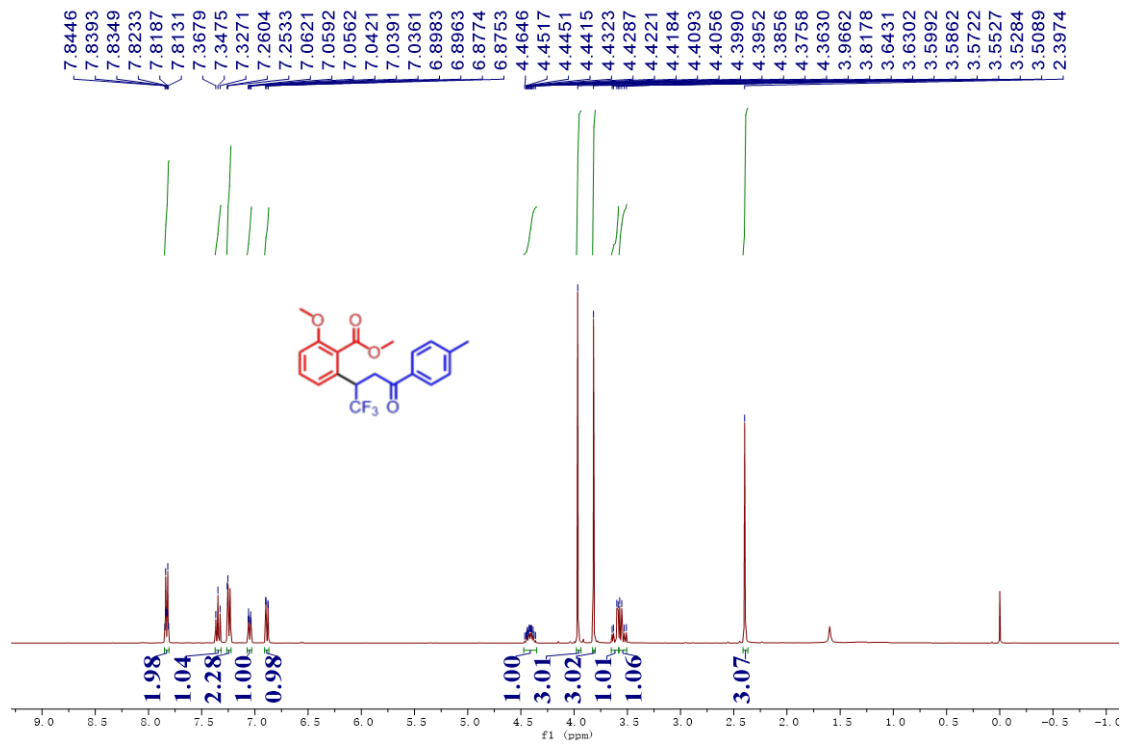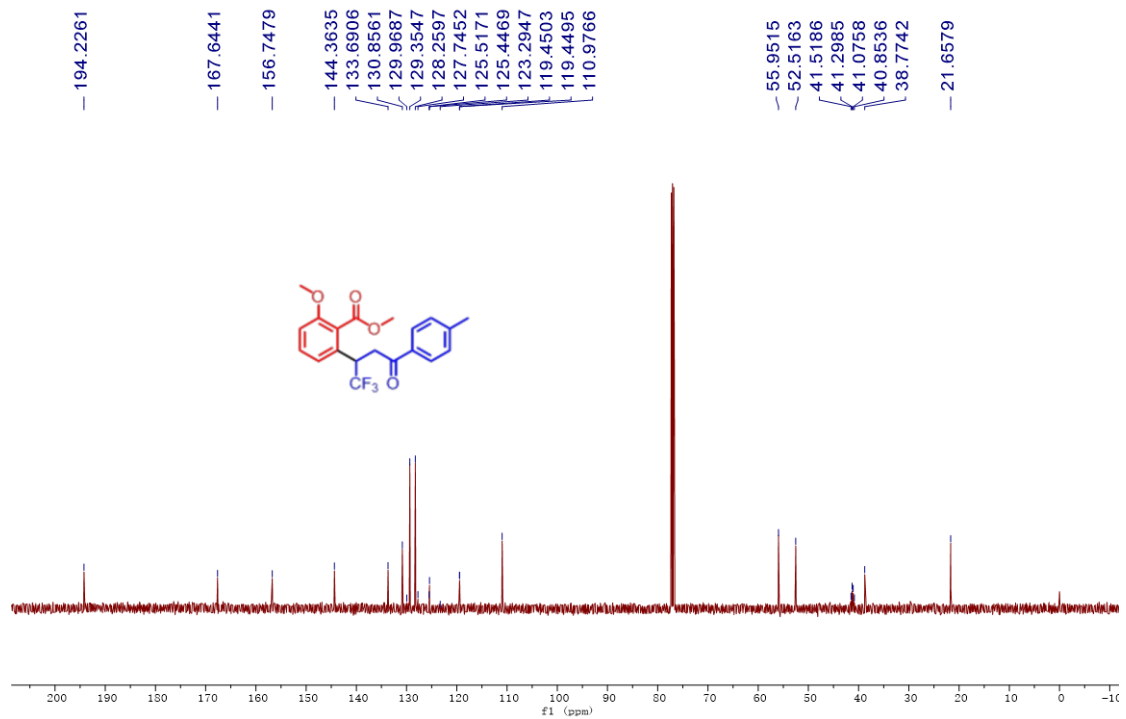

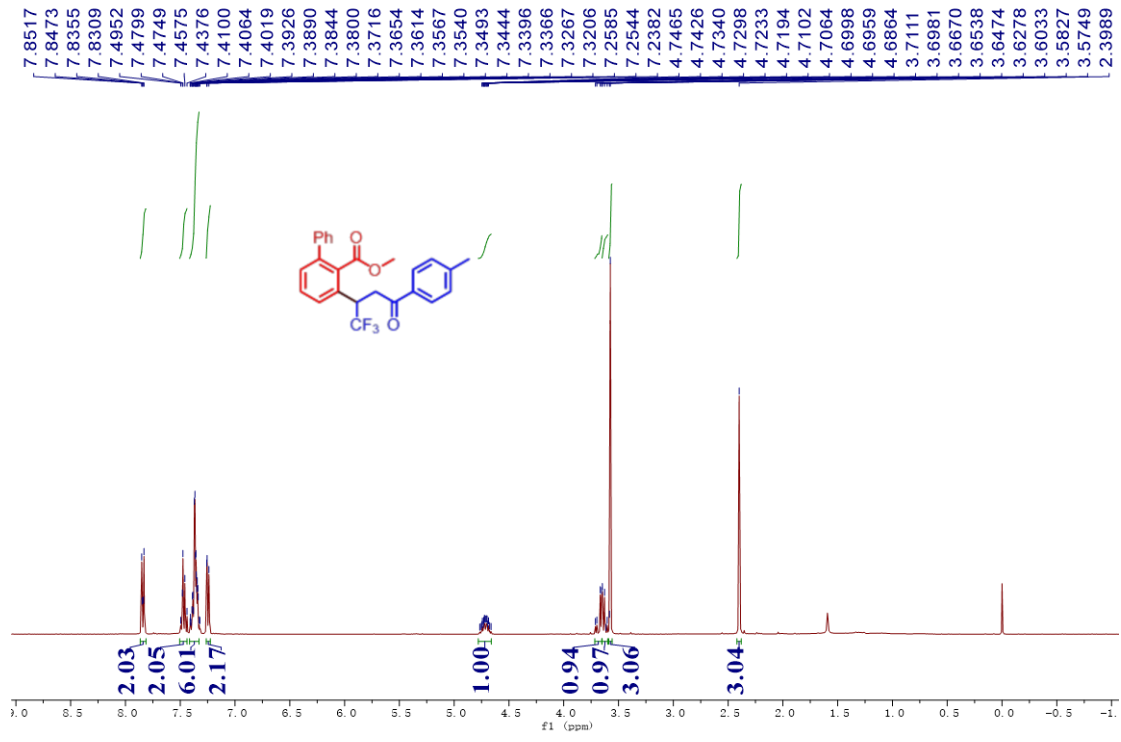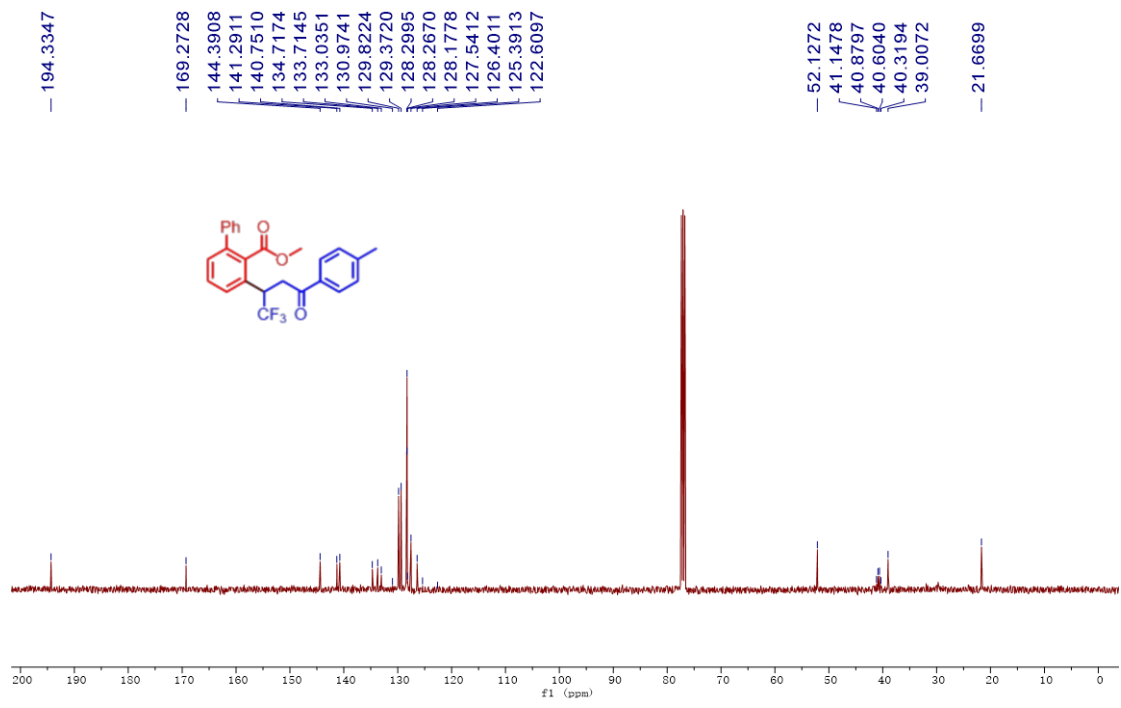

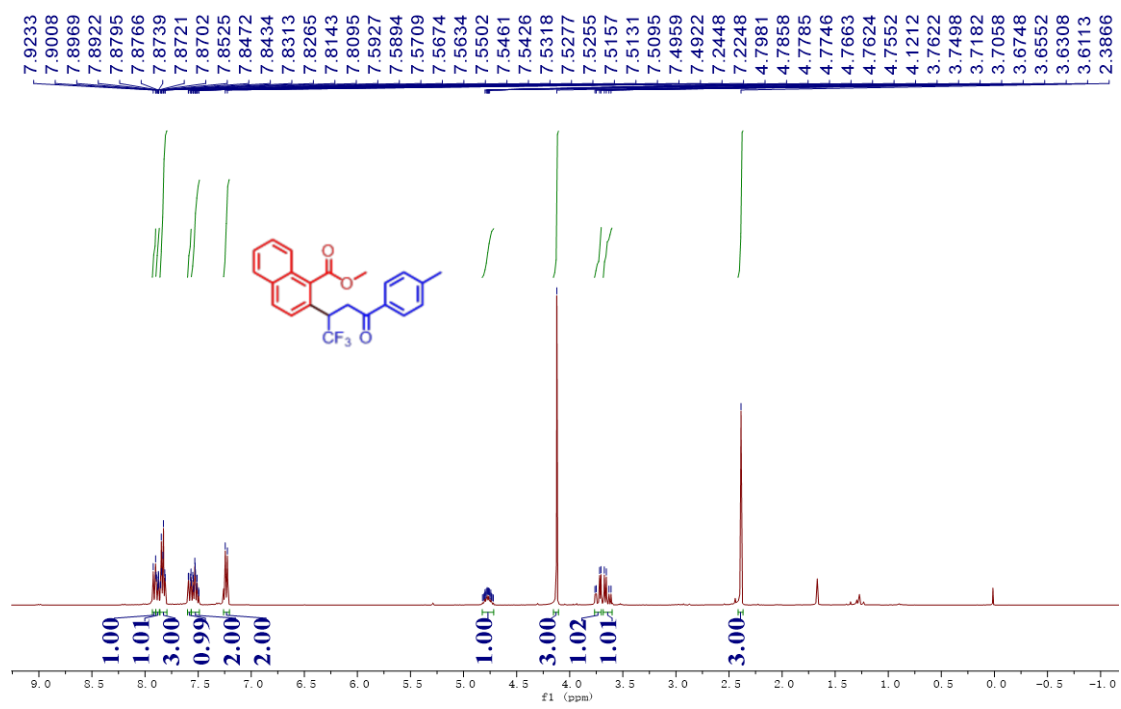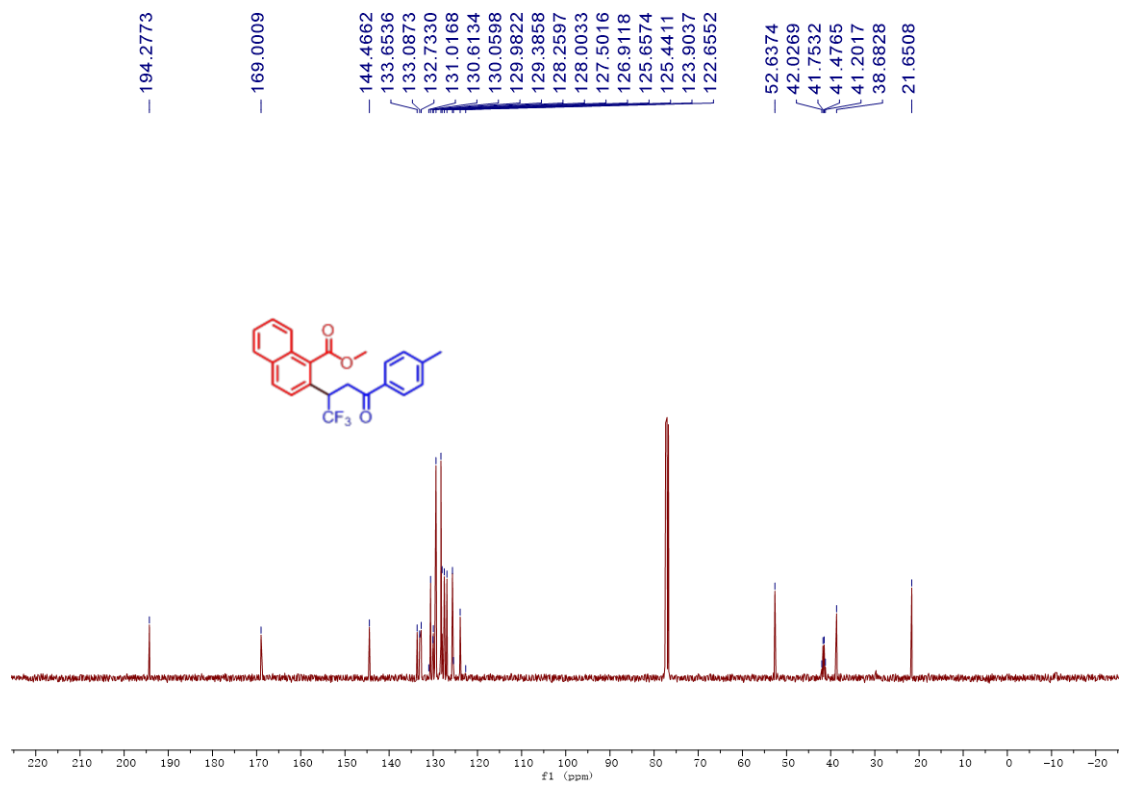

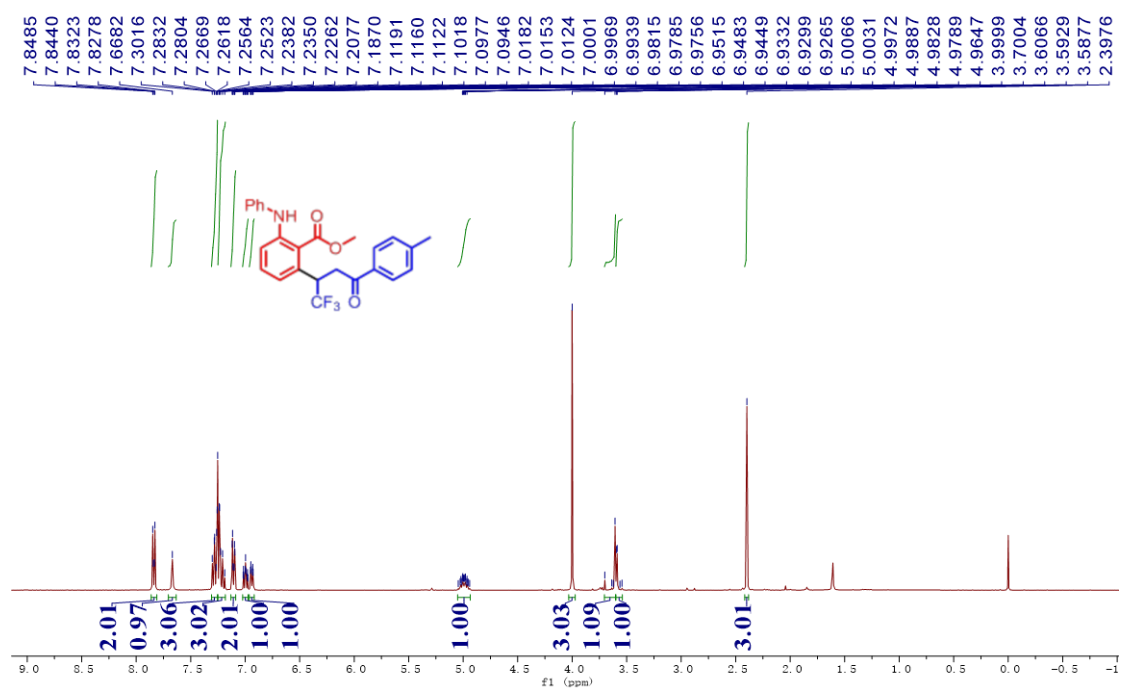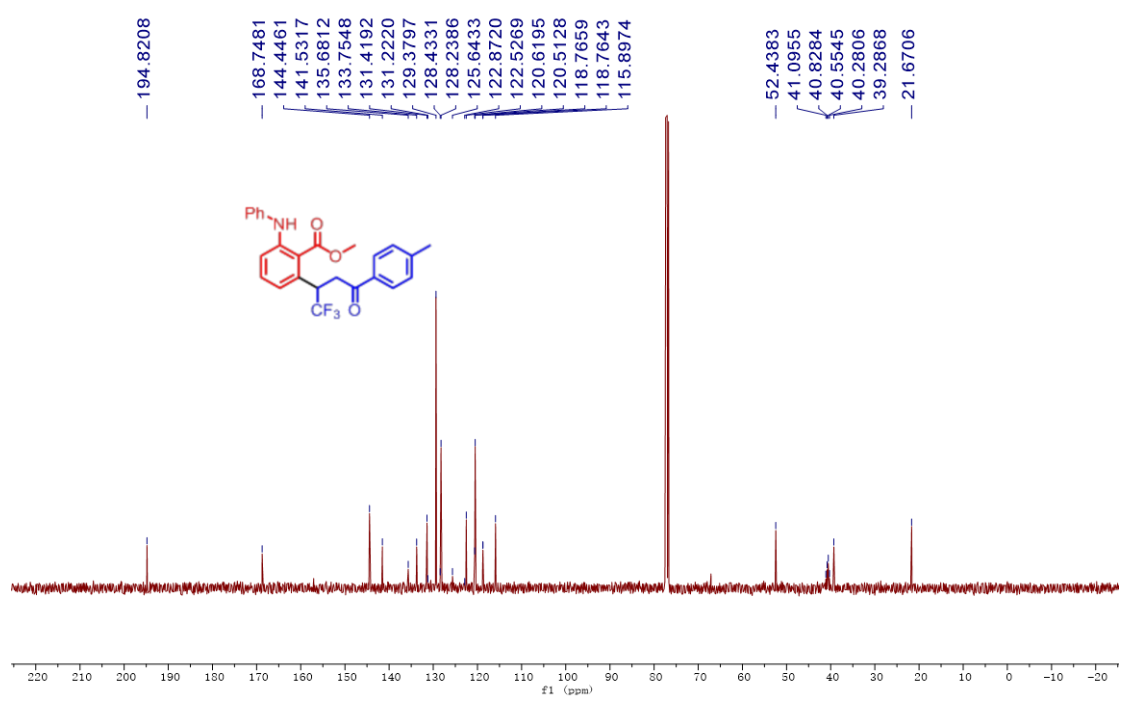

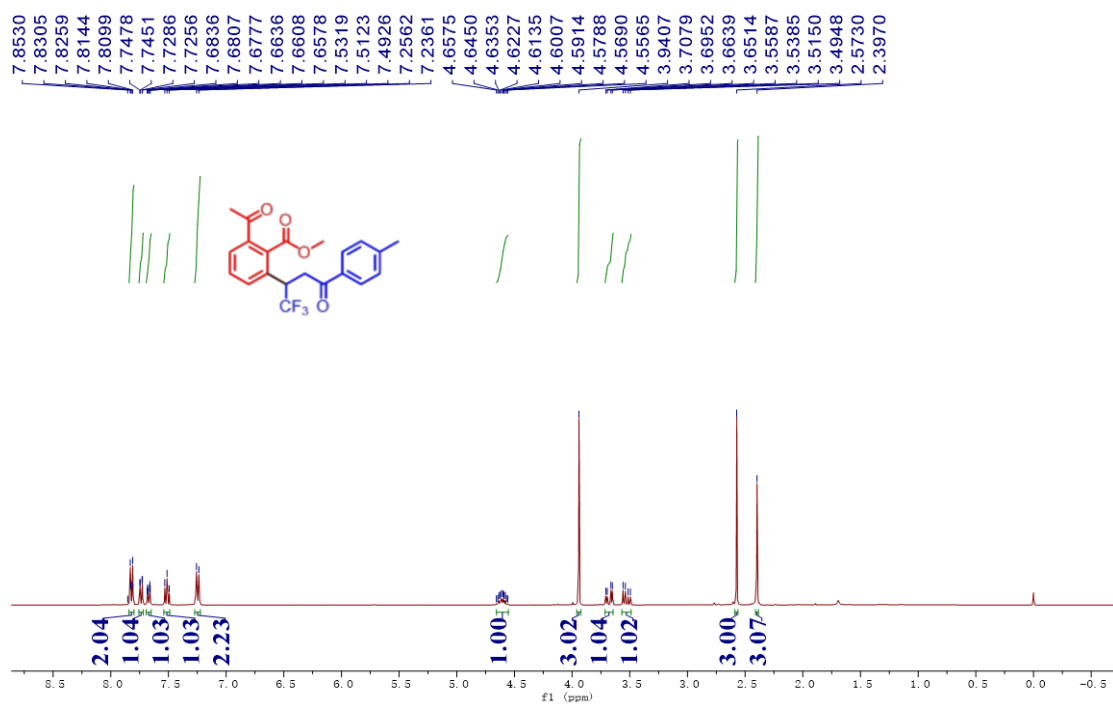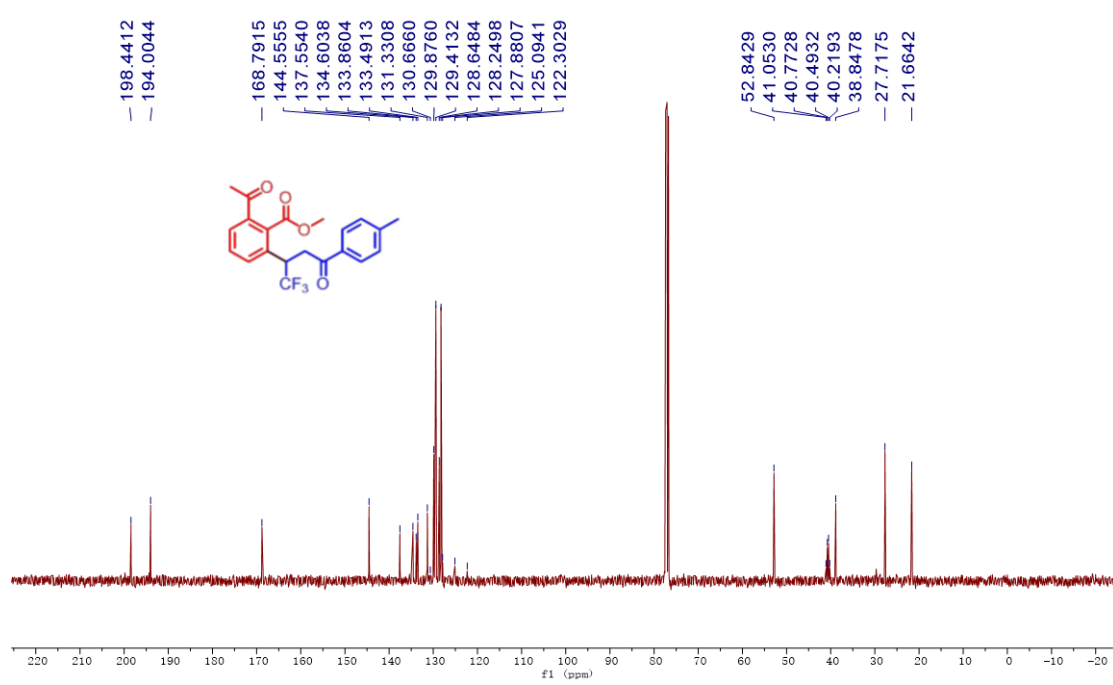

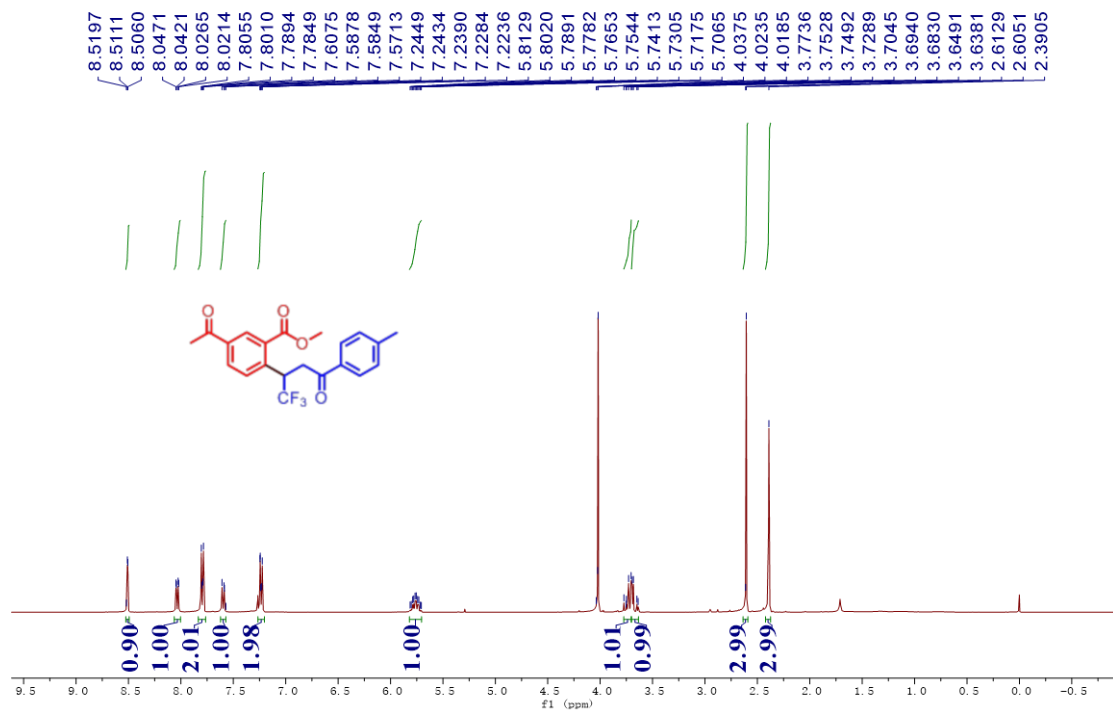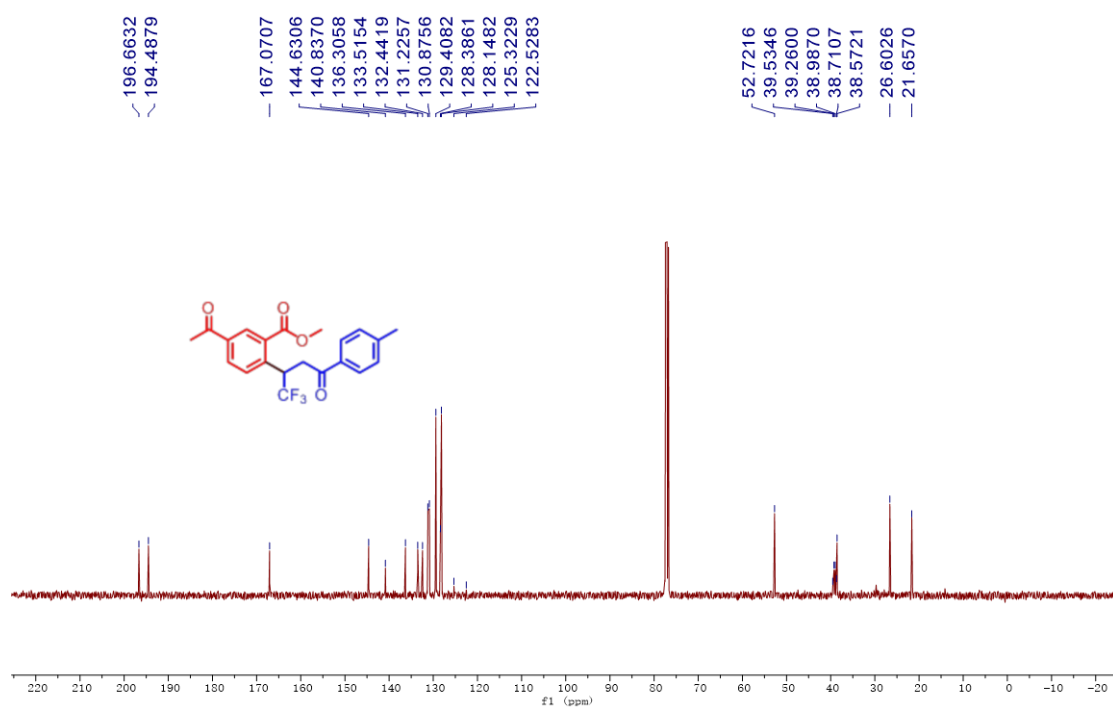



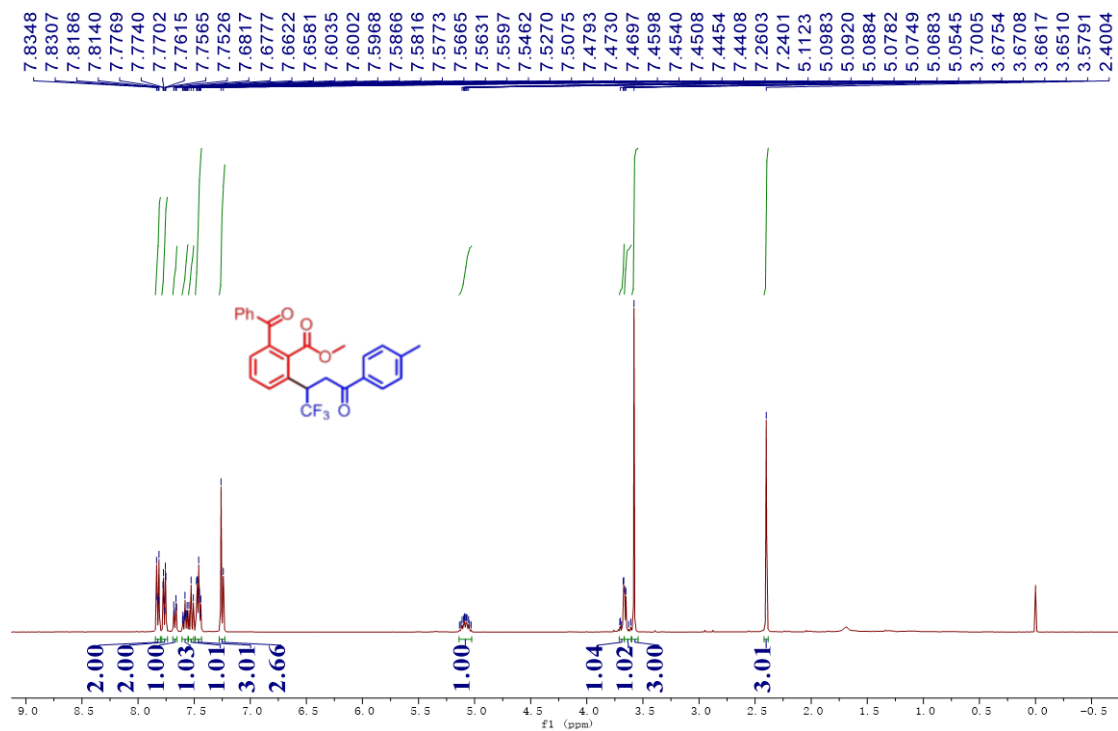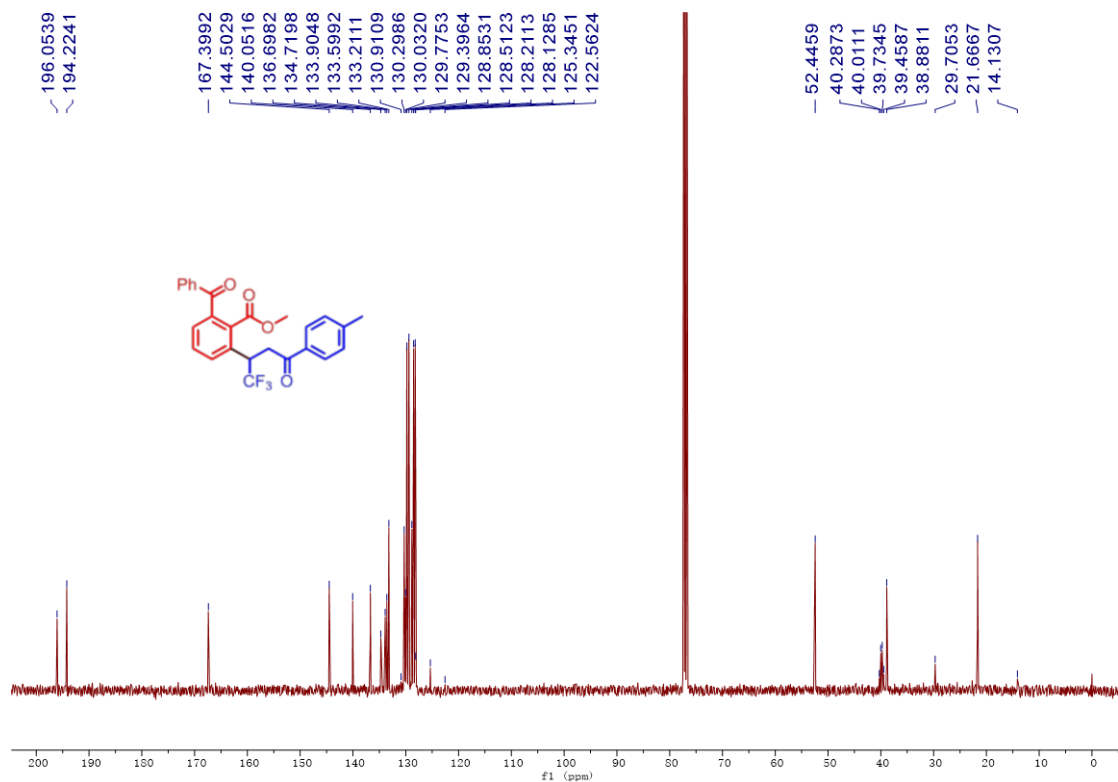

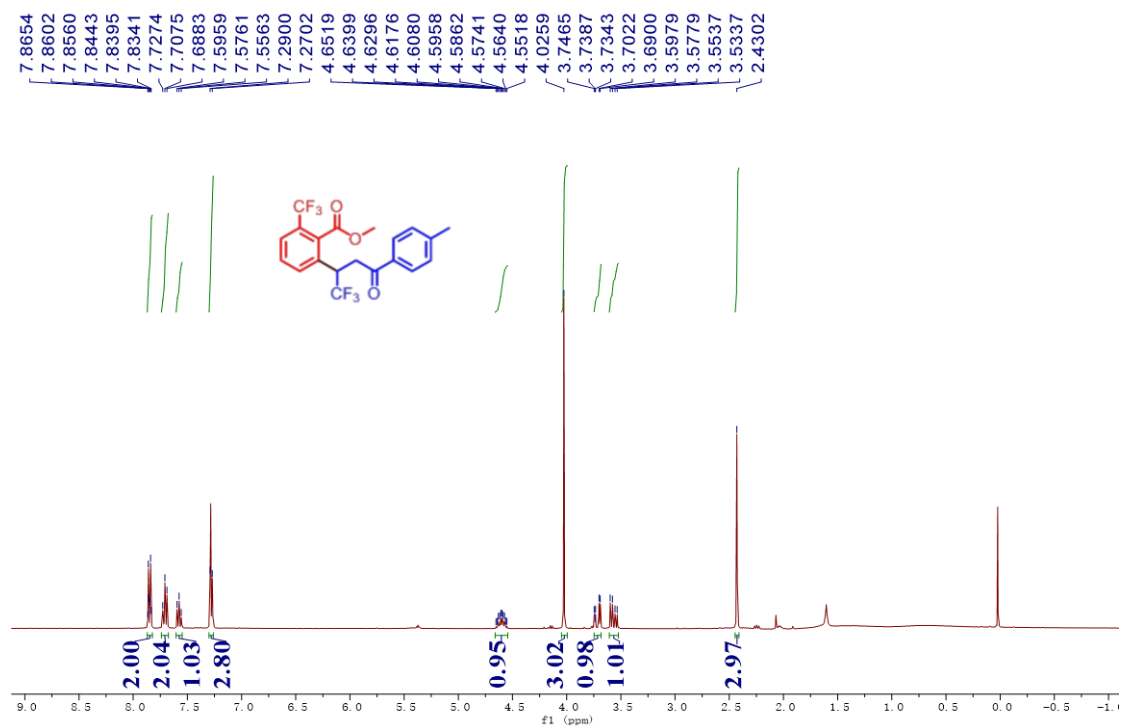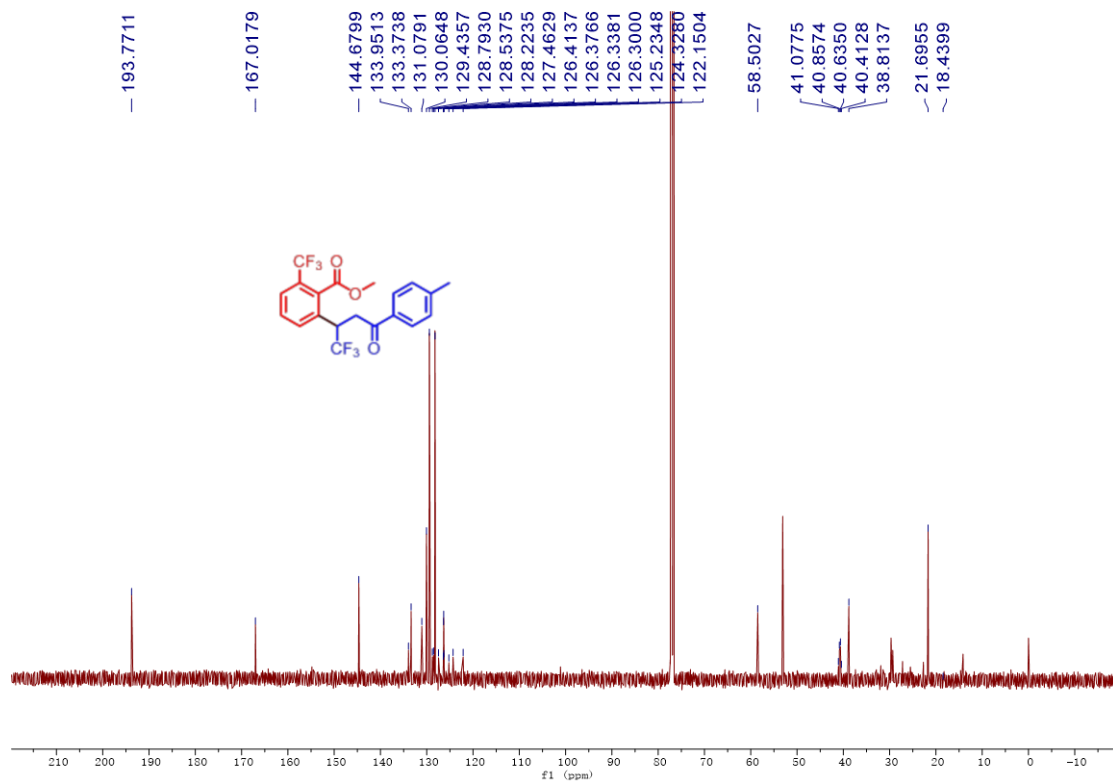

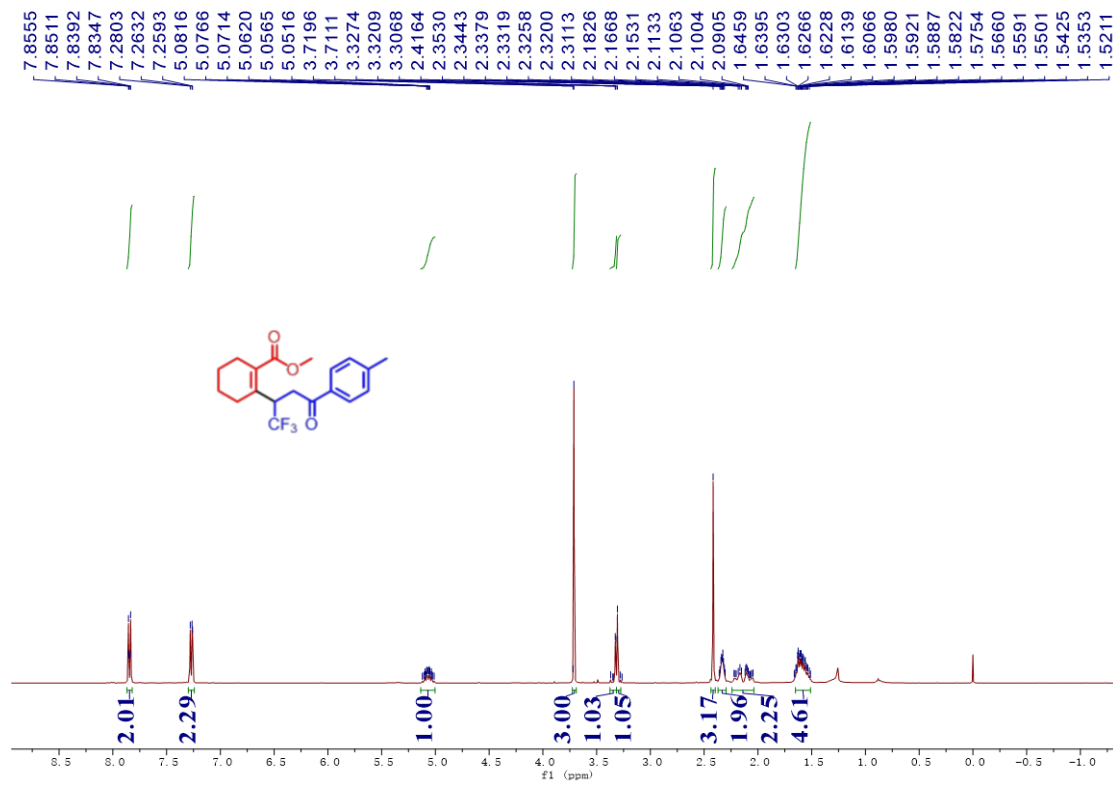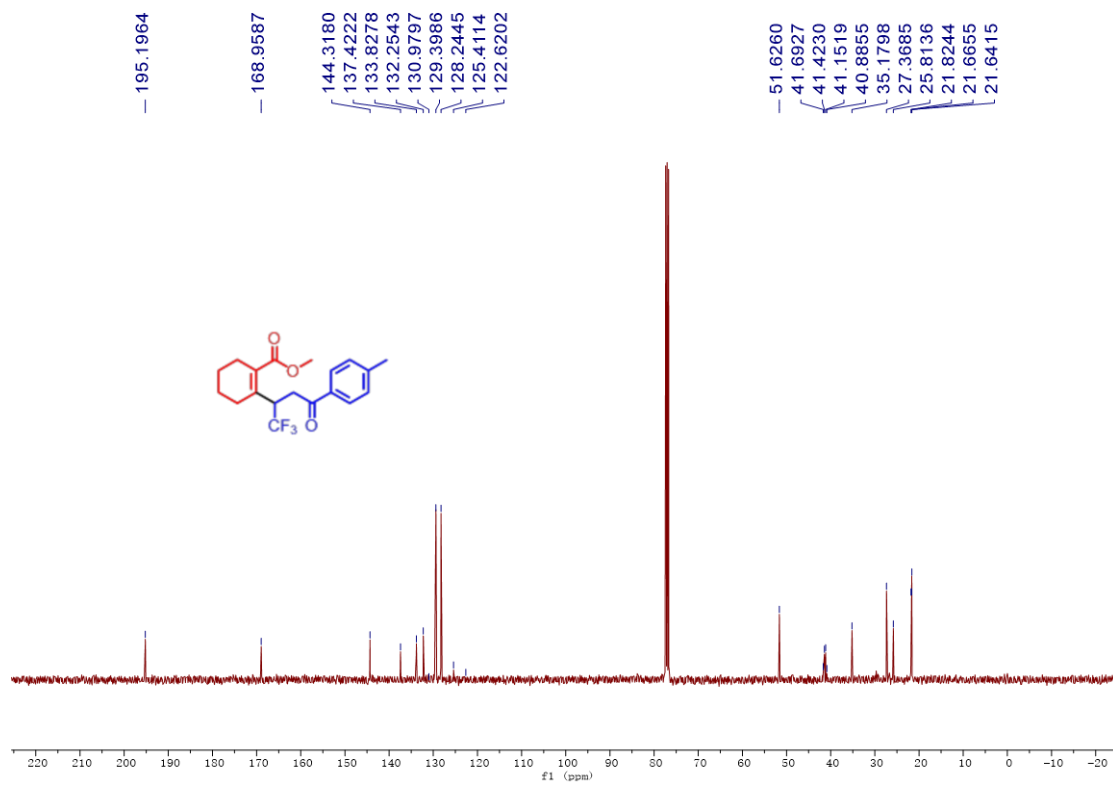

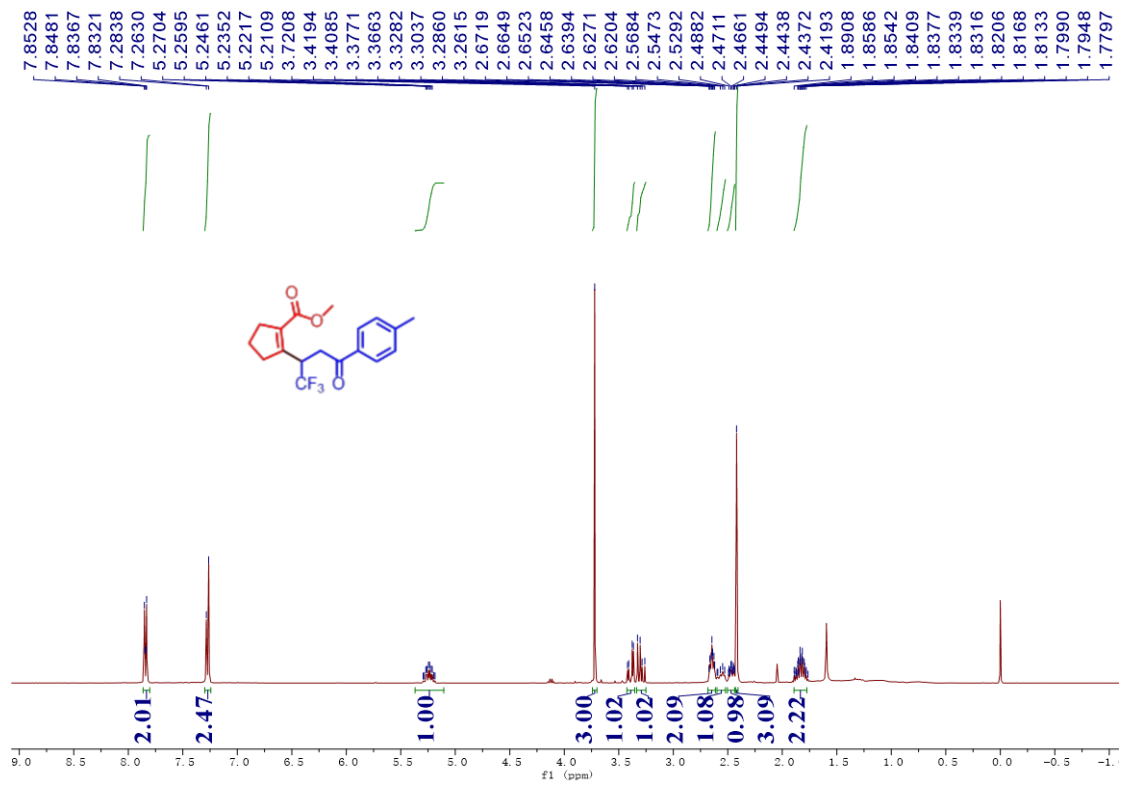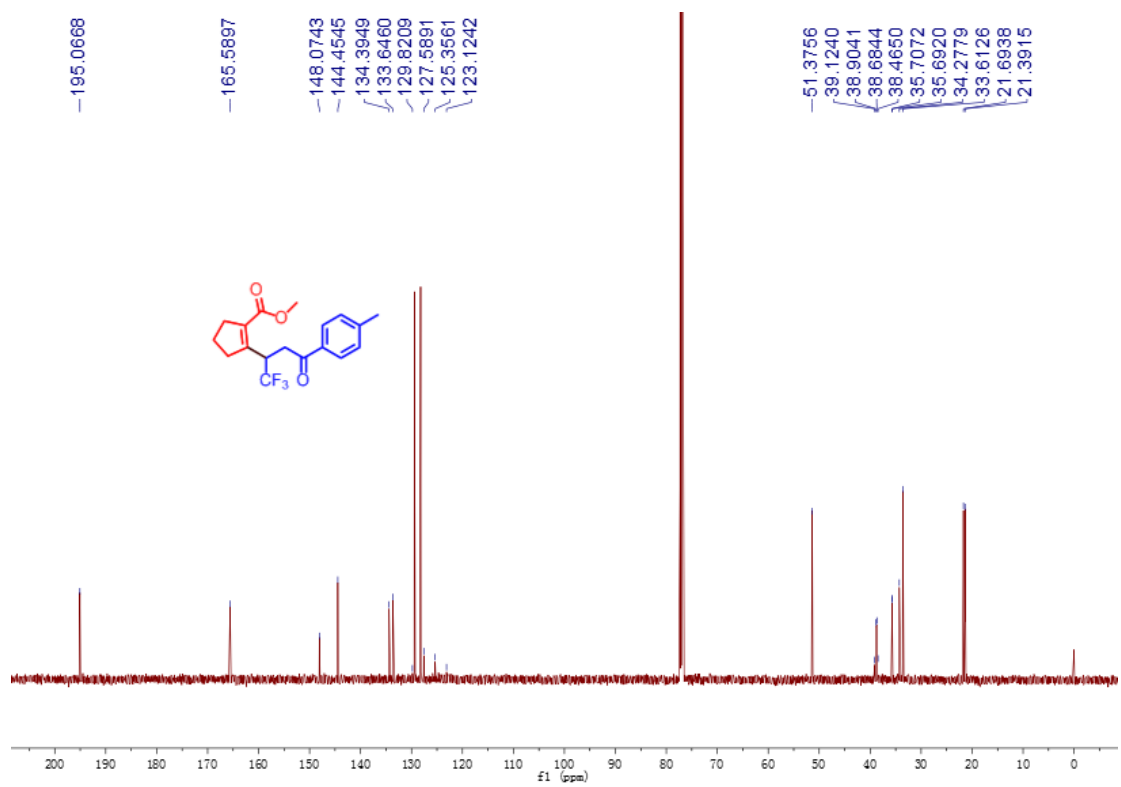

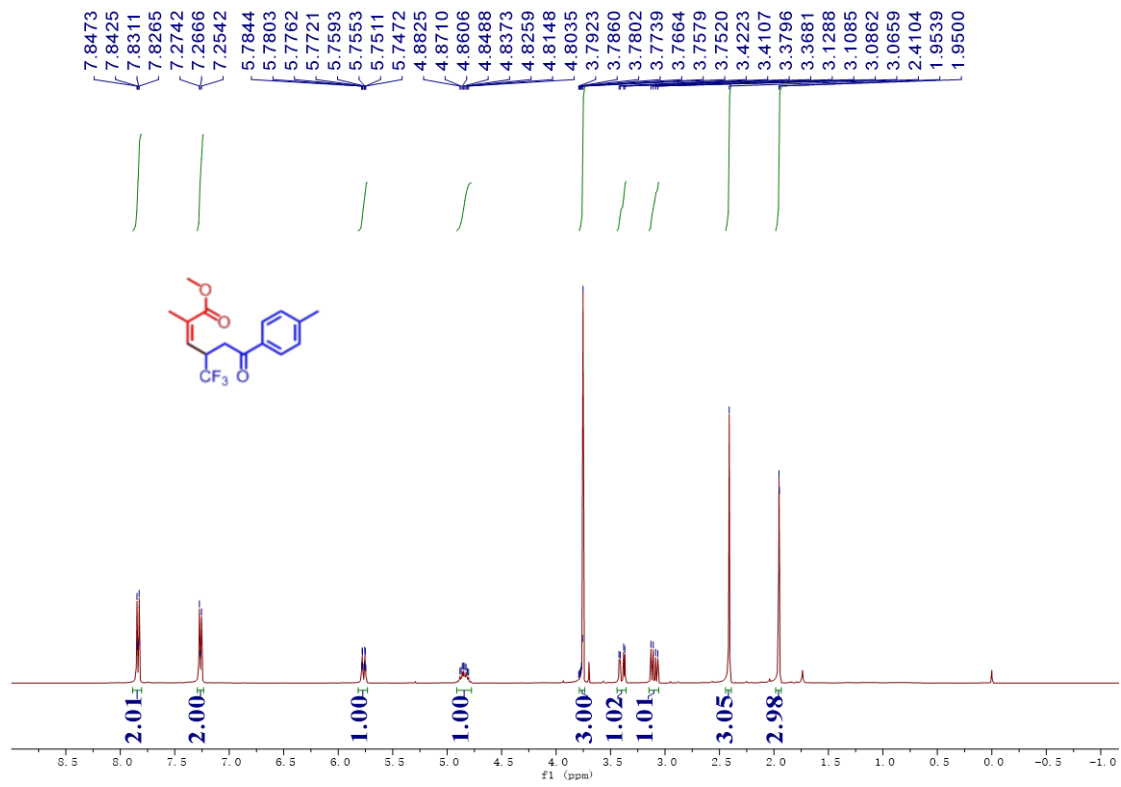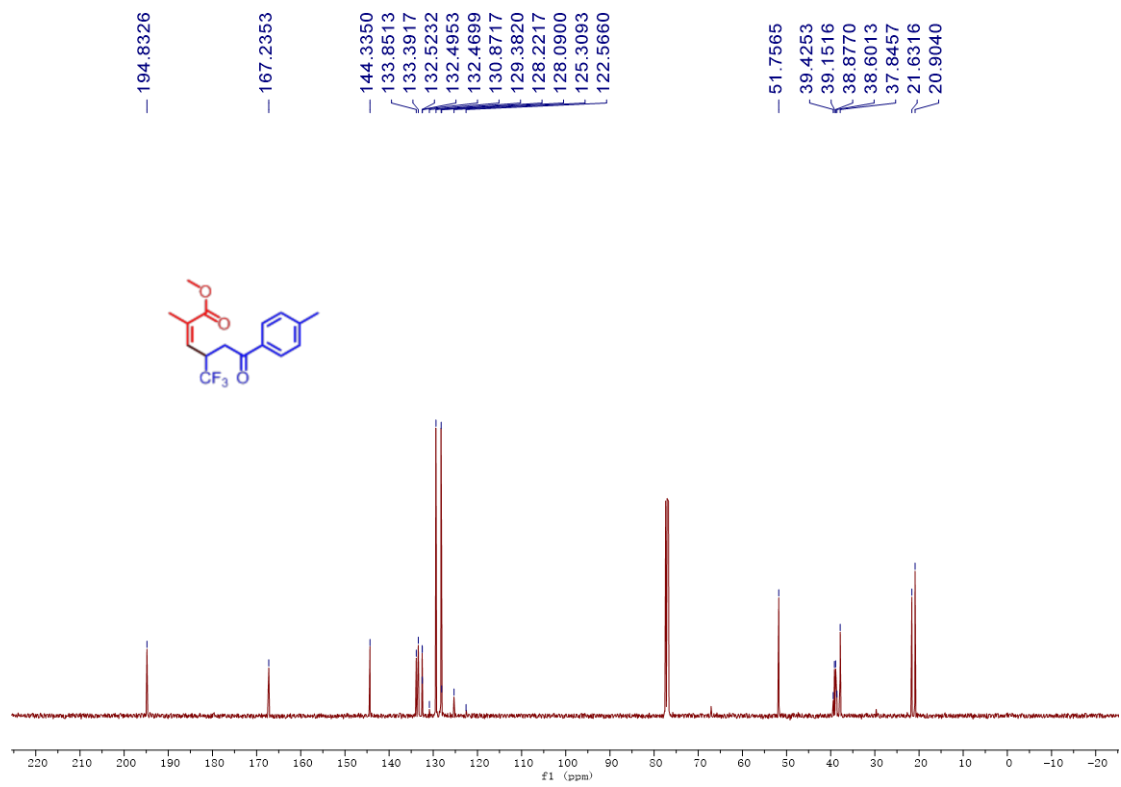

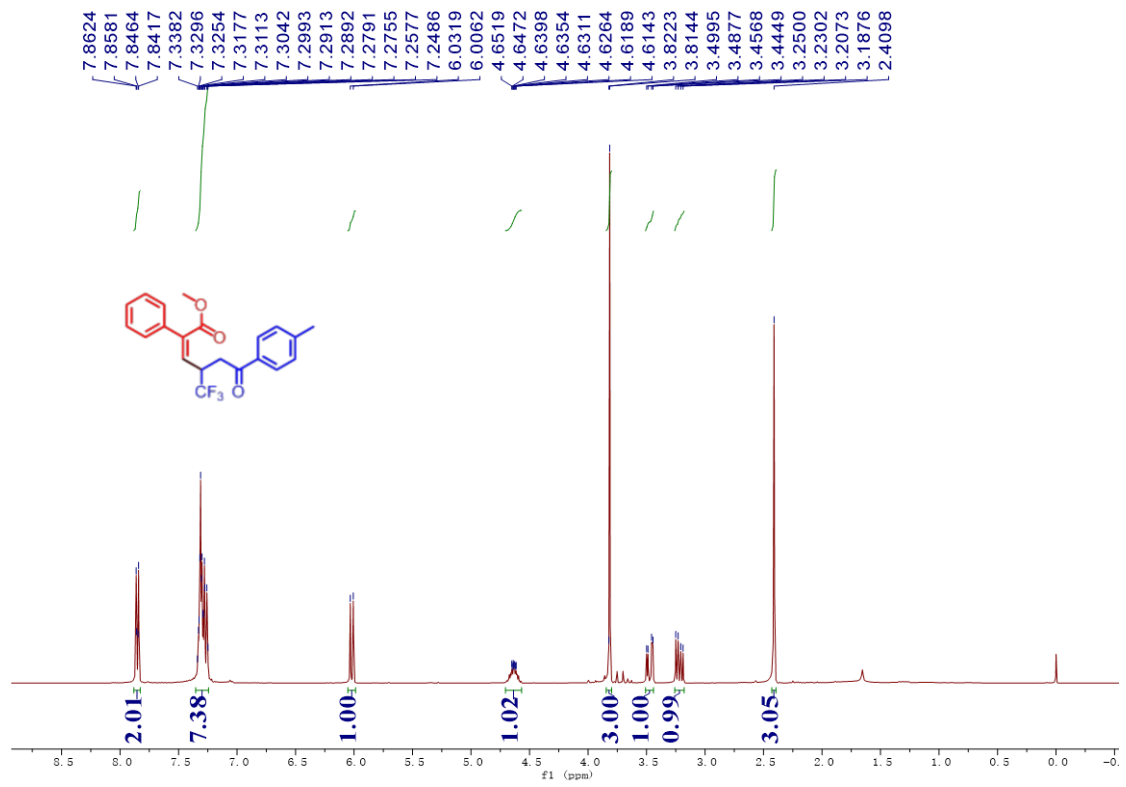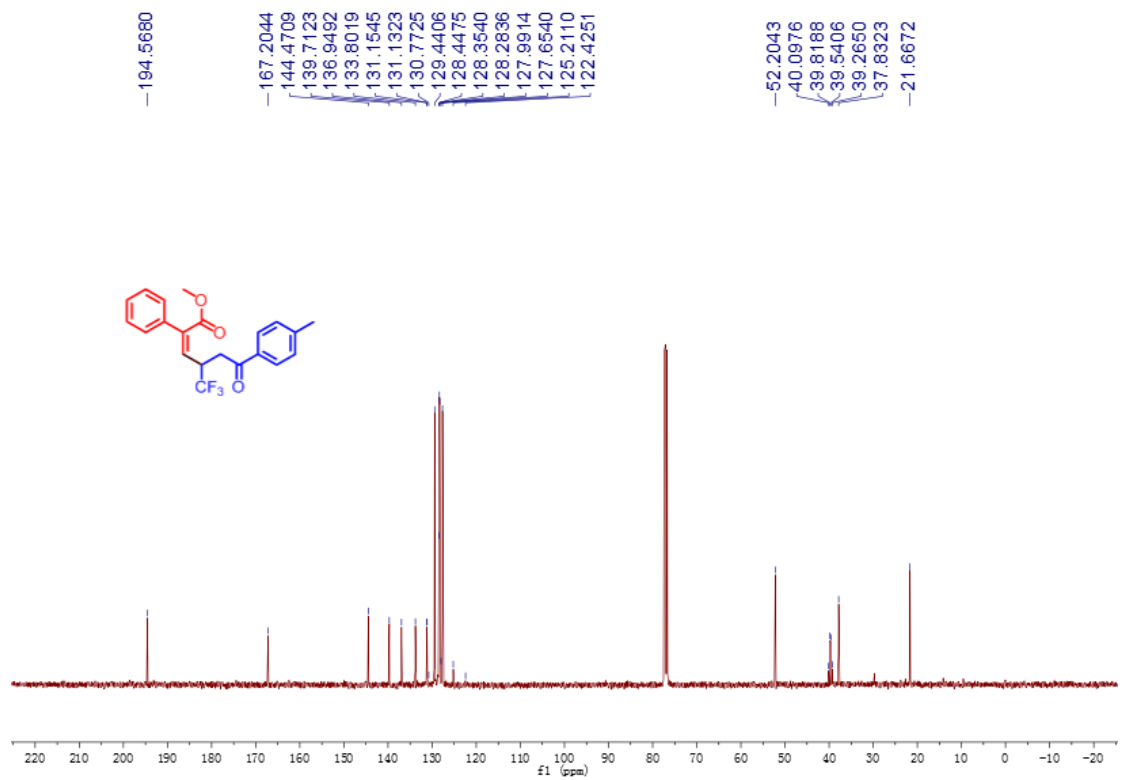

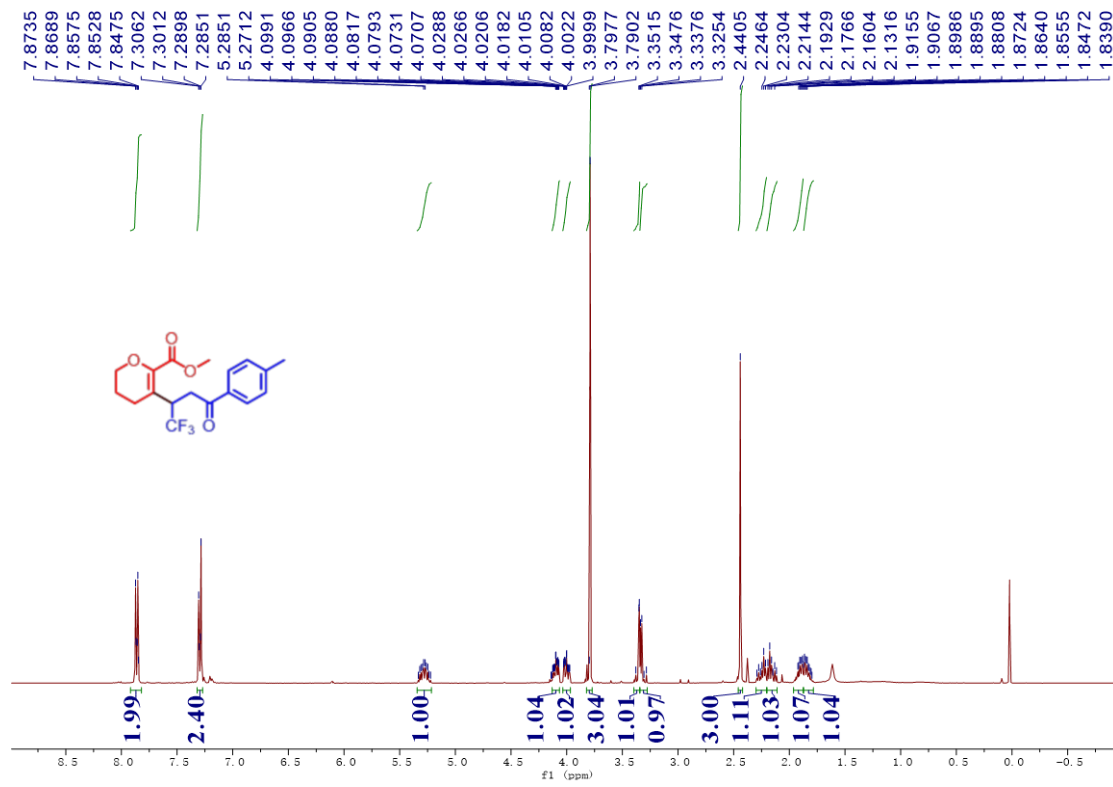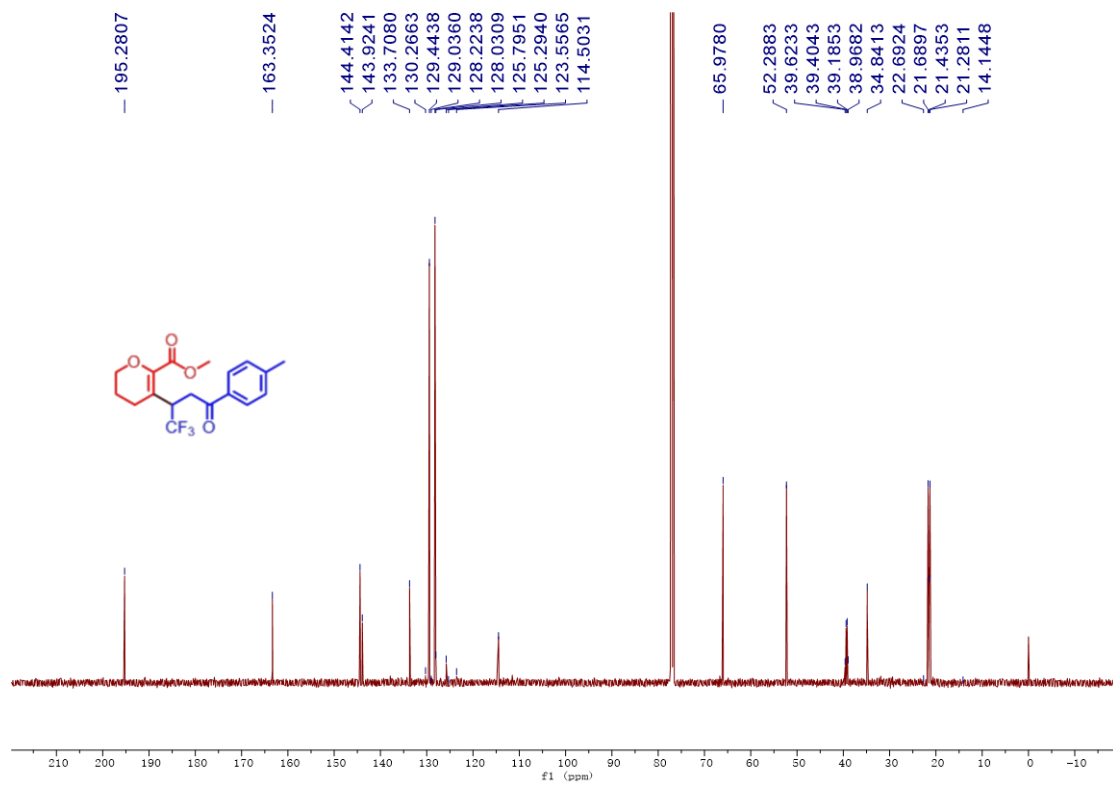

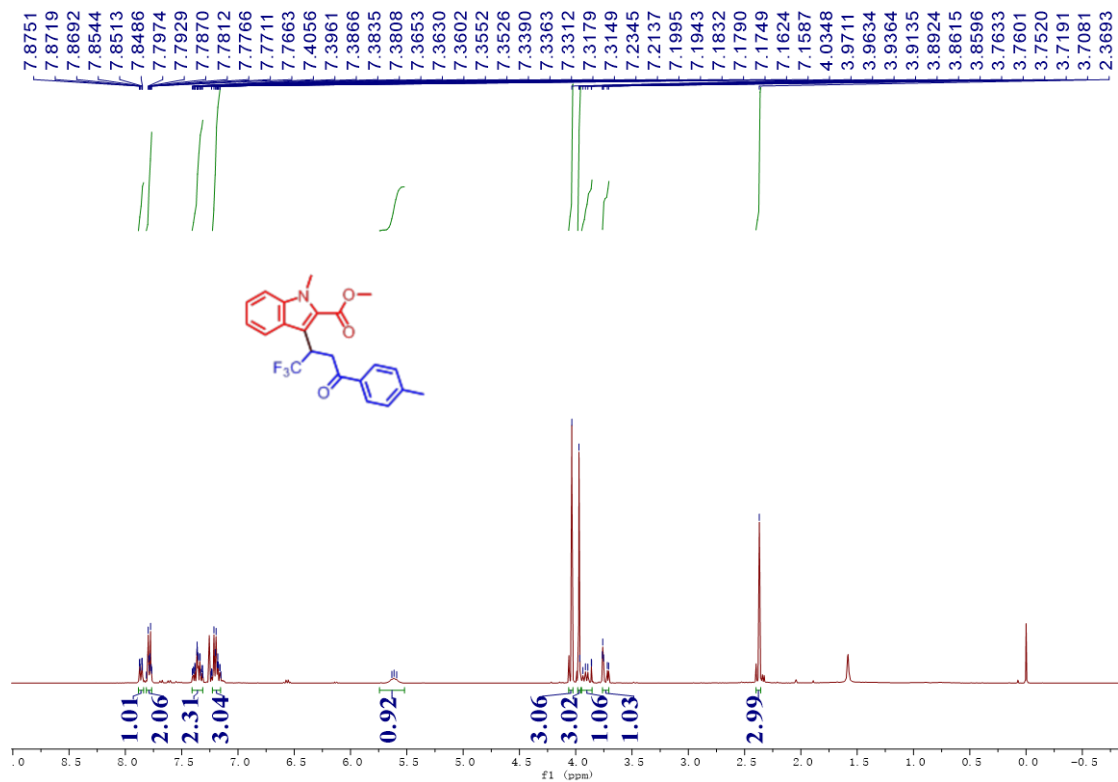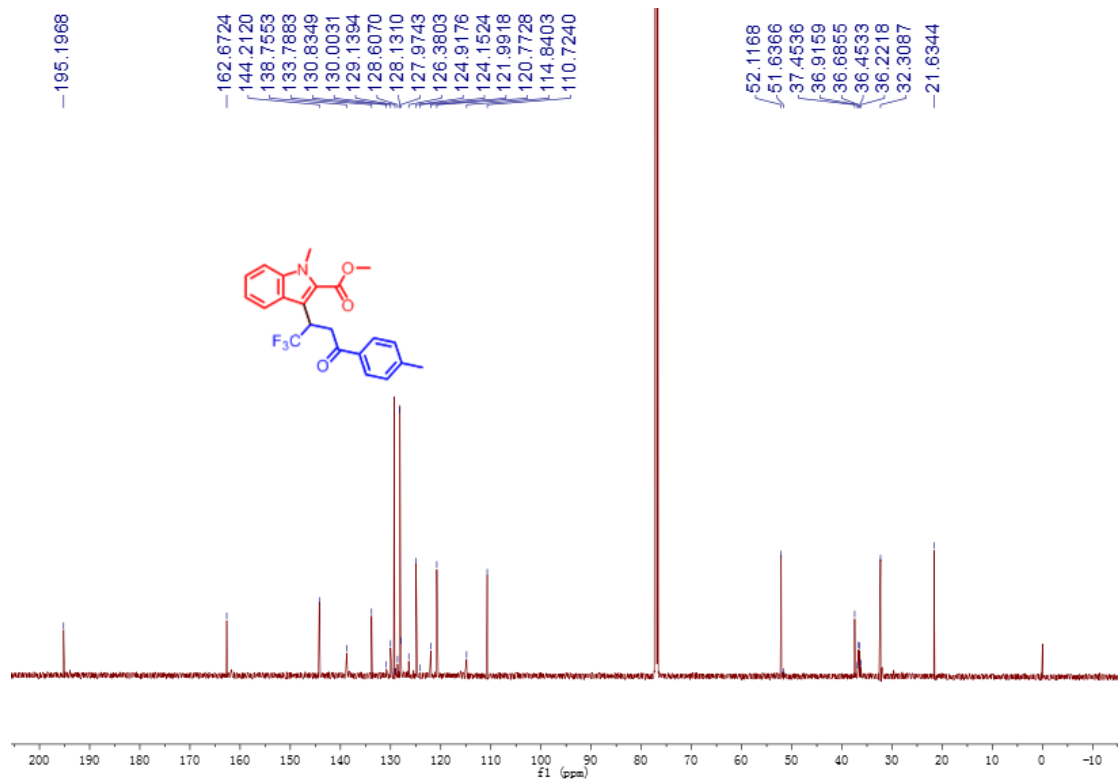





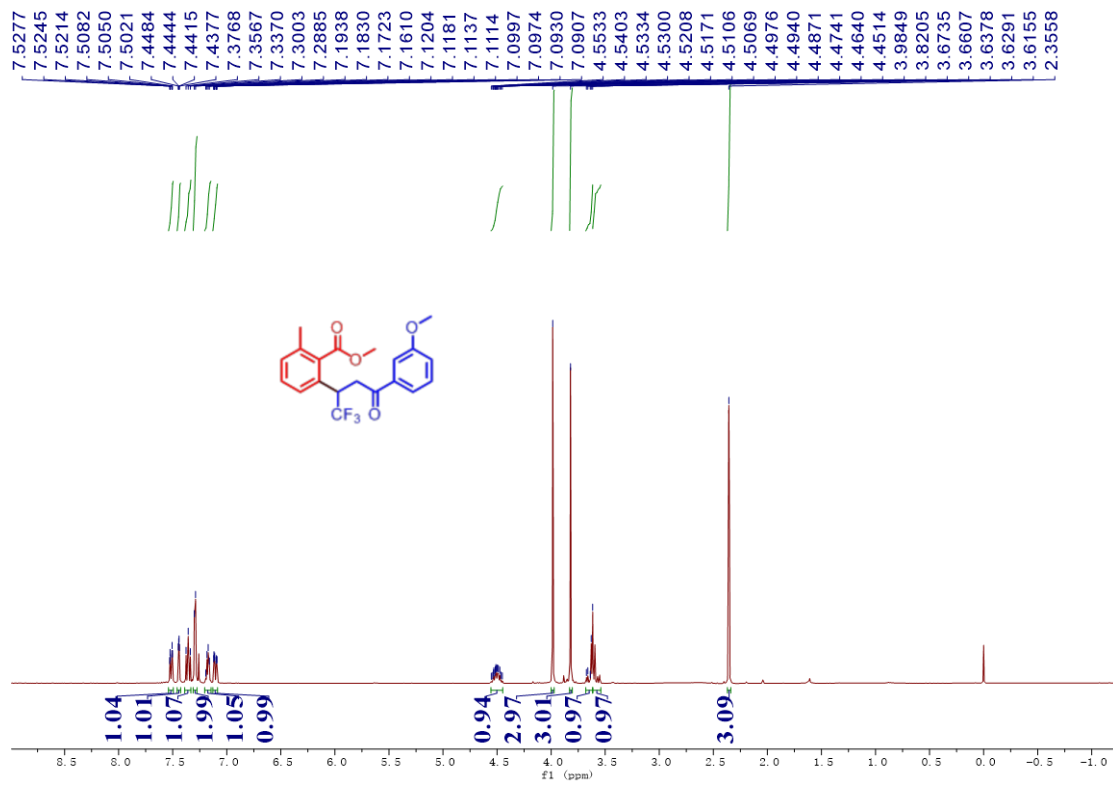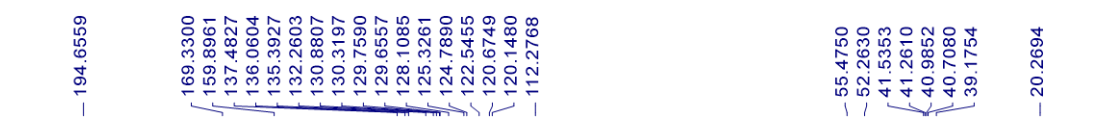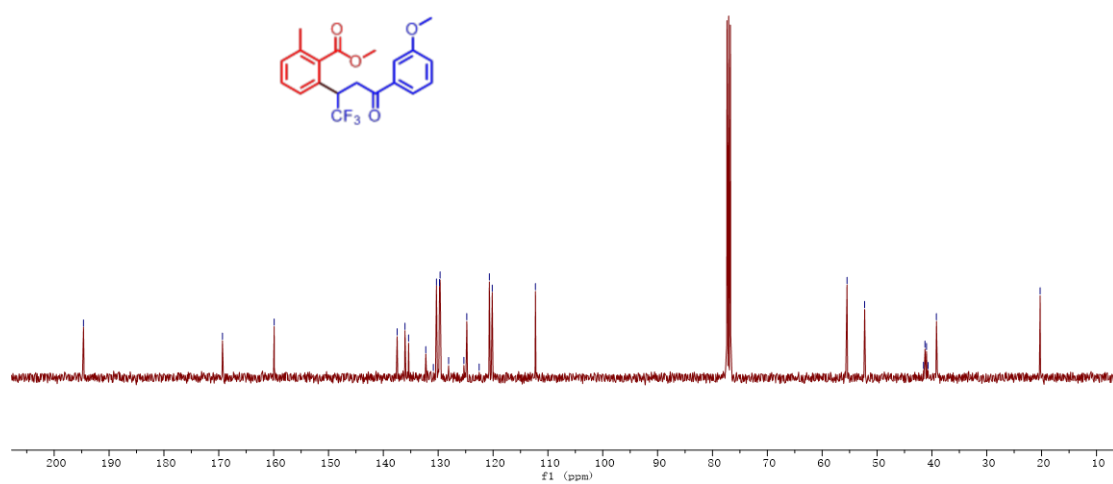

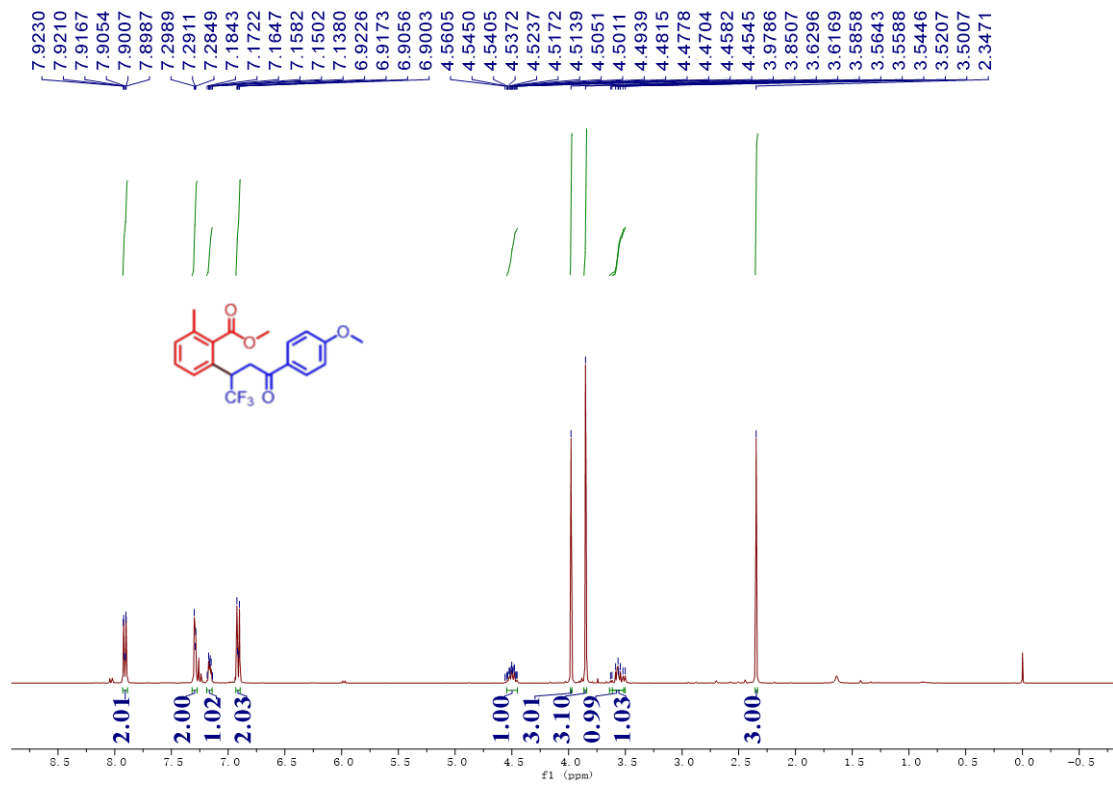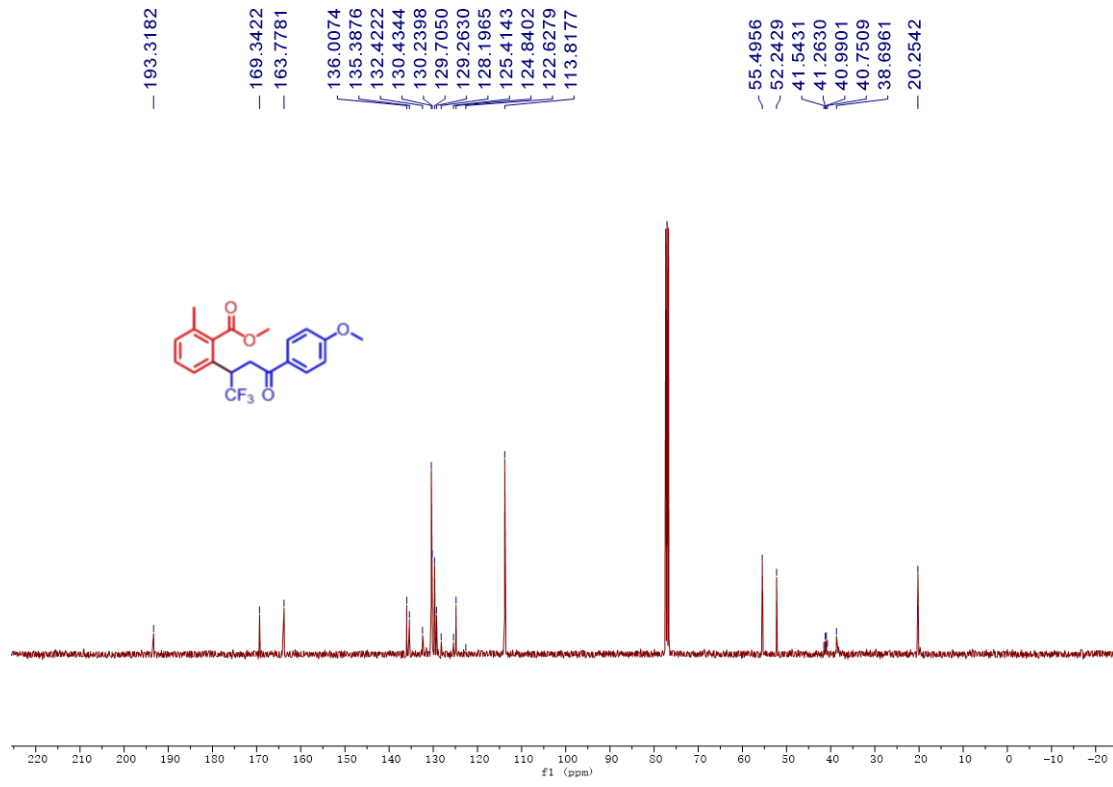

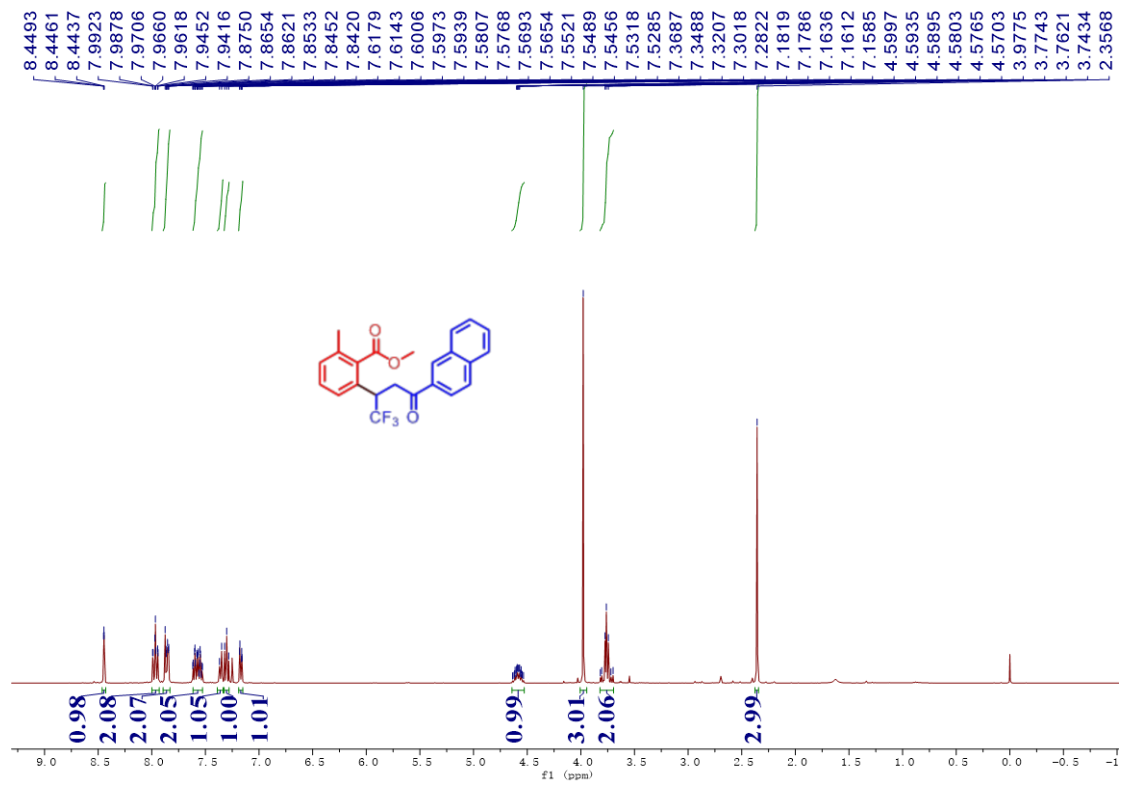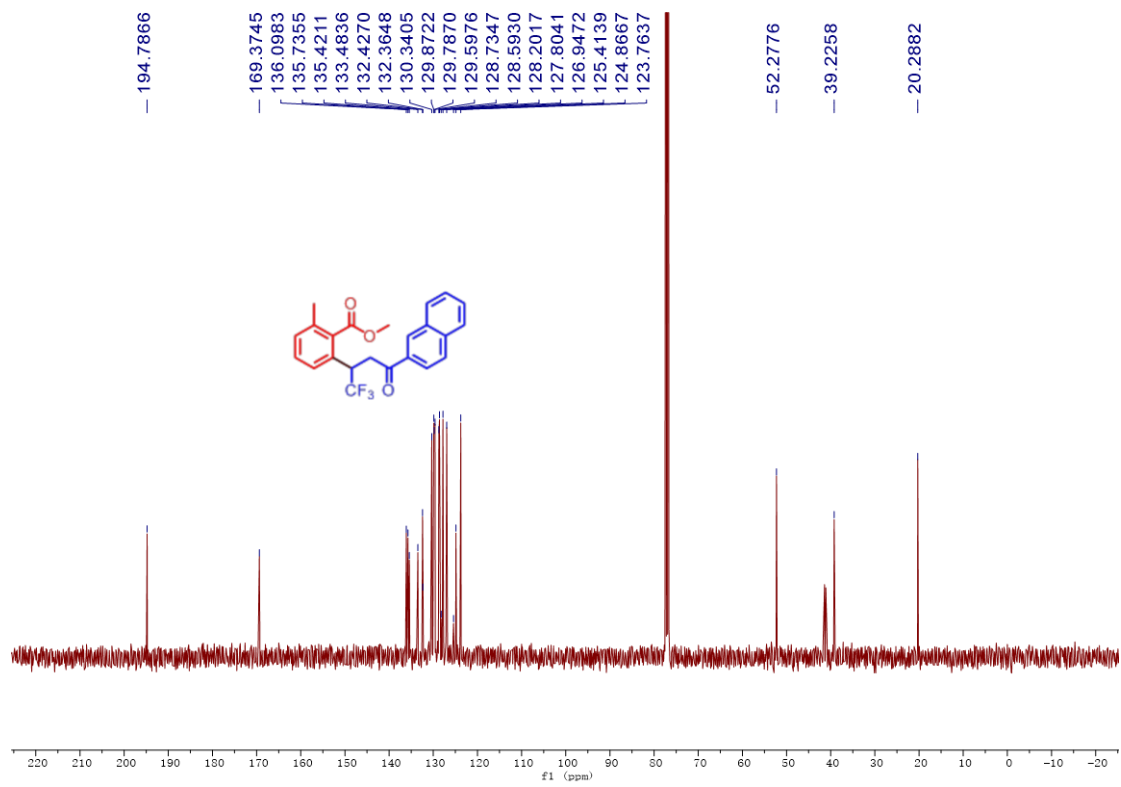

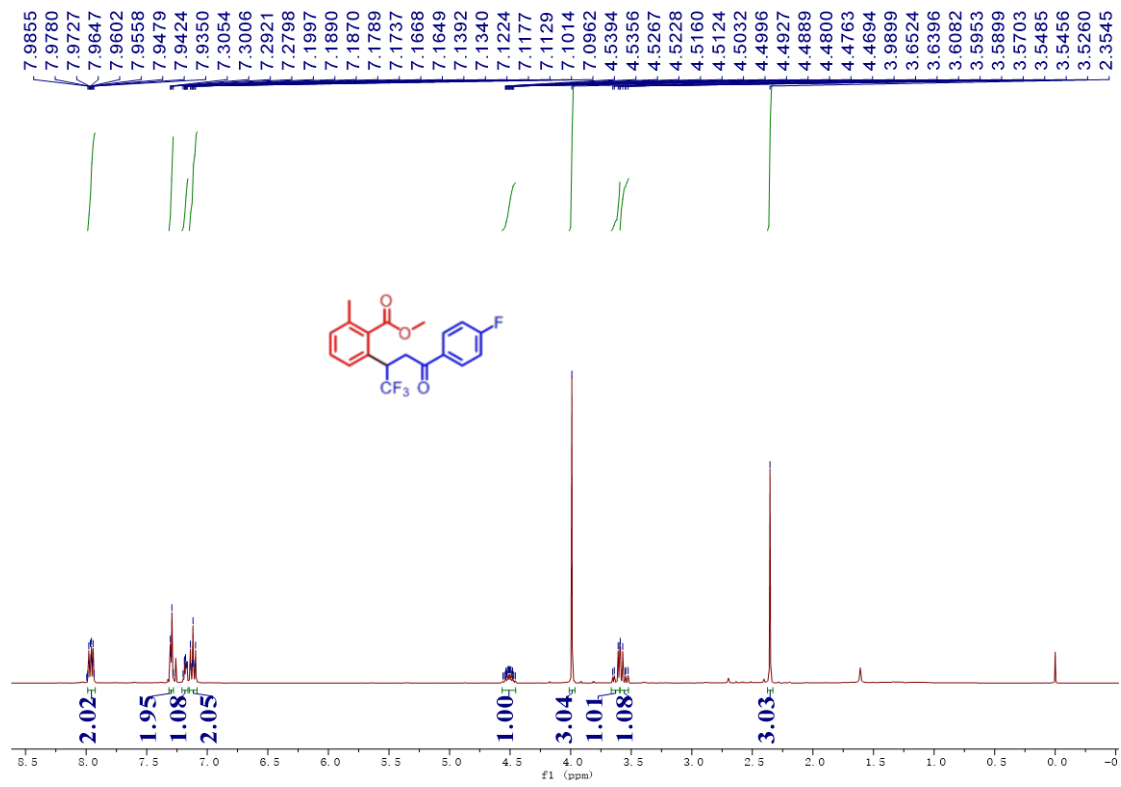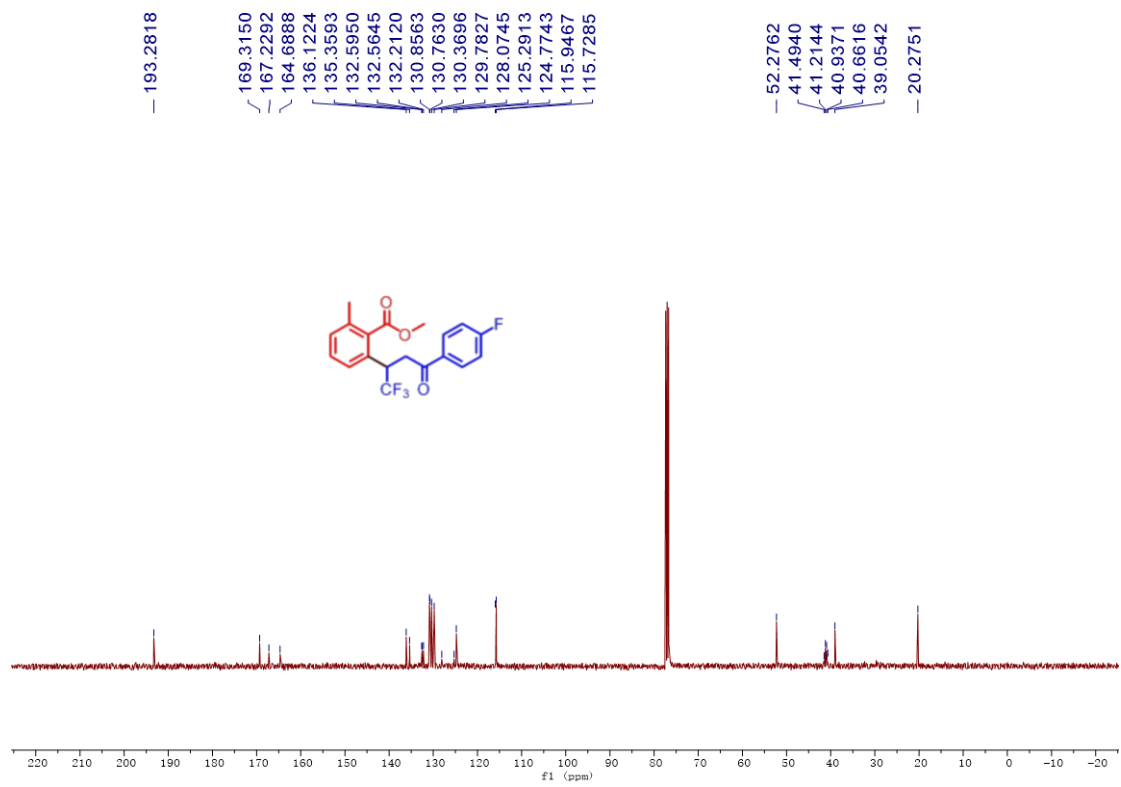

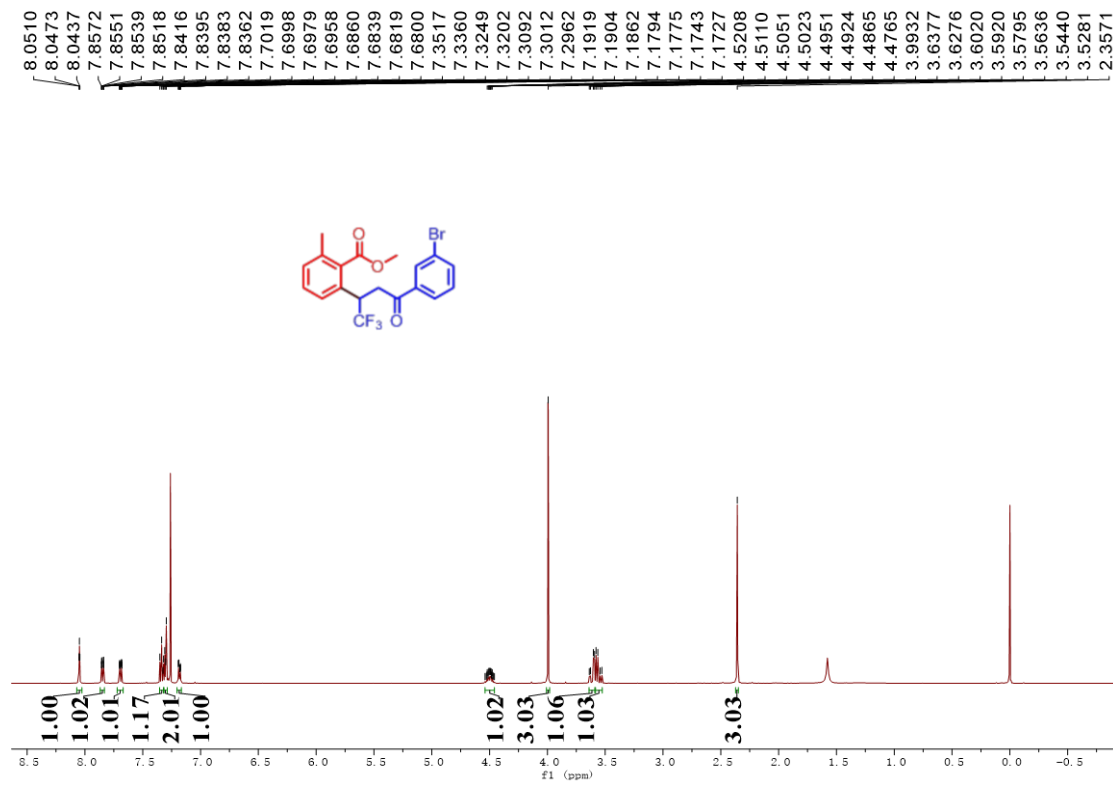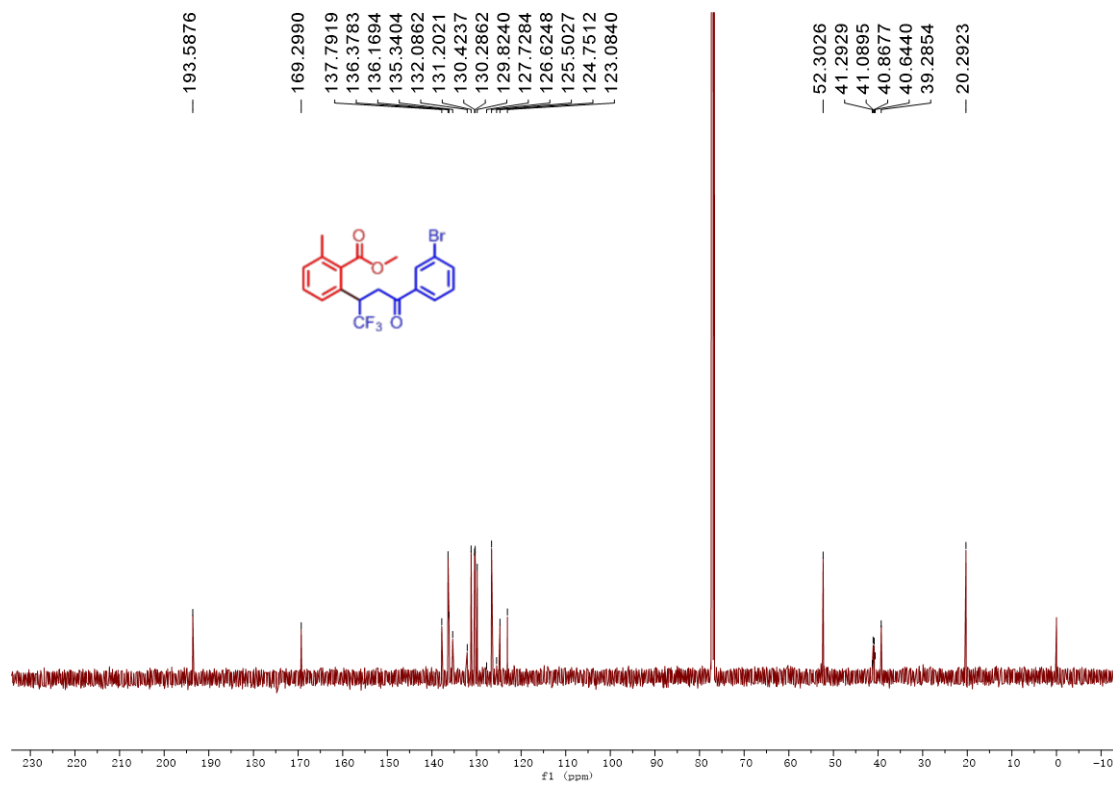

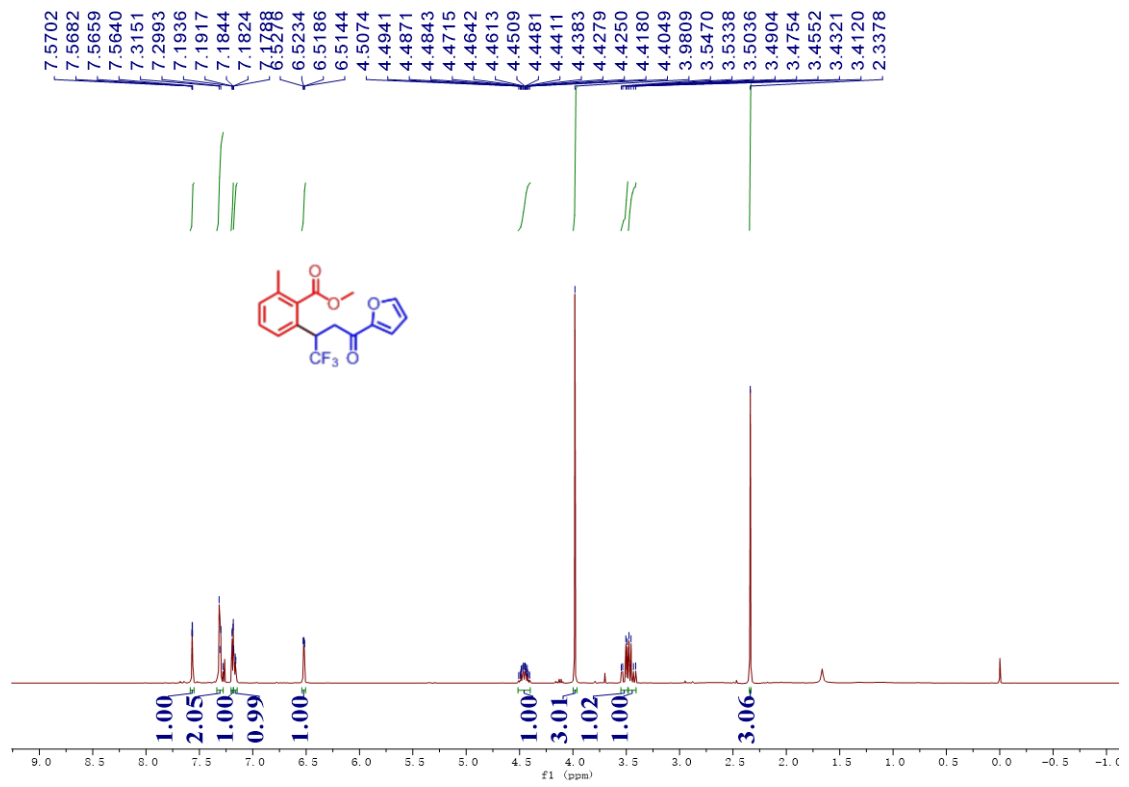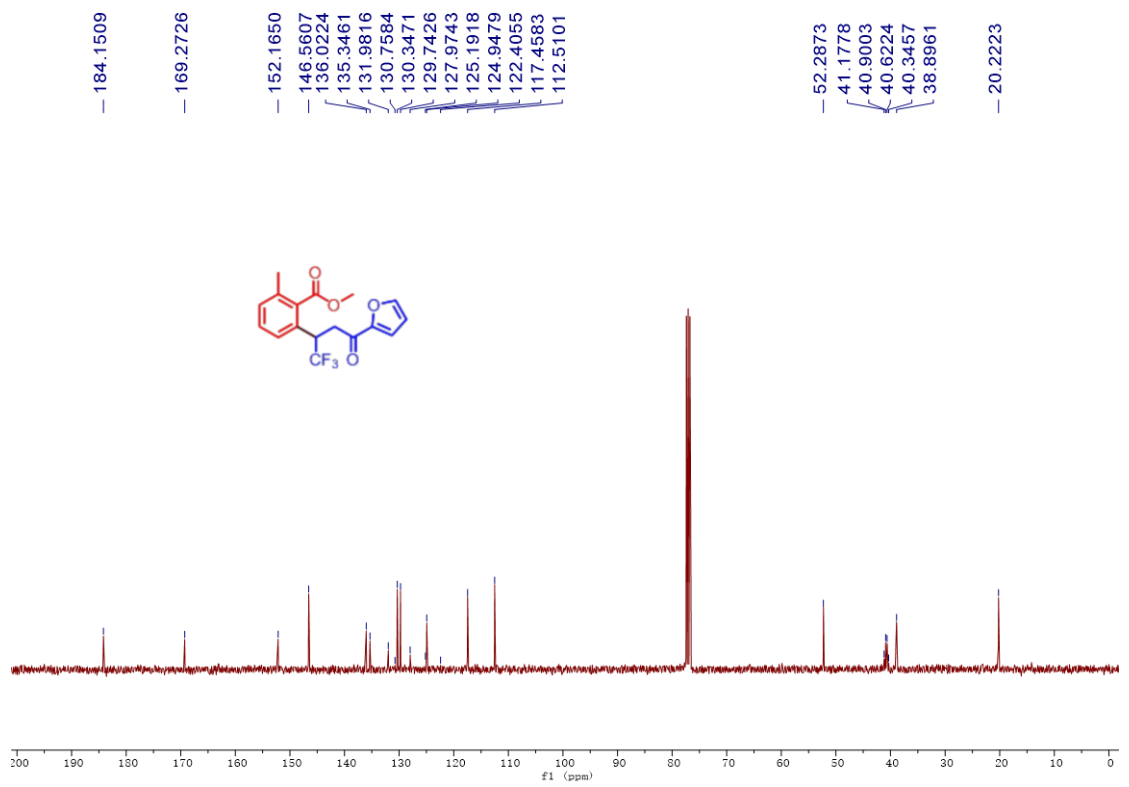

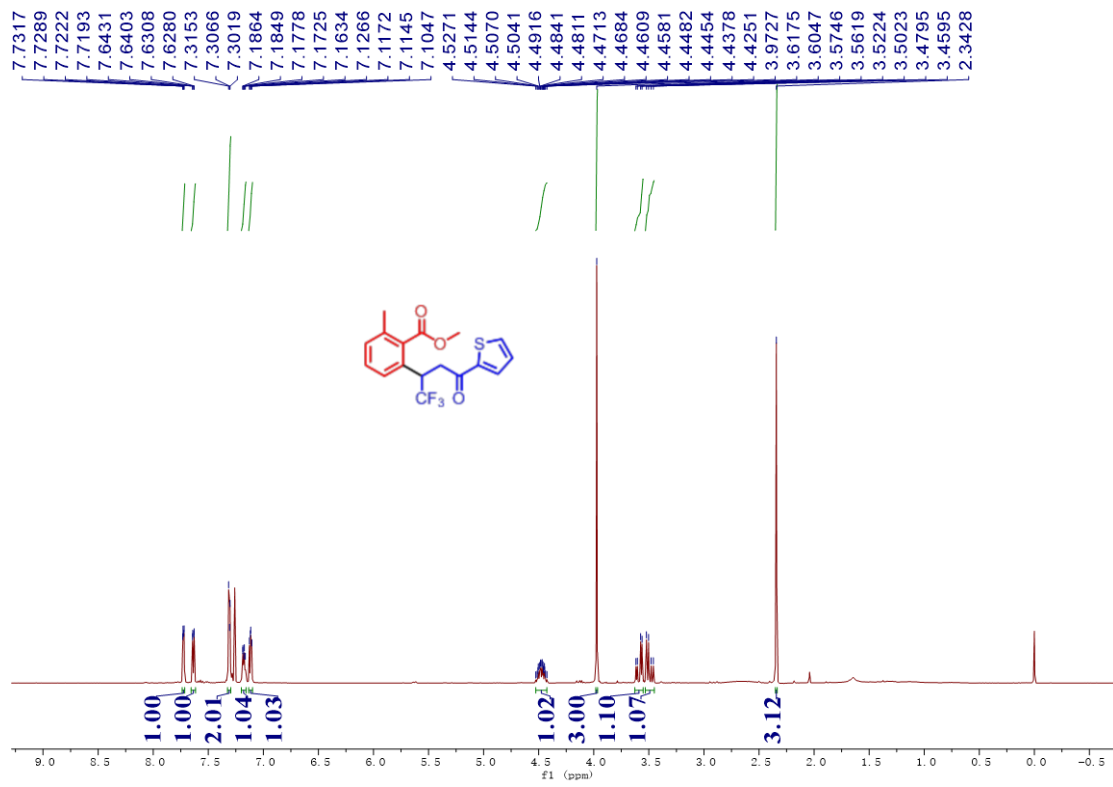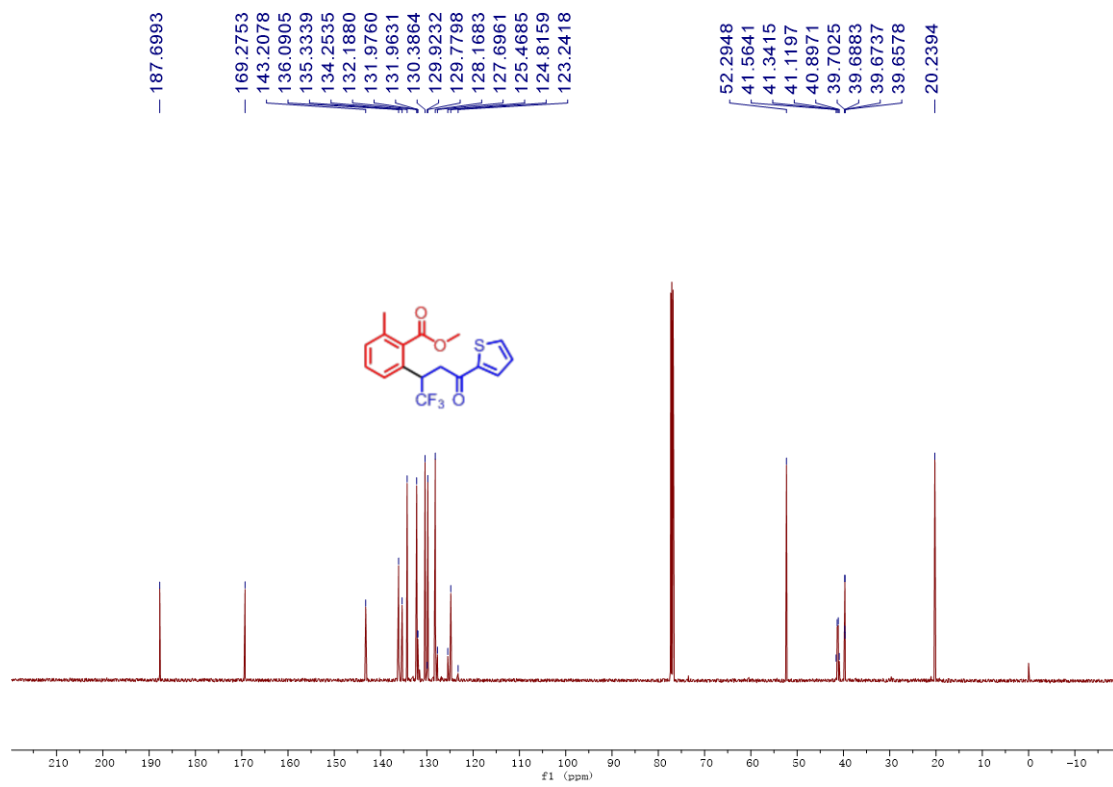



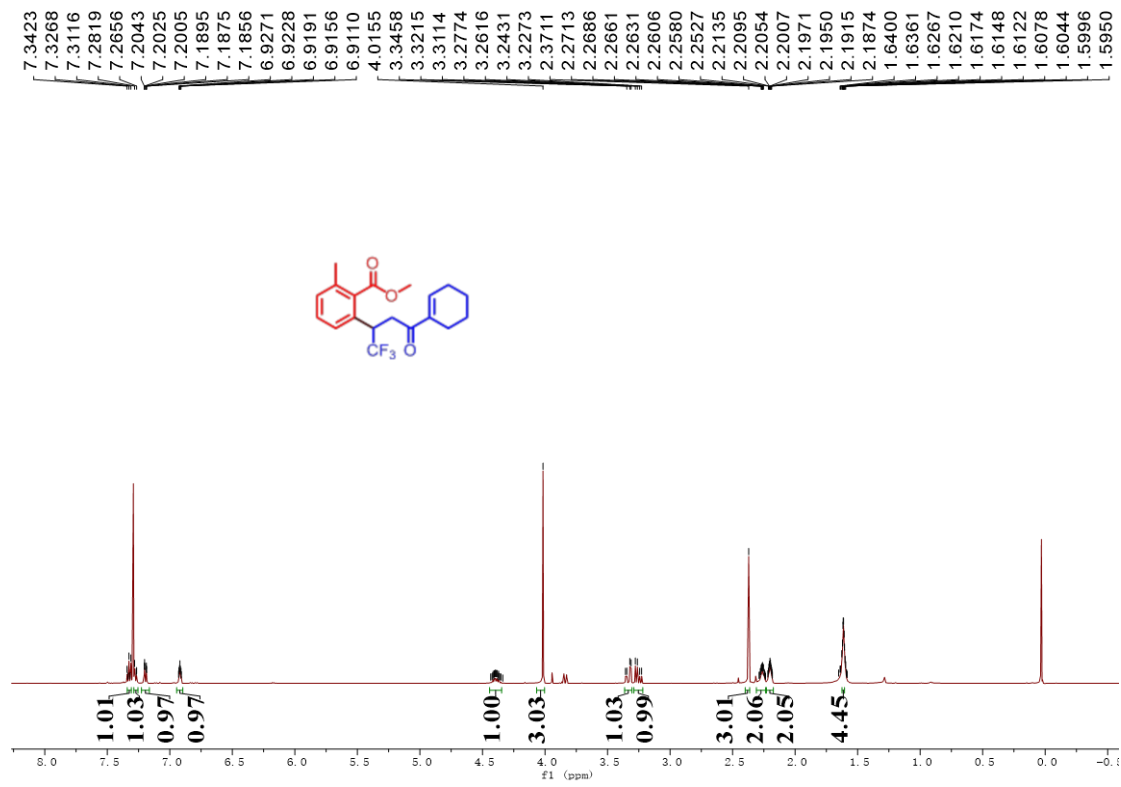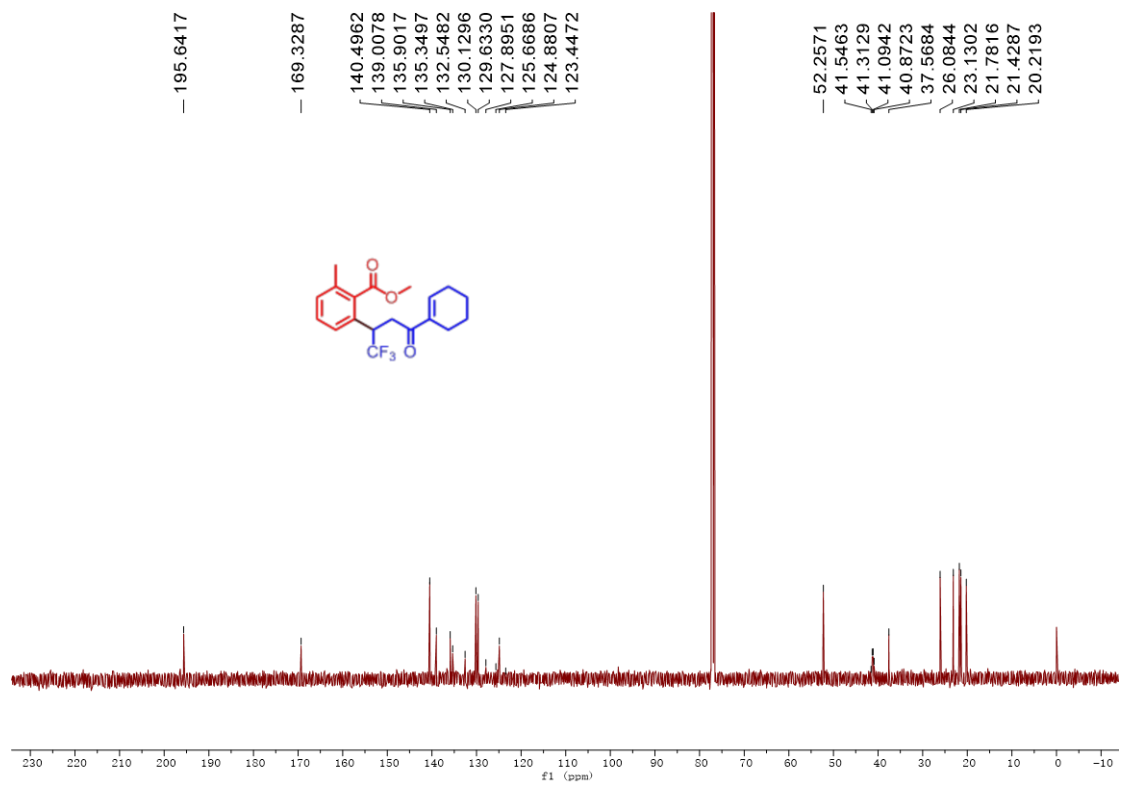

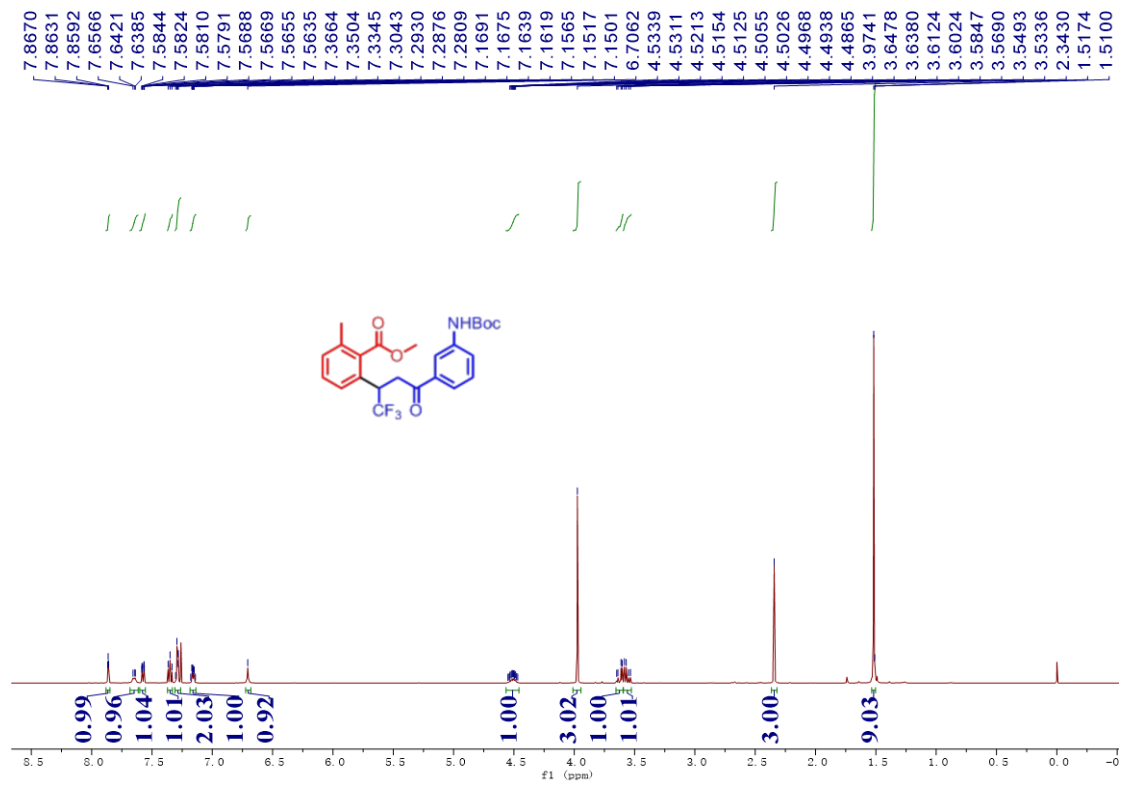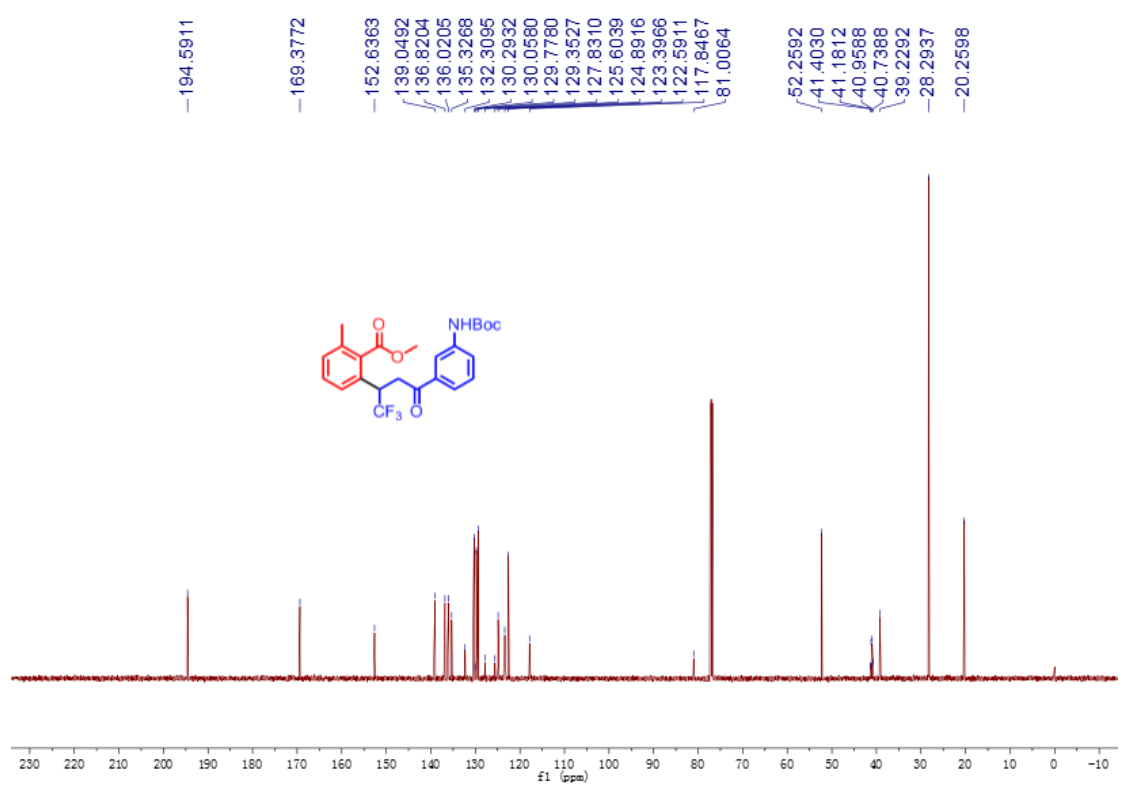

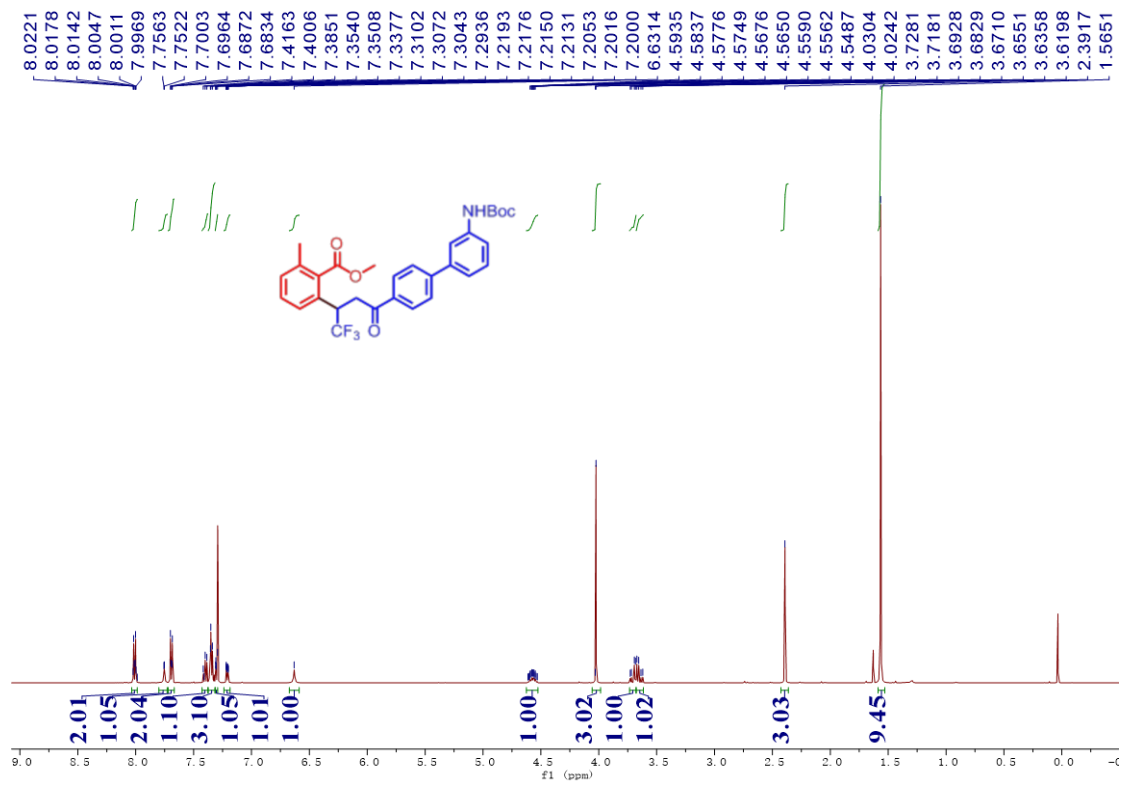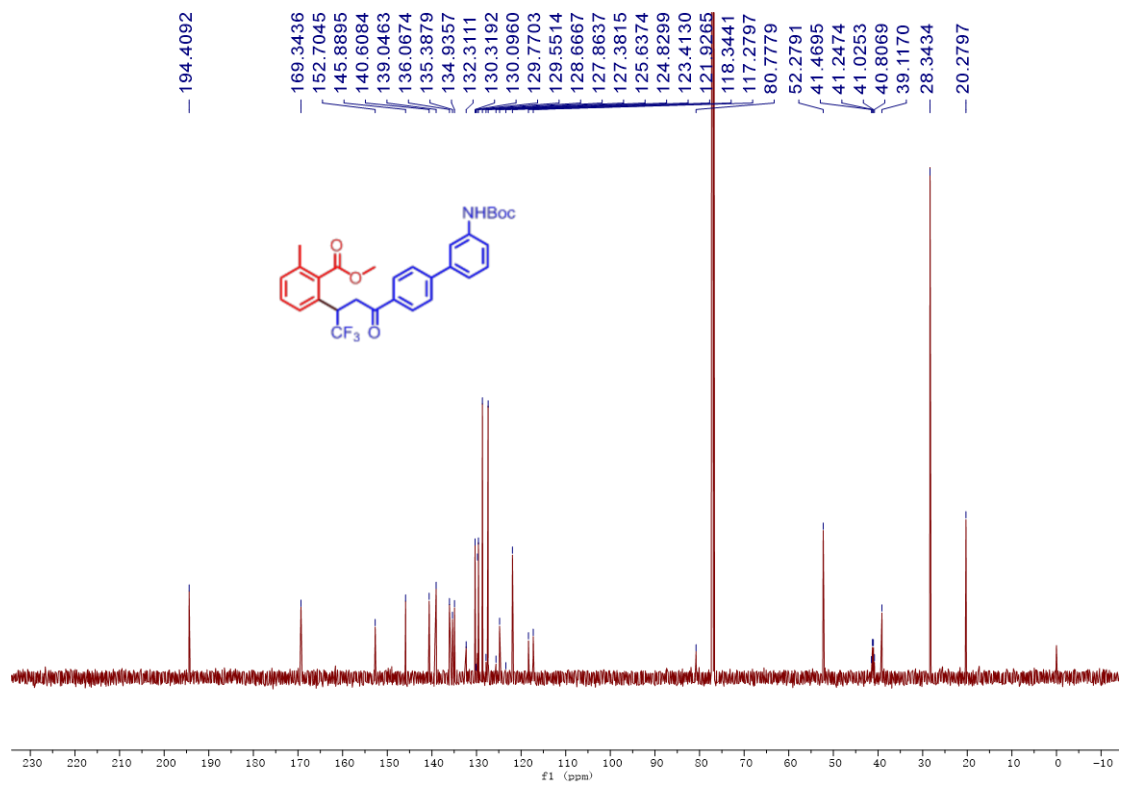

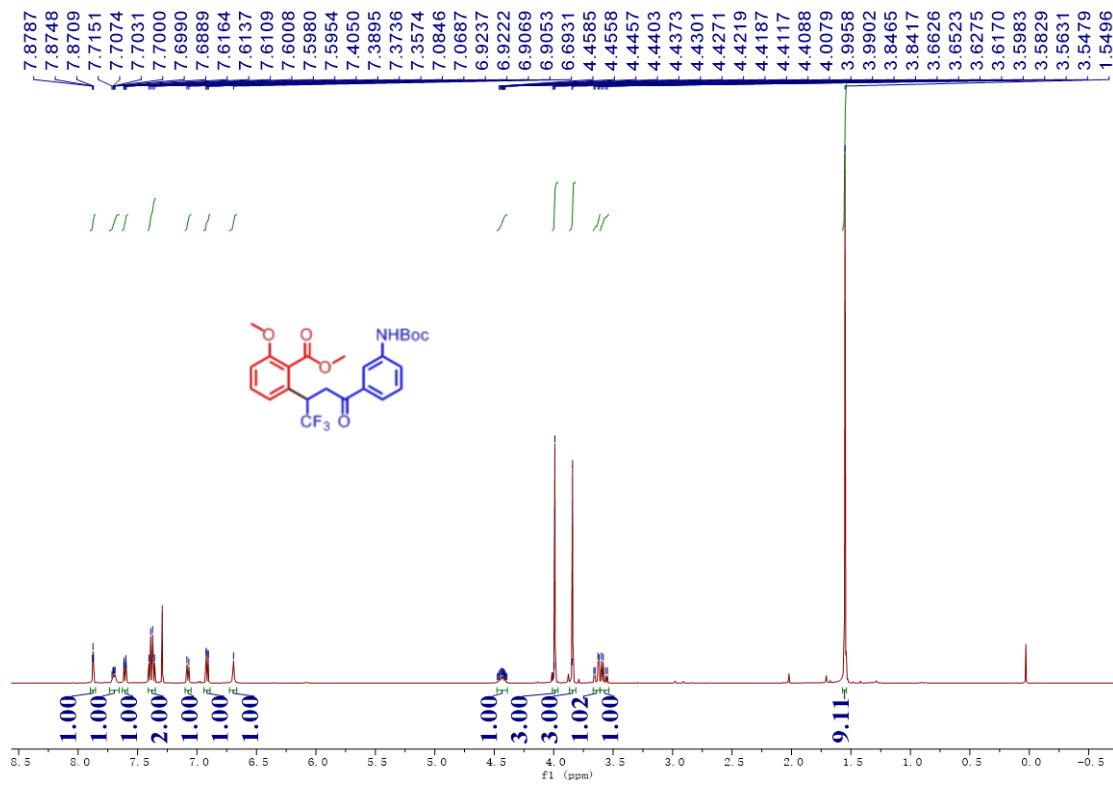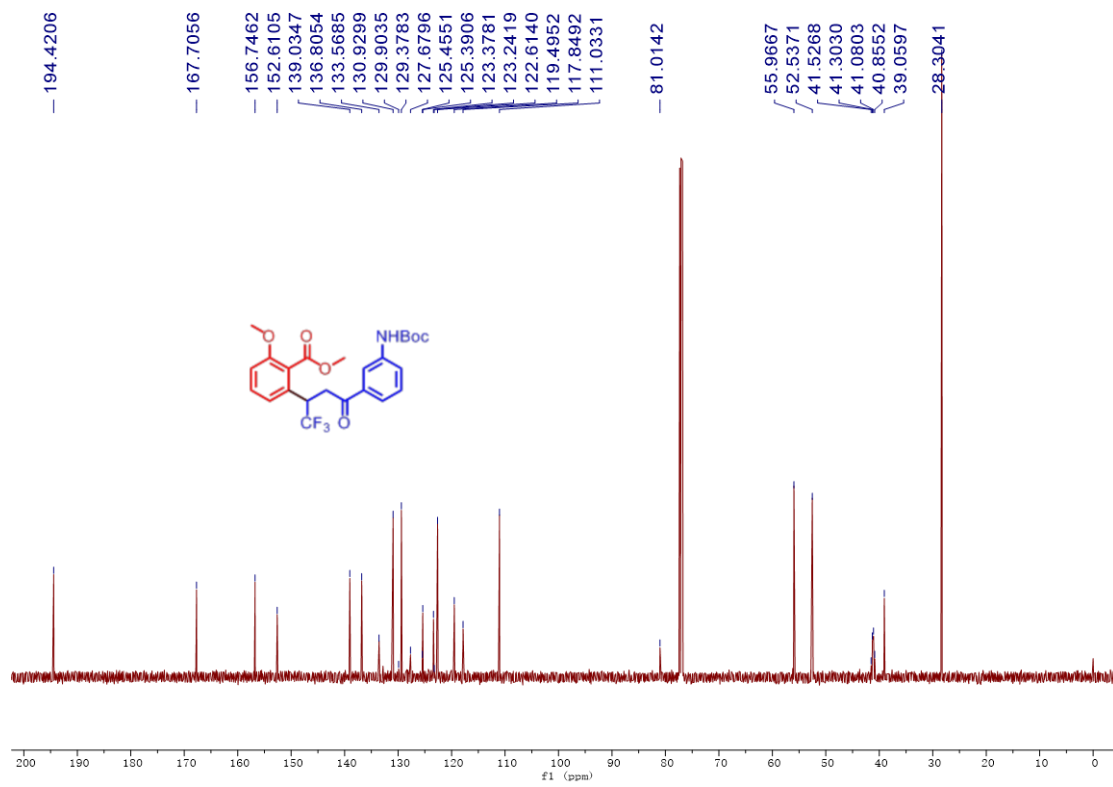

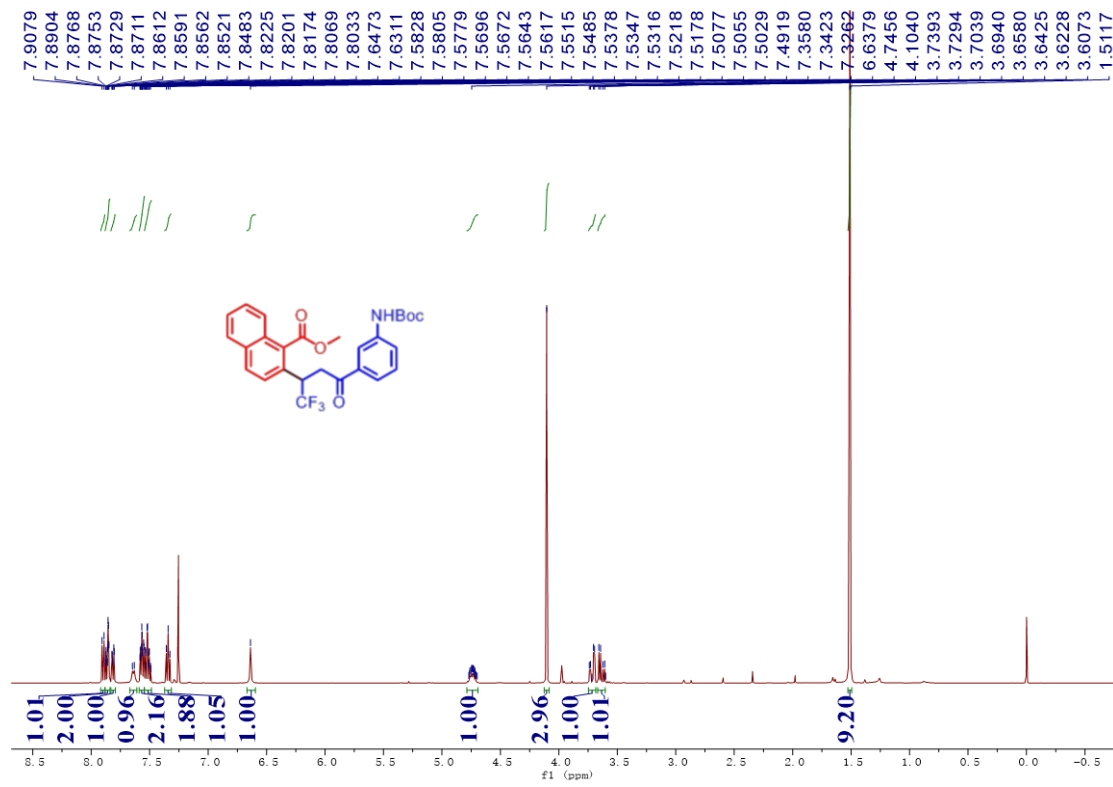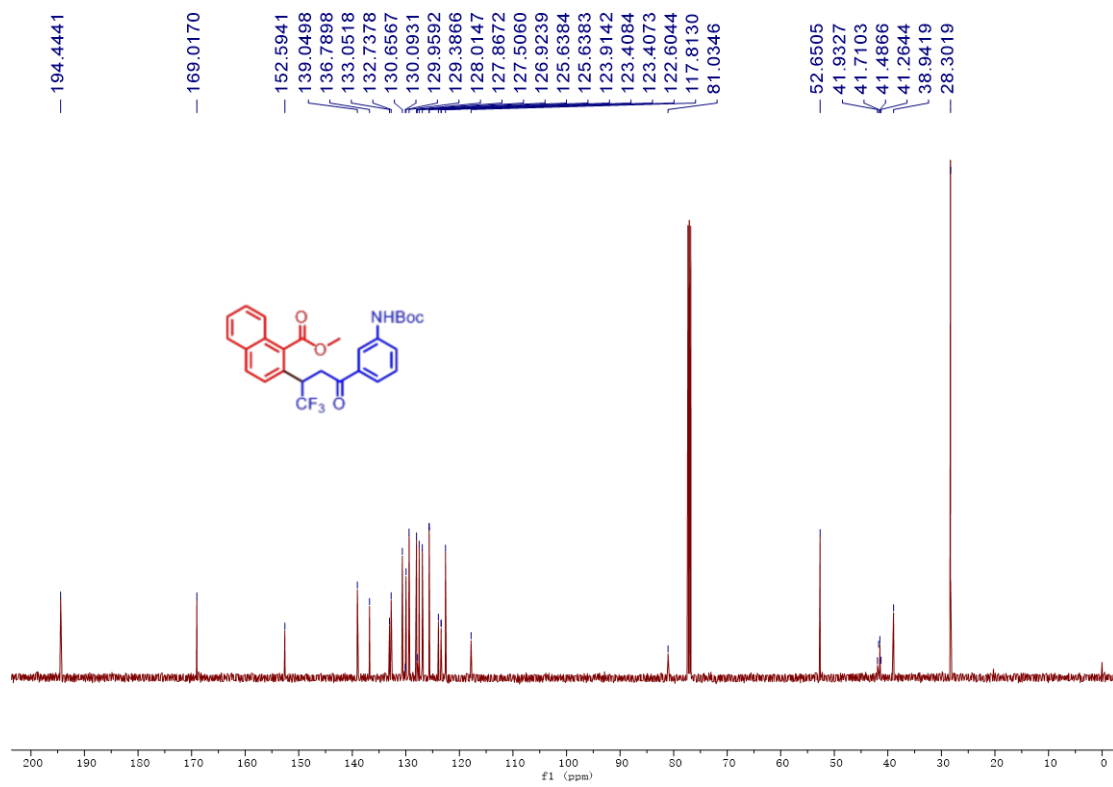

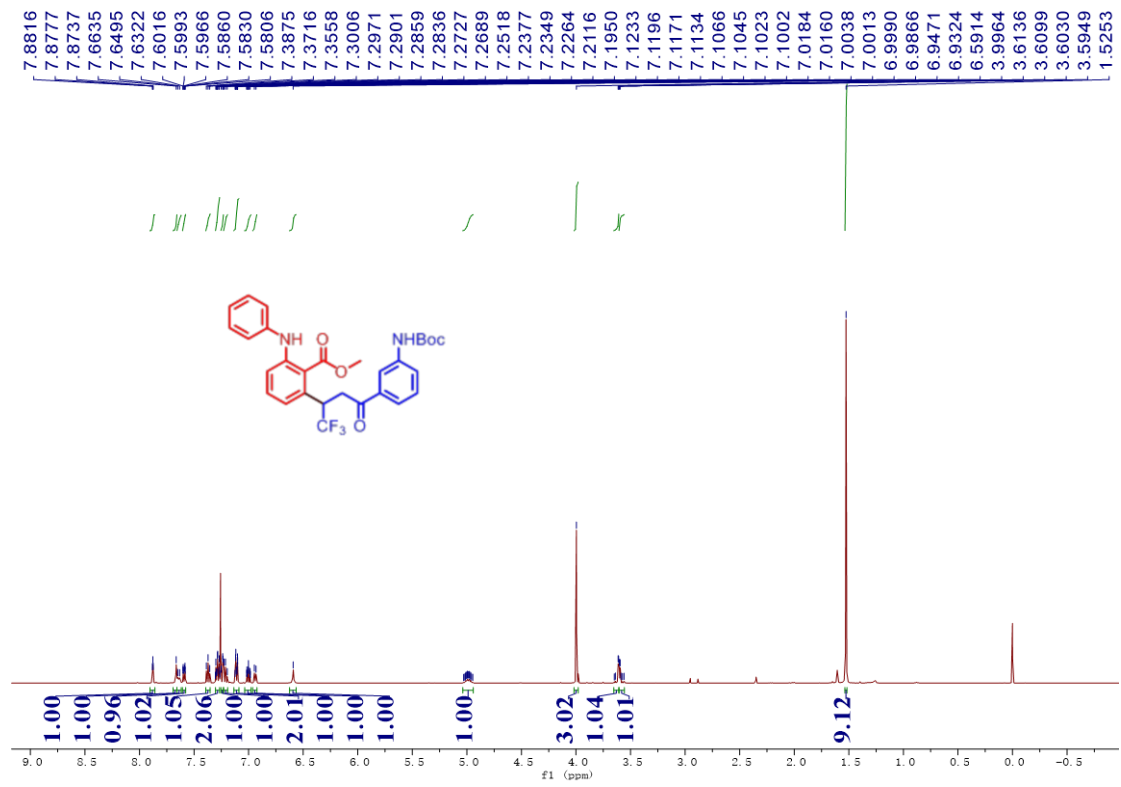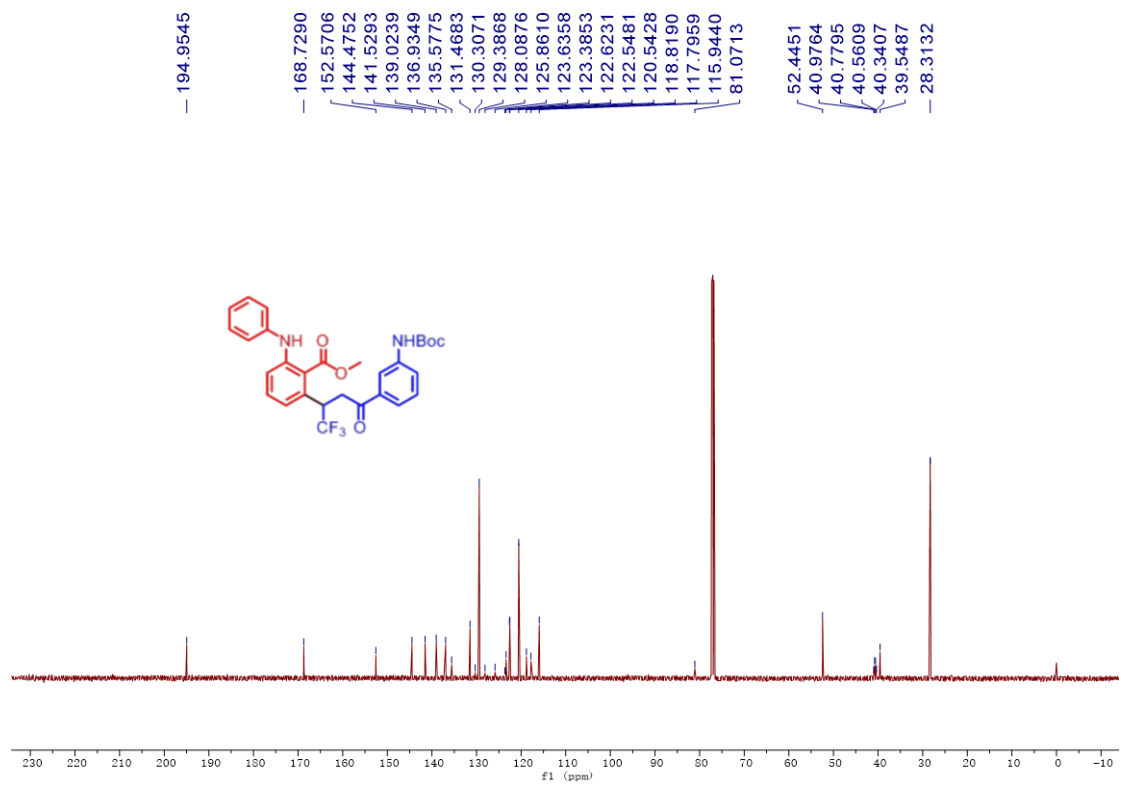

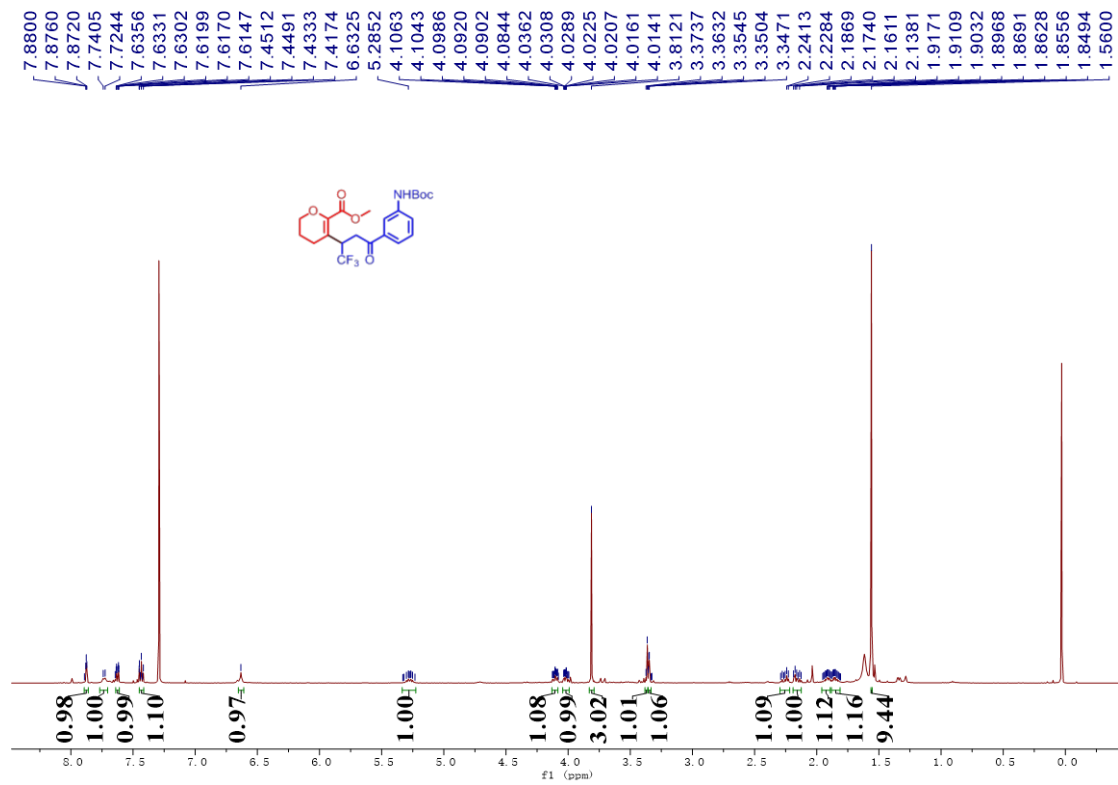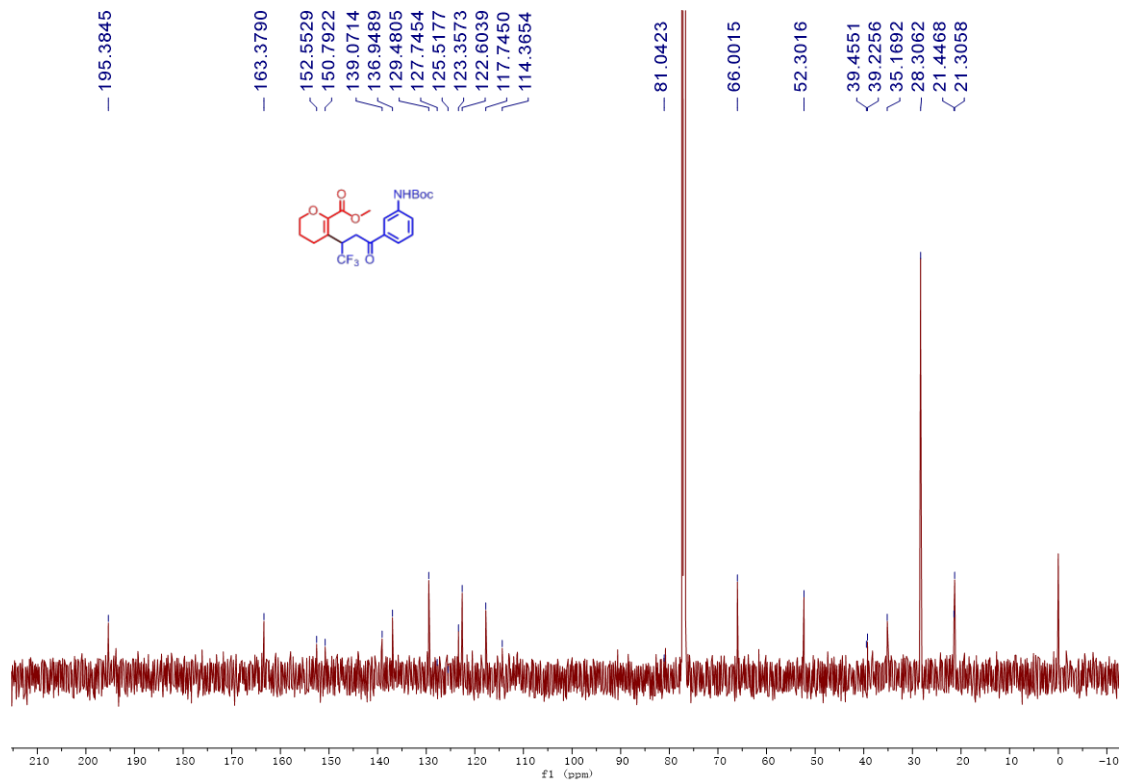

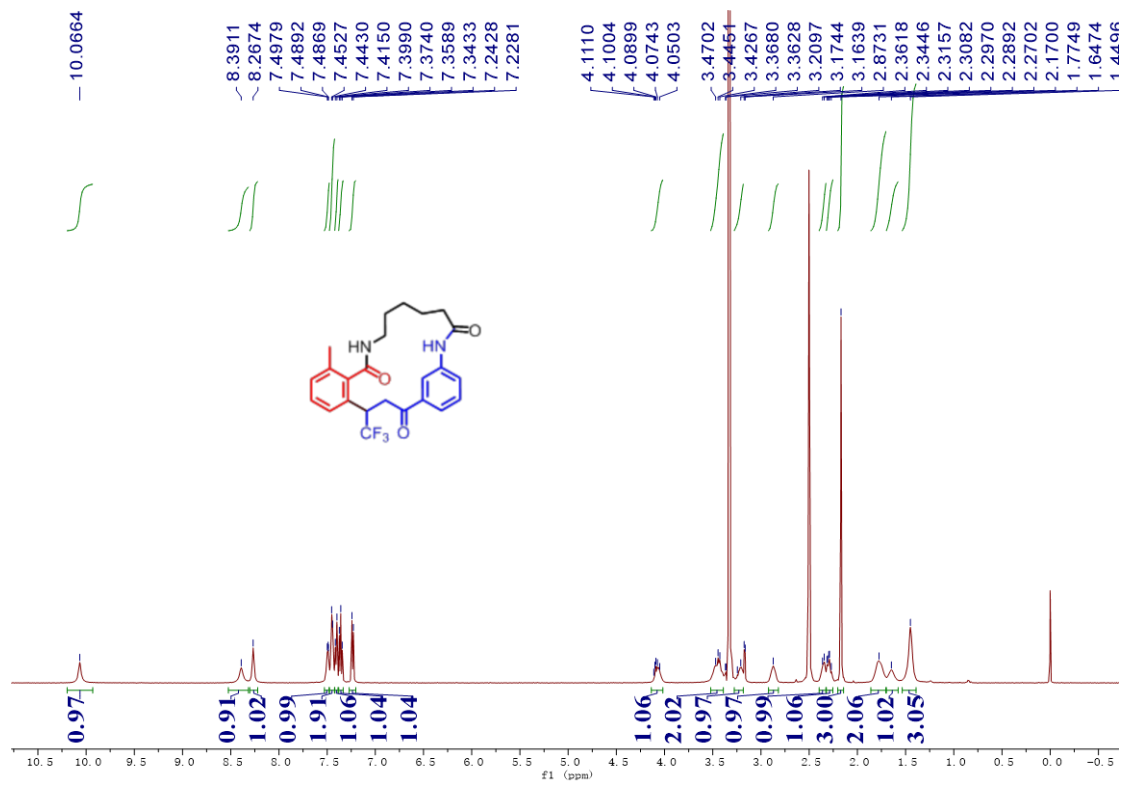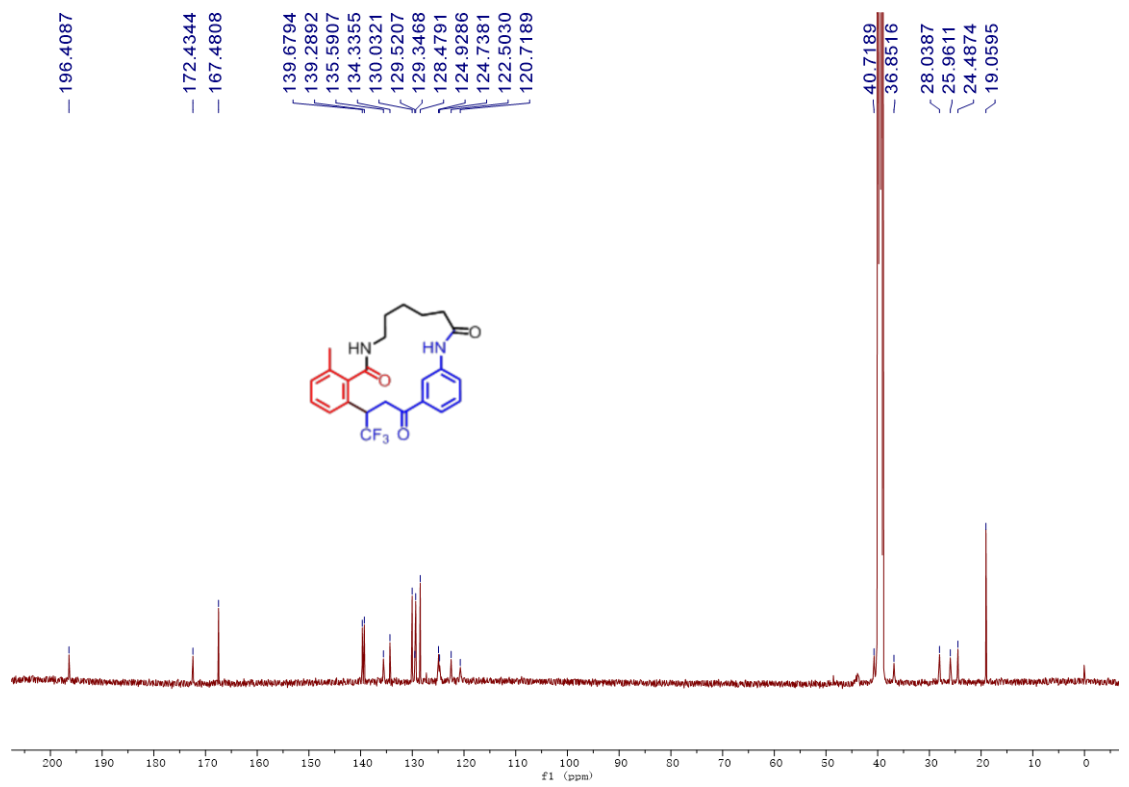



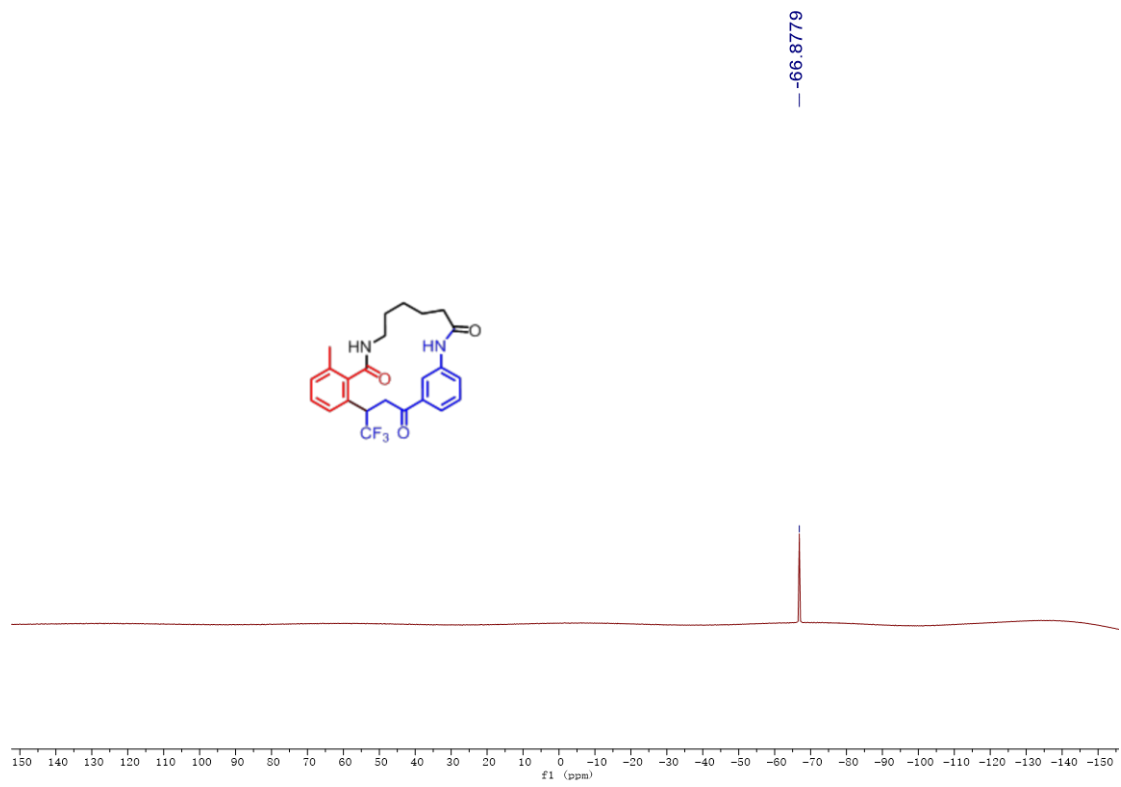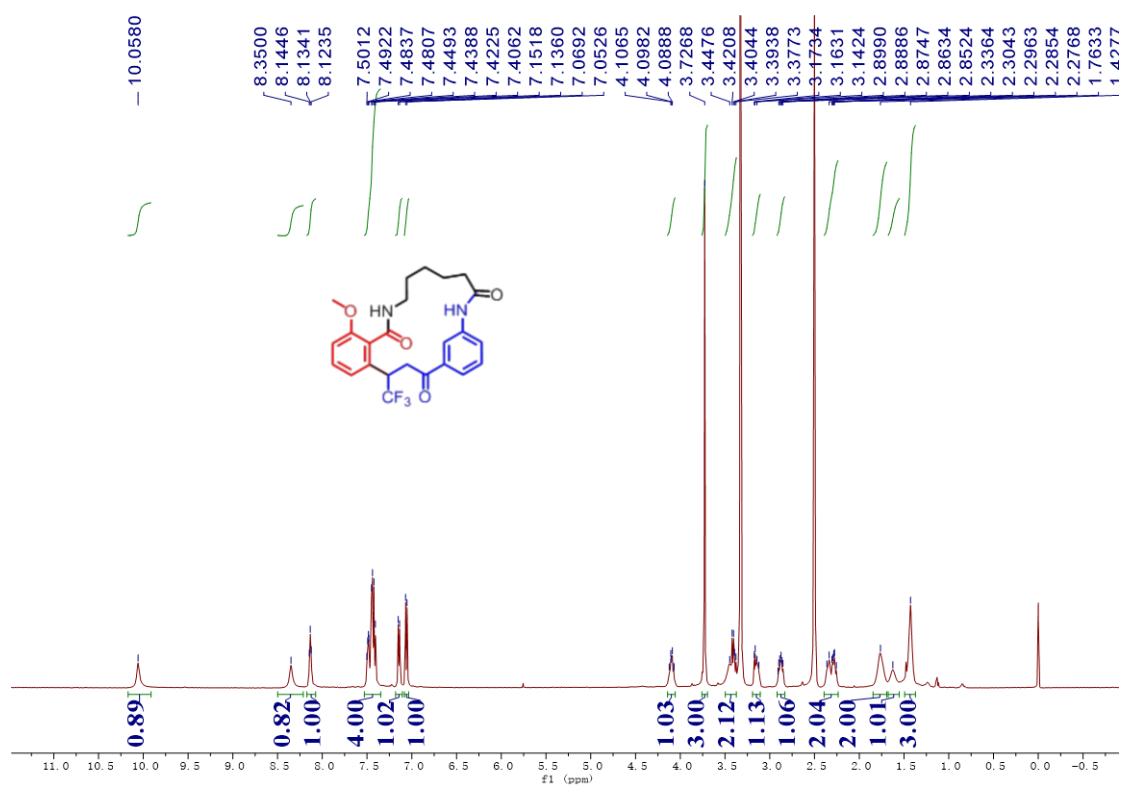

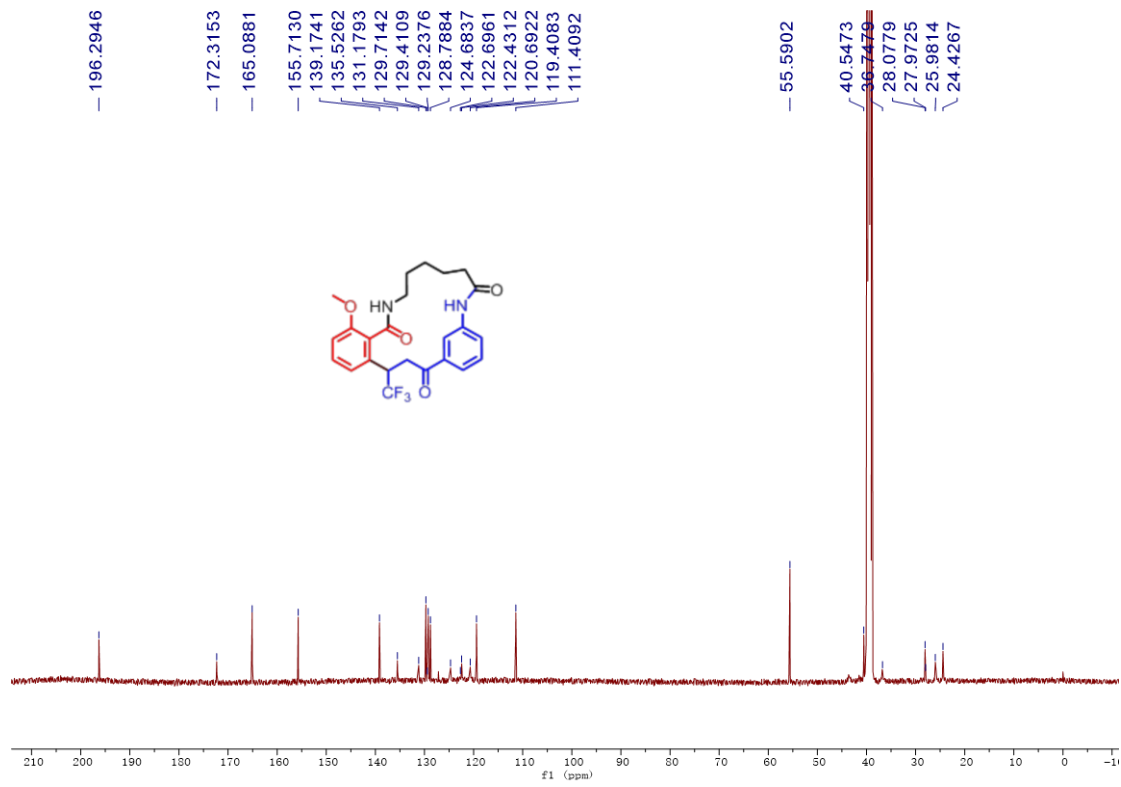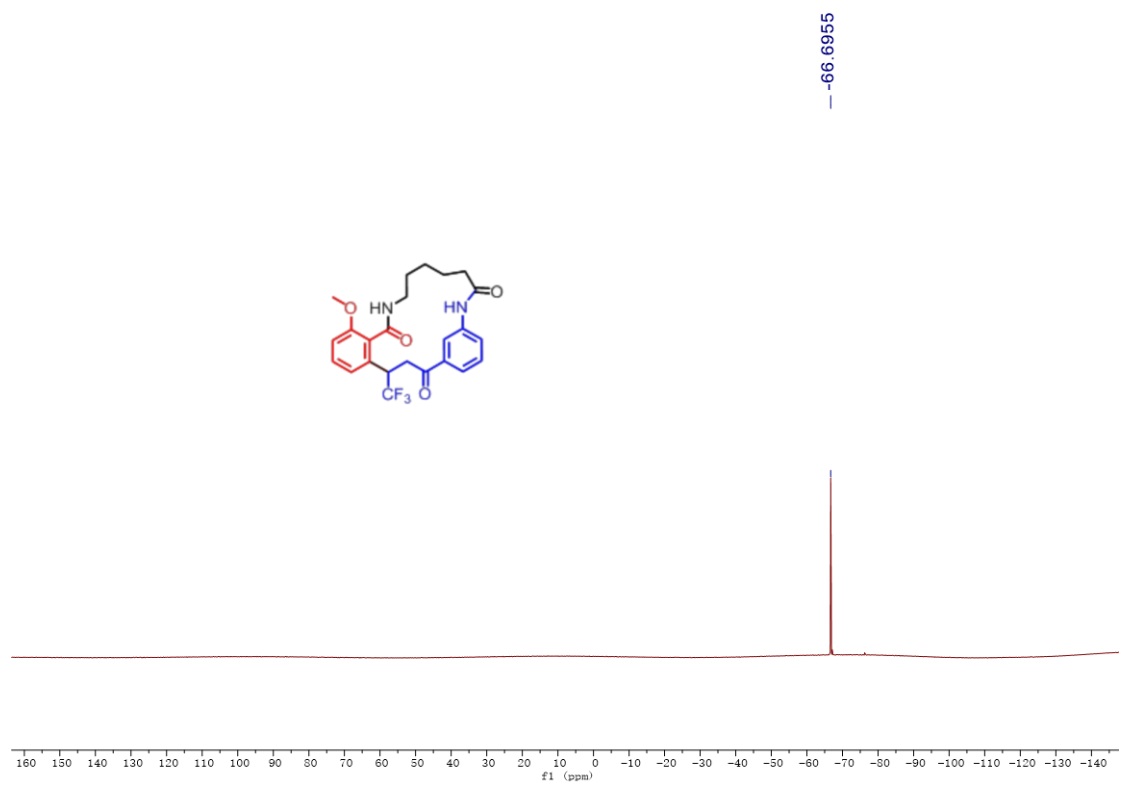

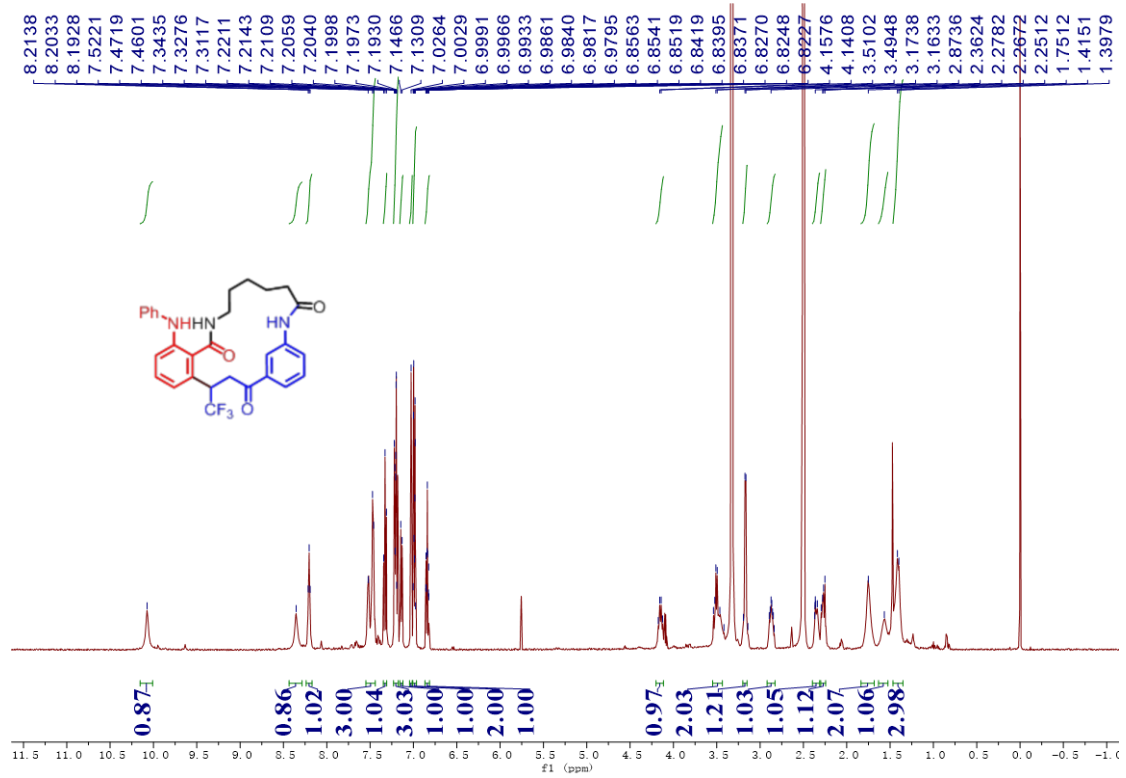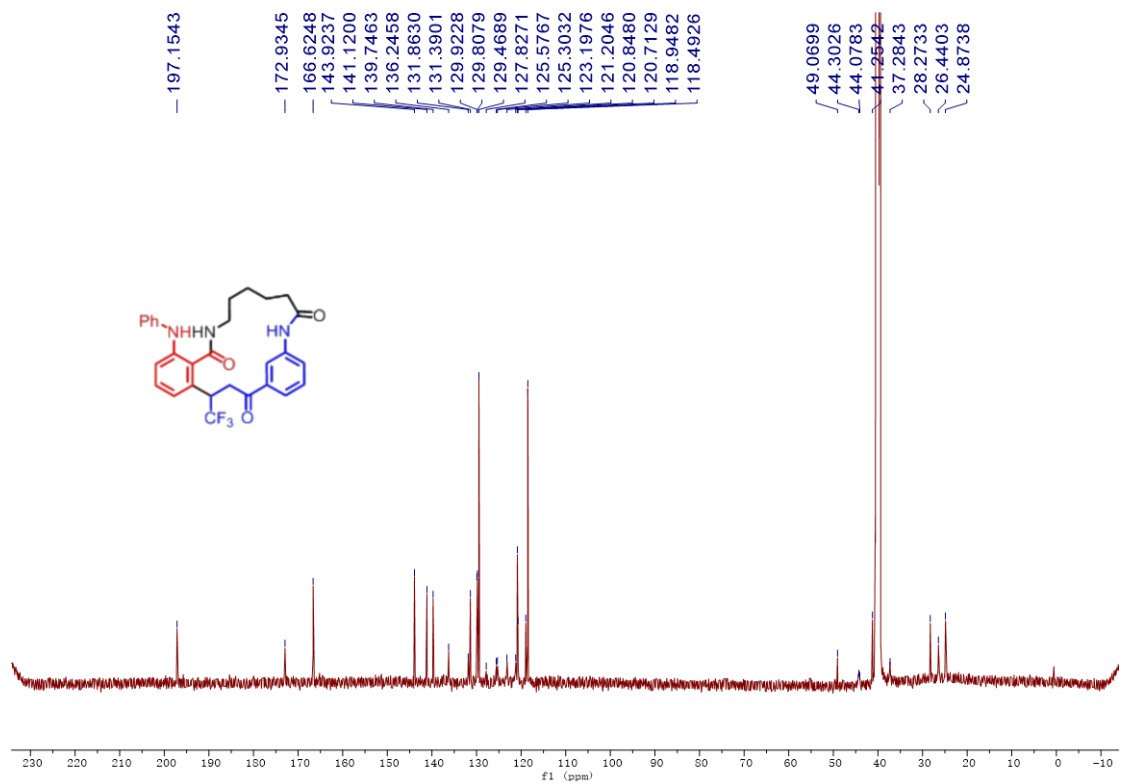

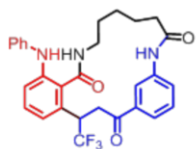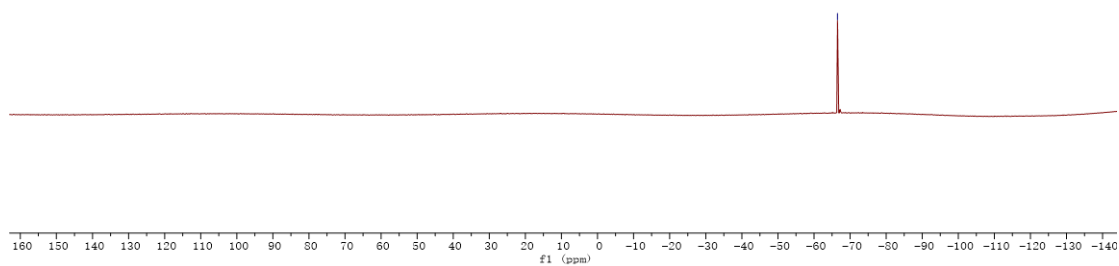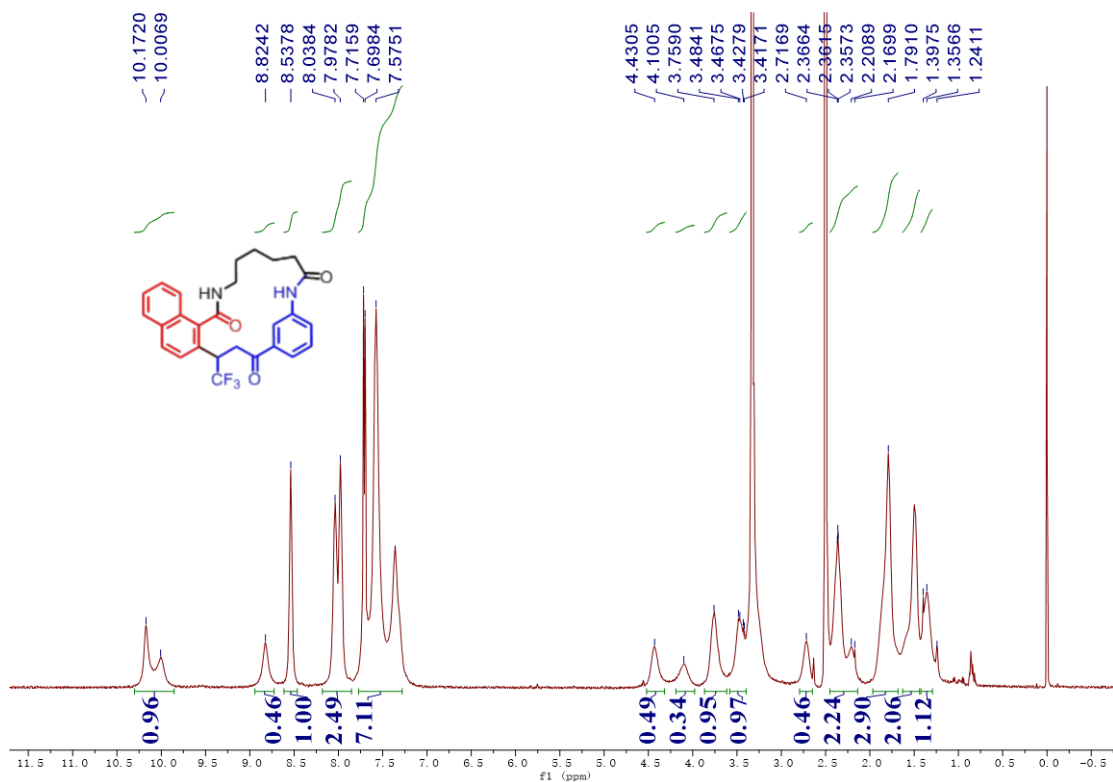

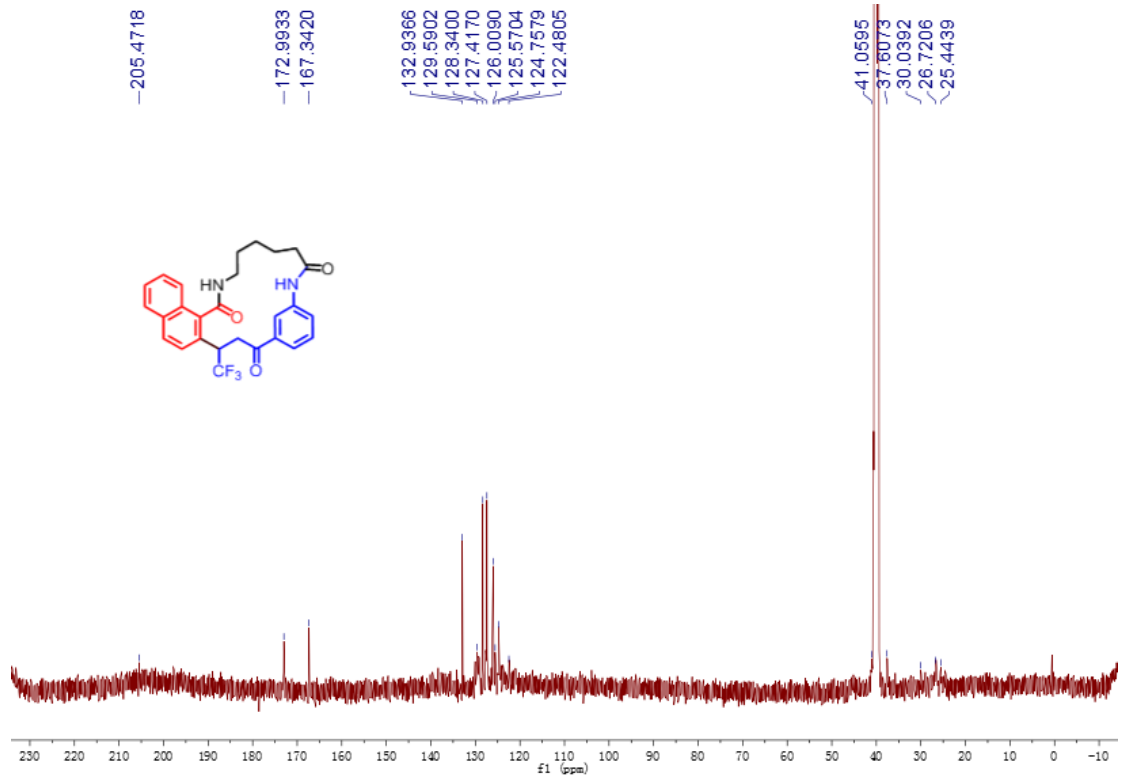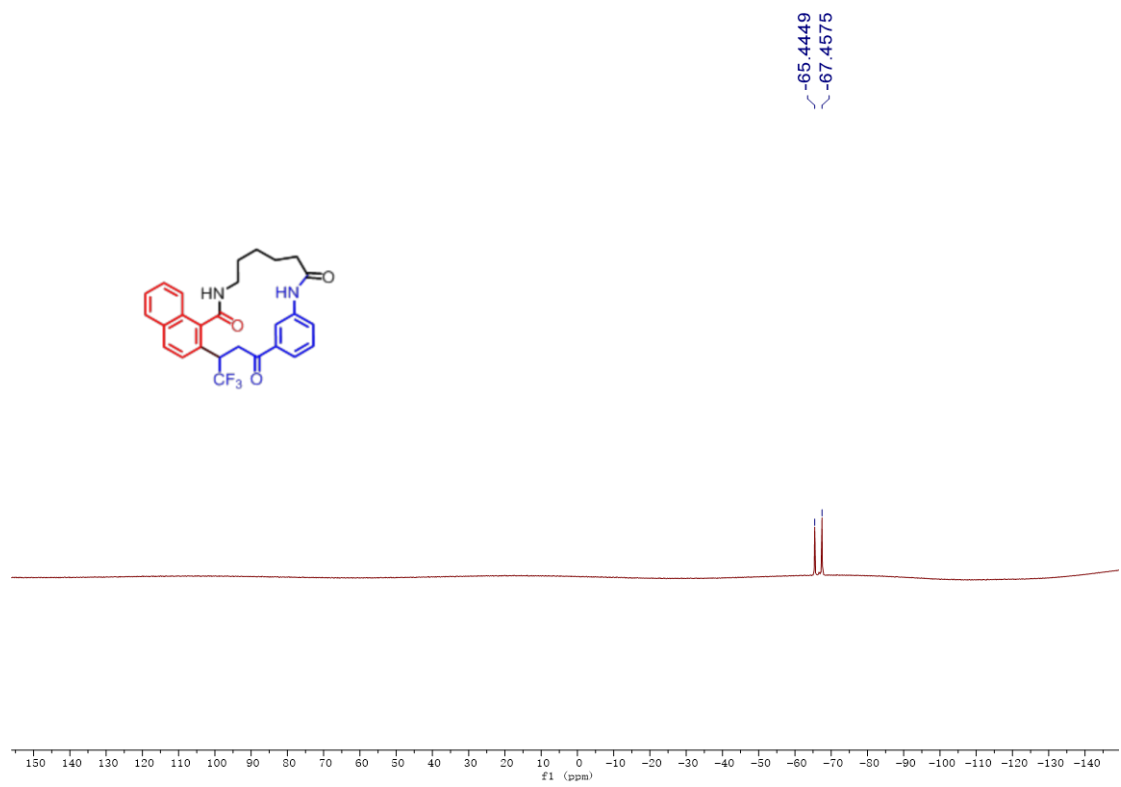

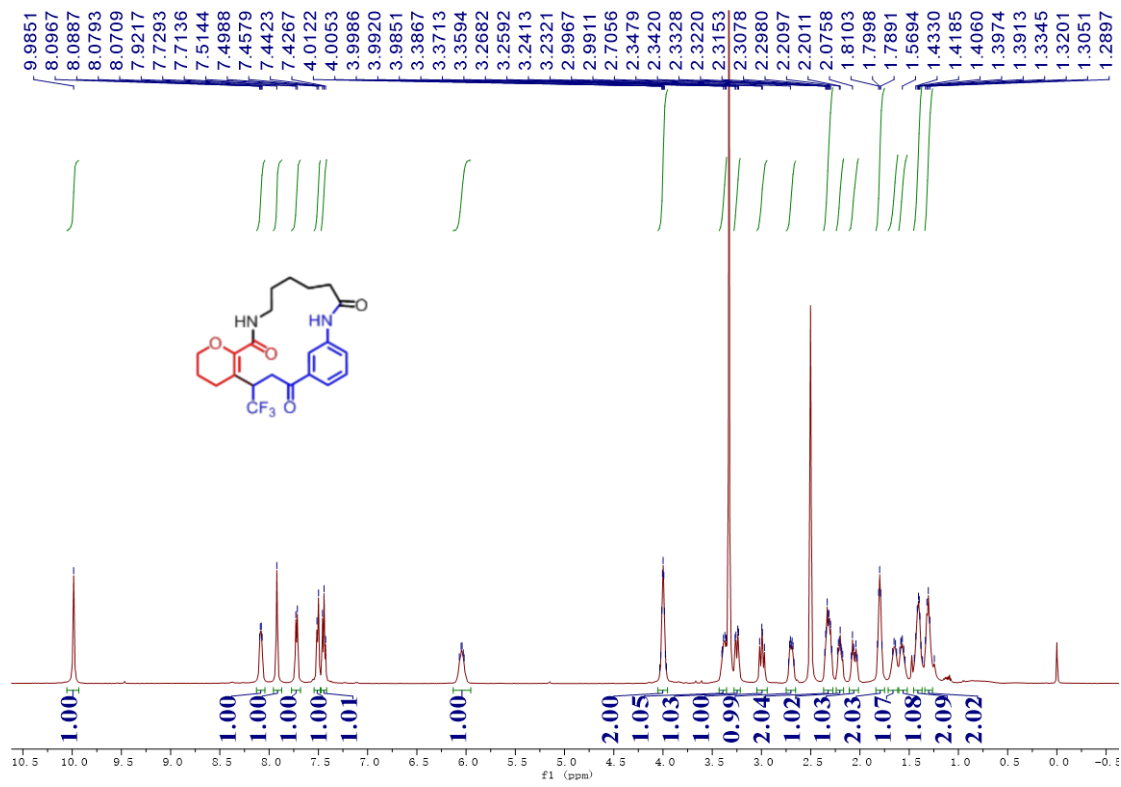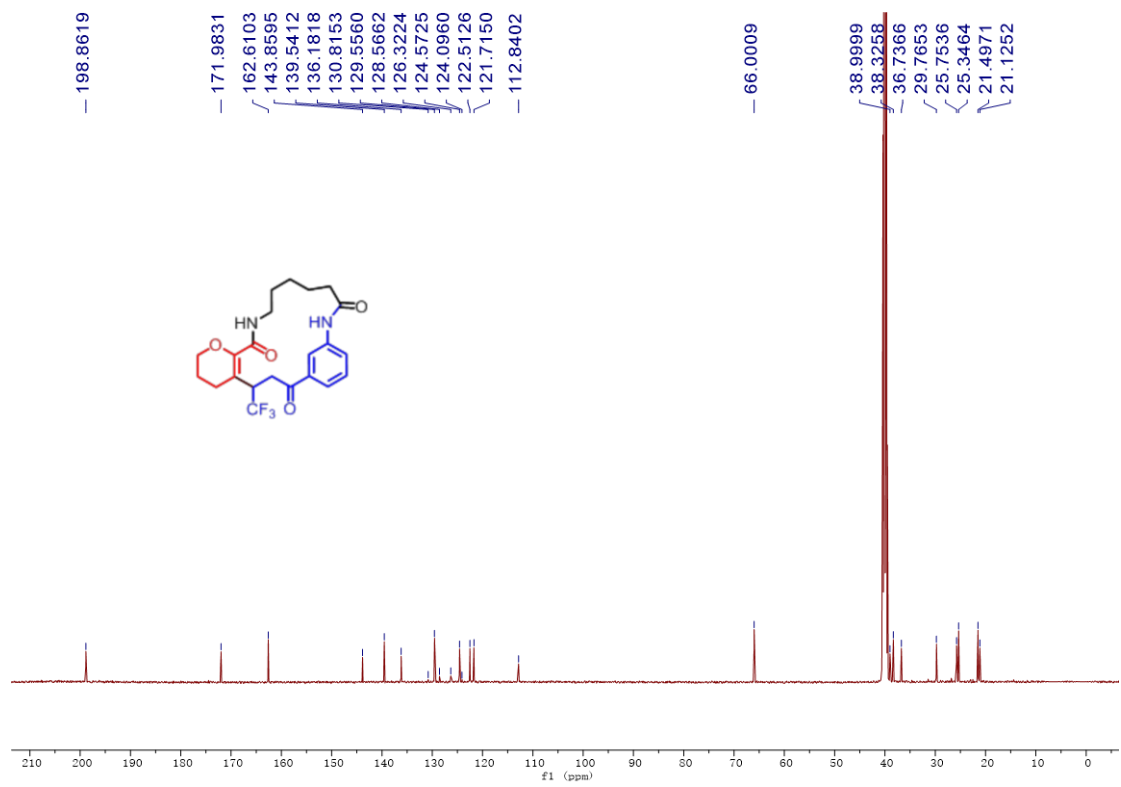

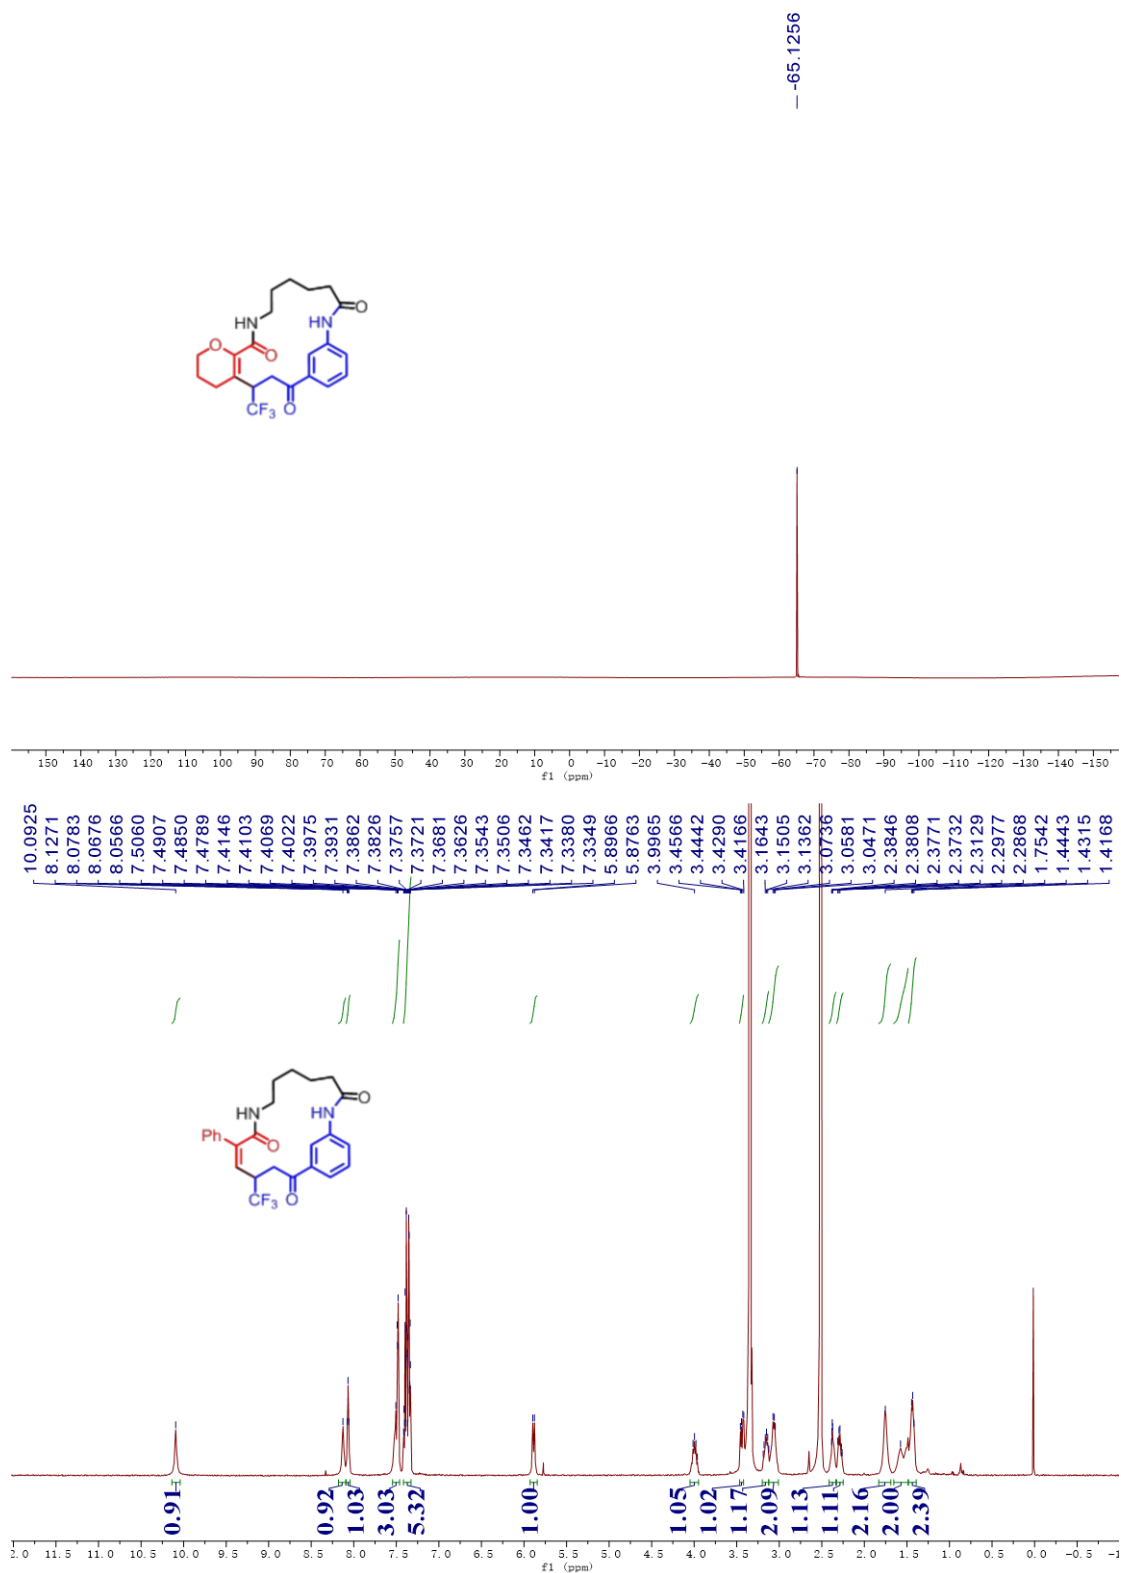

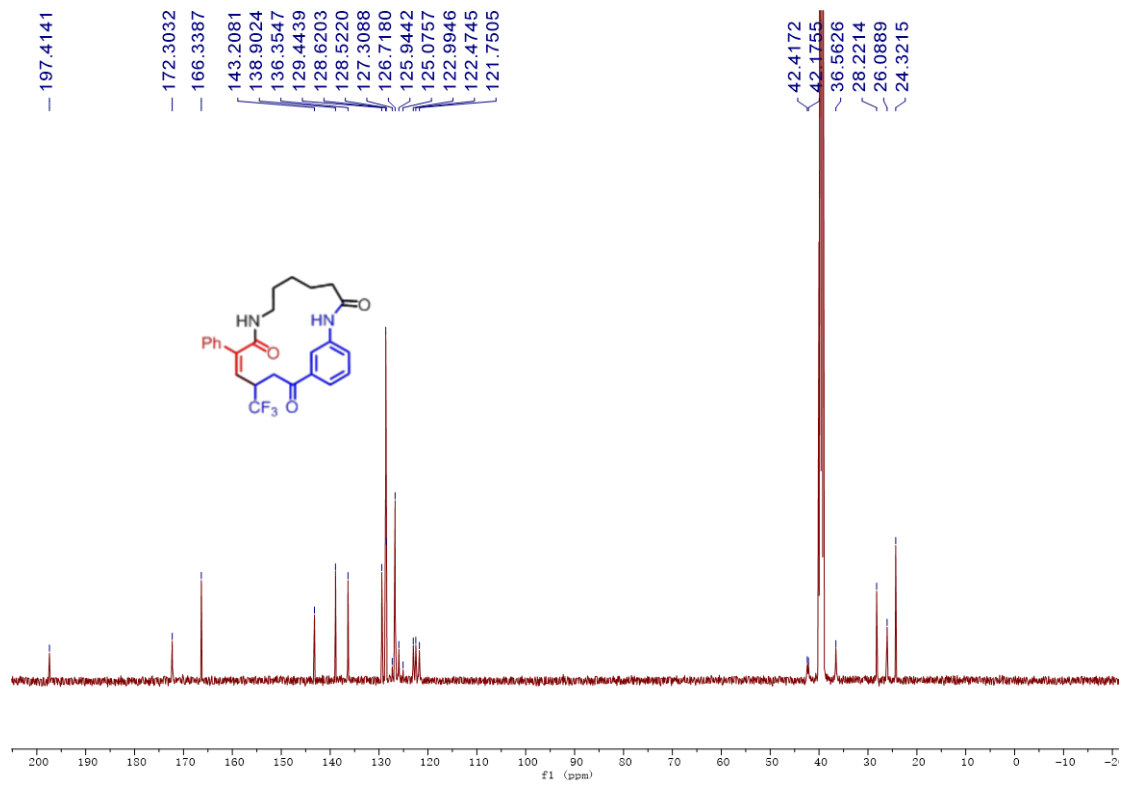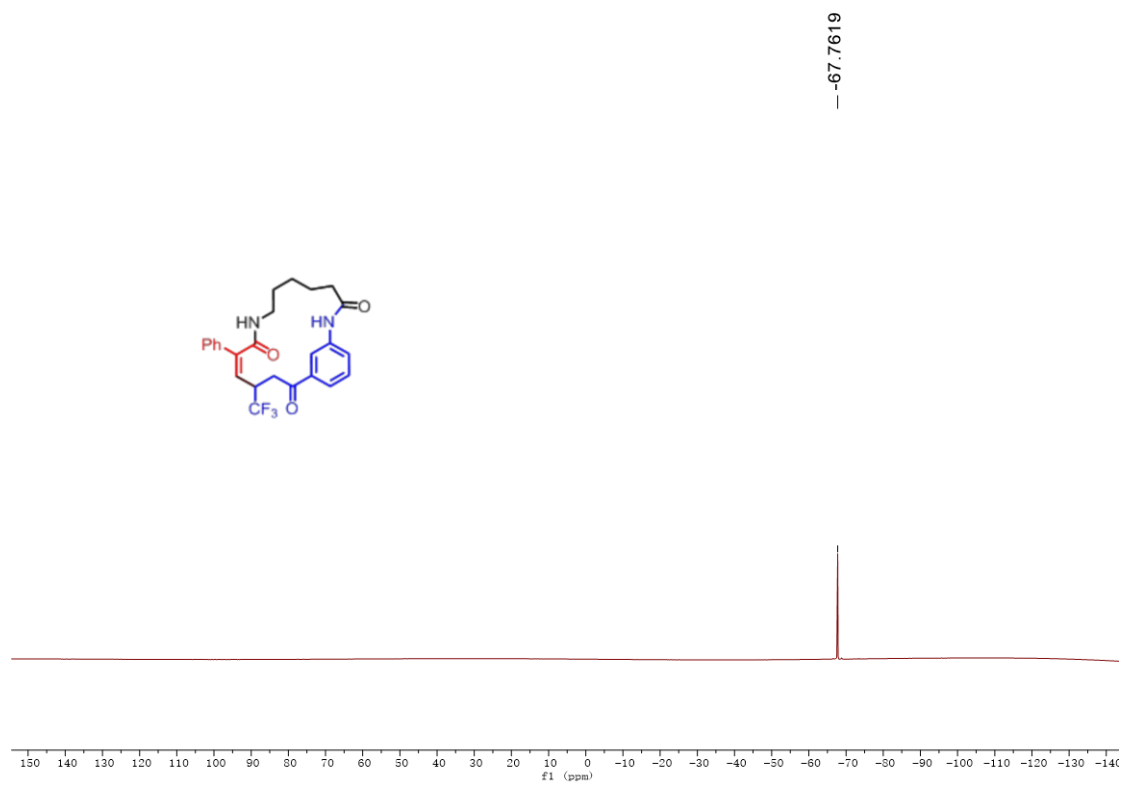



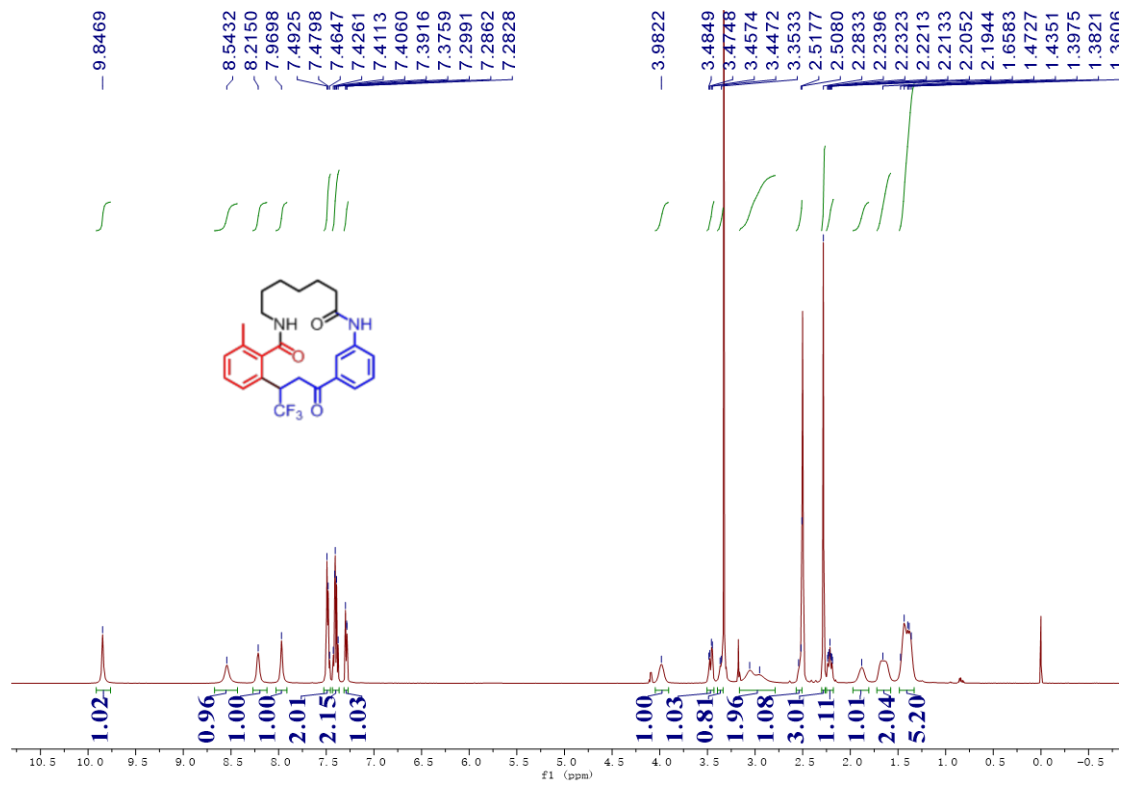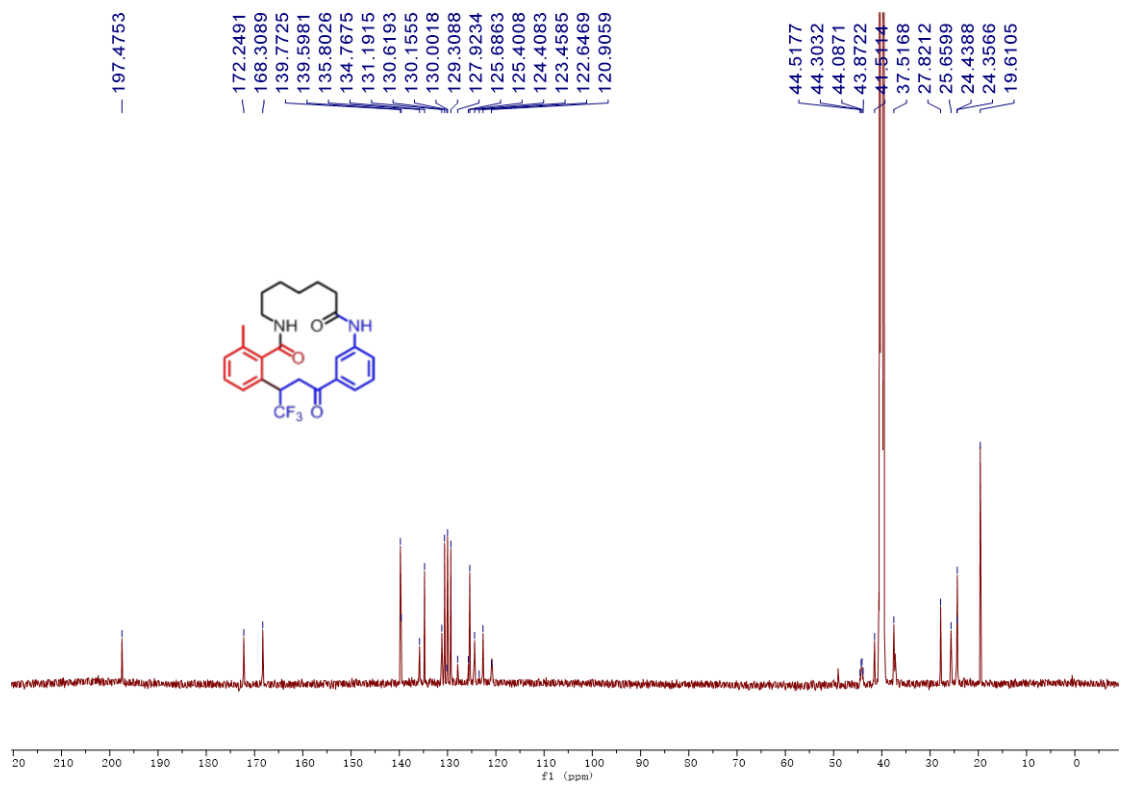

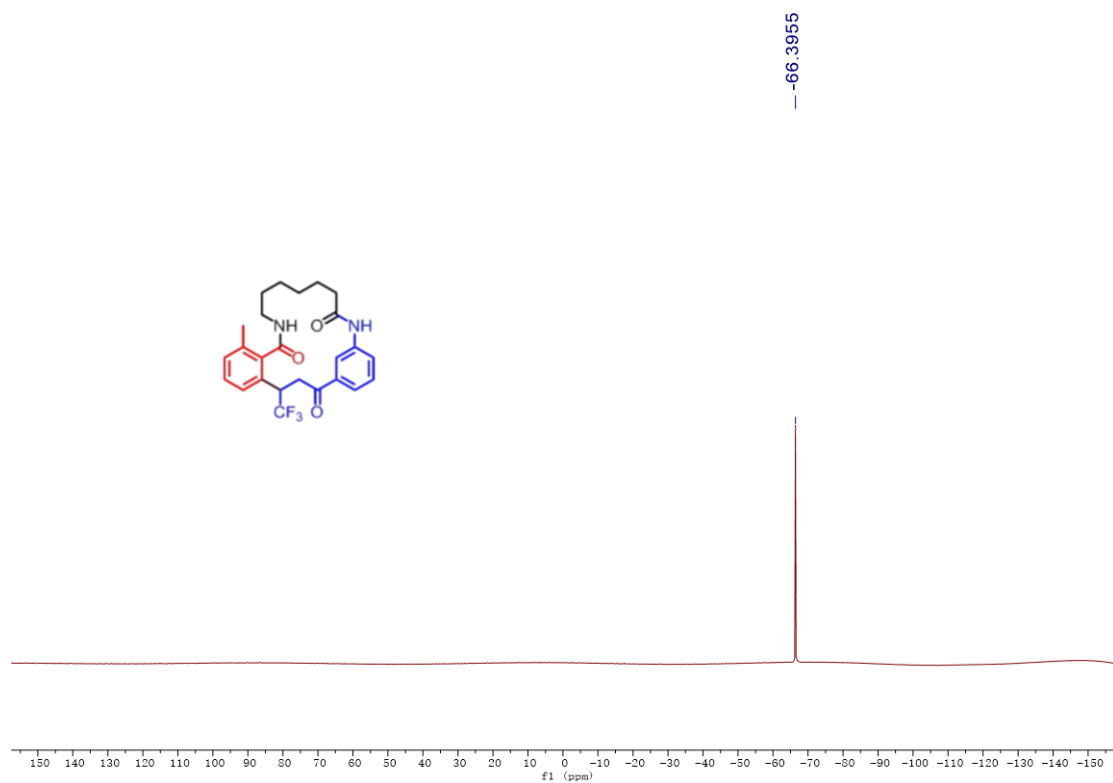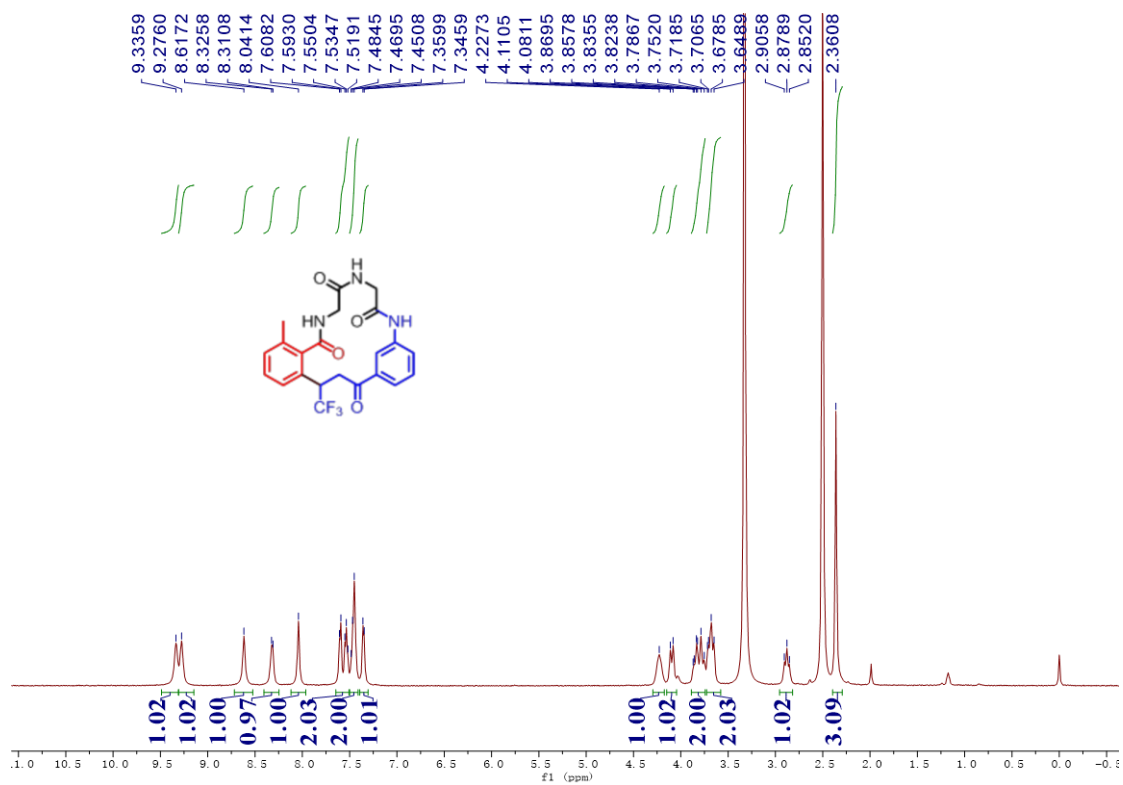

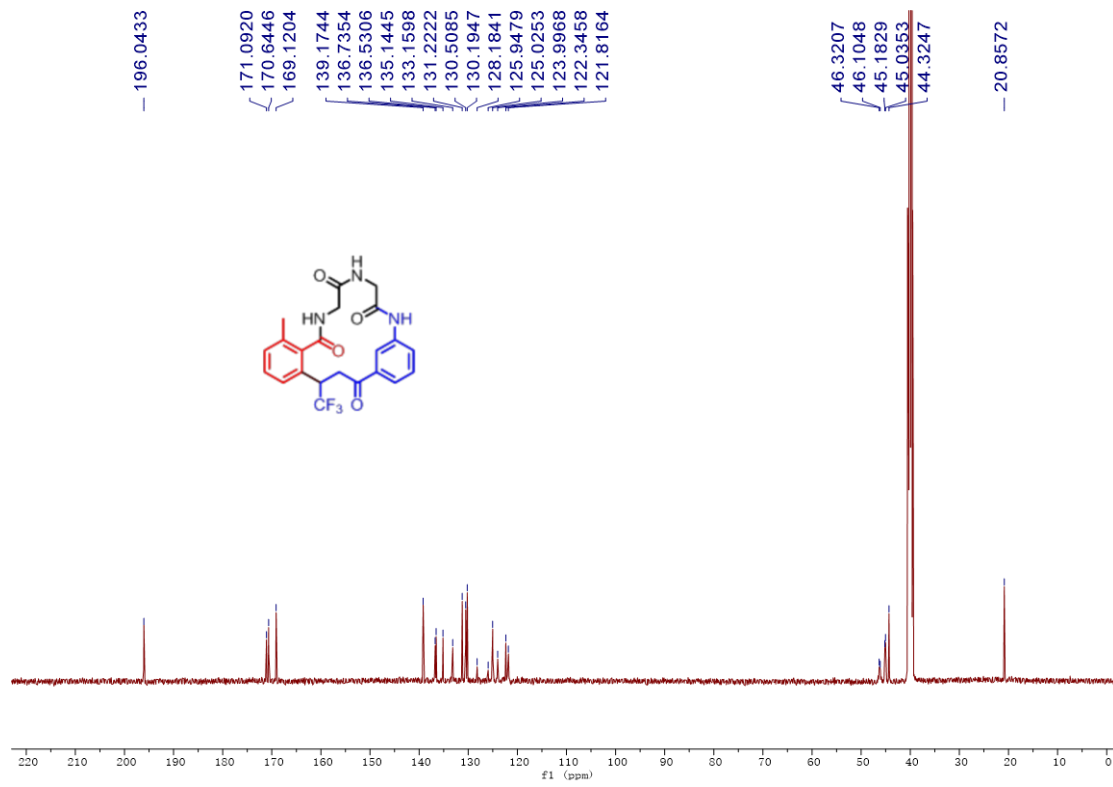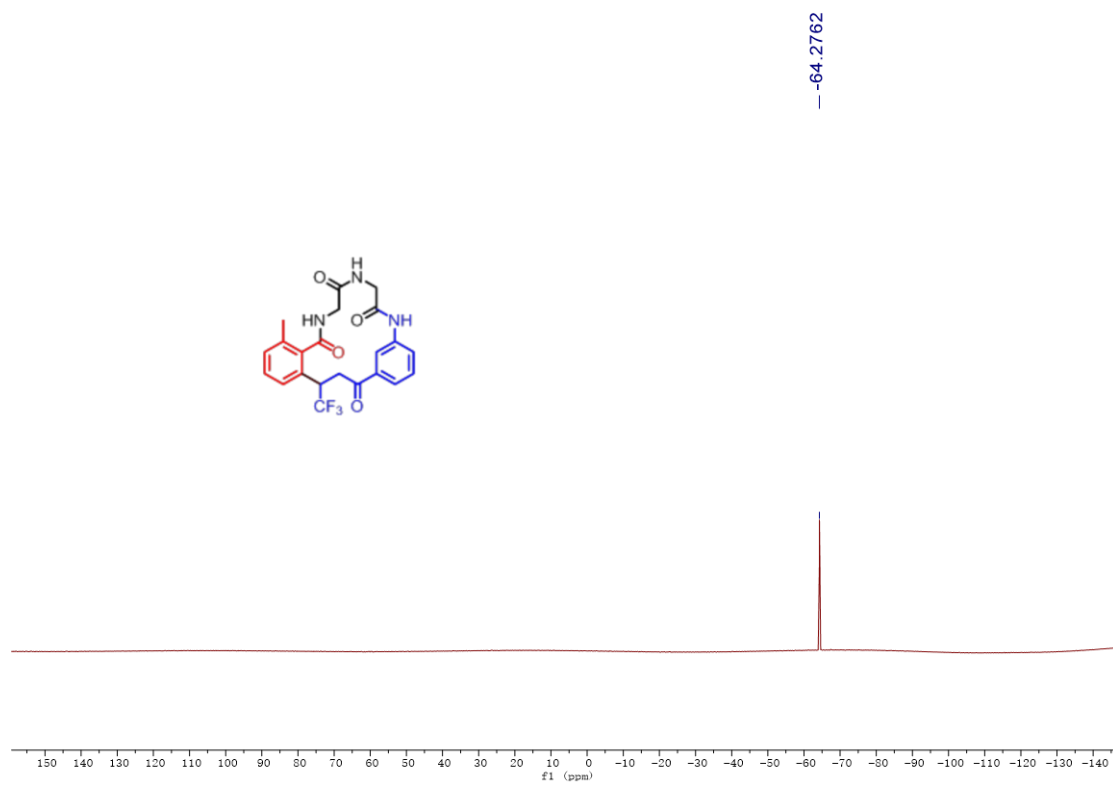

## References

- 1) G. Blay, I. Fernández, M. C. Muñoz, J. R. Pedro, C. Vila, *Chem. Eur. J.*, 2010, **16**, 9117-9122.
- 2) Q. Jiang, T. Guo, K. Wu, Z. Yu, *Chem. Commun.*, 2016, **52**, 2913-2915.
- 3) D. G. Stark, L. C. Morrill, P.-P. Yeh, A. M. Z. Slawin, T. J. C. O'Riordan, A. D. Smith, *Angew. Chem. Int. Ed.*, 2013, **52**, 11642-11646.
